# Supplementary material for: Size exclusion chromatography based proteomic and degradomic profiling of inflammasome-activated, murine bone marrow-derived dendritic cells highlights complex retention and release of cleavage products
Source: Mol Omics. 2024 Oct 2;20(9):595–610. doi: 10.1039/d4mo00163j (PMC11460583; doi:10.1039/d4mo00163j)
Supplement: MO-020-D4MO00163J-s002 [file MO-020-D4MO00163J-s002.xlsx]

## Sheet: Supplementary Table S1
Supplementary Table S1: TMT labelling scheme; L: LPS treatment, N: Nigericin treatment, T: Talabostat / Val-boroPro treatment; first number after L/N/T represents replicate and last two digits represent fraction number. Ref: Reference channel containing proteins from all fractions combined.
TMT Channel	126	127N	127C	128N	128C	129N	129C	130N	130C	131N	131C
Fraction 01	L301	N301		T101	L101	N101	T201	L201	N201	T301	Ref
Fraction 02	T302	L302	N302		T102	L102	N102	T202	L202	N202	Ref
Fraction 03	N203	T303	L303	N303		T103	L103	N103	T203	L203	Ref
Fraction 04	L204	N204	T304	L304	N304		T104	L104	N104	T204	Ref
Fraction 05	T205	L205	N205	T305	L305	N305		T105	L105	N105	Ref
Fraction 06	N106	T206	L206	N206	T306	L306	N306		T106	L106	Ref
Fraction 07	L107	N107	T207	L207	N207	T307	L307	N307		T107	Ref
Fraction 08	T108	L108	N108	T208	L208	N208	T308	L308	N308		Ref
Fraction 09		T109	L109	N109	T209	L209	N209	T309	L309	N309	Ref
Fraction 10	N310		T110	L110	N110	T210	L210	N210	T310	L310	Ref
Fraction 11	L311	N311		T111	L111	N111	T211	L211	N211	T311	Ref
Fraction 12	T312	L312	N312		T112	L112	N112	T212	L212	N212	Ref
Fraction 13	N213	T313	L313	N313		T113	L113	N113	T213	L213	Ref
Fraction 14	L214	N214	T314	L314	N314		T114	L114	N114	T214	Ref
Fraction 15	T215	L215	N215	T315	L315	N315		T115	L115	N115	Ref
Fraction 16	N116	T216	L216	N216	T316	L316	N316		T116	L116	Ref
Fraction 17	L117	N117	T217	L217	N217	T317	L317	N317		T117	Ref
Fraction 18	T118	L118	N118	T218	L218	N218	T318	L318	N318		Ref
Fraction 19		T119	L119	N119	T219	L219	N219	T319	L319	N319	Ref
Fraction 20	N320		T120	L120	N120	T220	L220	N220	T320	L320	Ref
Fraction 21	L321	N321		T121	L121	N121	T221	L221	N221	T321	Ref

## Sheet: Supplementary Table S2
Supplementary Table S2: Summarization of aspartate-cleaved peptides found to be significantly differential abundant after Limma analysis per fraction and contrast. In contrast column L stands for LPS, N for Nigericin and T for Talabostat / Val-boroPro treatment.
index	logFC	AveExpr	t	P.Value	adj.P.Val	B	contrast	fraction	modified_peptide	peptide	protein_id	assigned_modifications	protein_peptidemod	protein_description	protein_length	start_position	end_position	last_aa	aa_after	aa_before	following_10_resid	previous_10_resid	previous_all_resid	semi_type	general_position	specificity	is_terminal	nterm	tmt_tag	neo_termini_status	fdr_correction	protein_id_modif_pep	Peptide	prev_10_pad	following_10_pad	cleave_area	cleave_area20	len_20	len_clearea	len_follow	len_prev	len_followpad	len_prevpad	cleavage_site	short_cleavage_site
Q9QXS1_n[230]GPSVEAEPEYTFEGLR	4.99599	4.21461	9.85737	1.01673e-05	0.00351498	3.99878	N - L	Frac01	n[230]GPSVEAEPEYTFEGLR	GPSVEAEPEYTFEGLR	Q9QXS1	N-term(229.1629)	Q9QXS1_n[230]GPSVEAEPEYTFEGLR	Plectin	4691	2779	2794	R	Q	D	QKVPAQQLQE	ALPNGRDAPD	VAGMLMPLDRLRAIYEVLFREGVMVAKKDRRPRSLHPHVPGVTNLQVMRAMASLKARGLVRETFAWCHFYWYLTNEGIDHLRQYLHLPPEIVPASLQRVRRPVAMVIPARRRSPHVQTMQGPLGCPPKRGPLPAEDPAREERQVYRRKEREEGAPETPVVSATTVGTLARPGPEPAPATDERDRVQKKTFTKWVNKHLIKHWRAEAQRHISDLYEDLRDGHNLISLLEVLSGDSLPREKGRMRFHKLQNVQIALDYLRHRQVKLVNIRNDDIADGNPKLTLGLIWTIILHFQISDIQVSGQSEDMTAKEKLLLWSQRMVEGYQGLRCDNFTTSWRDGRLFNAIIHRHKPMLIDMNKVYRQTNLENLDQAFSVAERDLGVTRLLDPEDVDVPQPDEKSII…	semi_Nterm	not_terminal	semi_specific	not_terminal	TMT-labelled	nterm	neo_termini	feature-specific	Q9QXS1_n[230]GPSVEAEPEYTFEGLR	GPSVEAEPEYTFEGLR	ALPNGRDAPD	QKVPAQQLQE	ALPNGRDAPDGPSVEAEPEYTFEGLRQKVPAQQLQE	ALPNGRDAPDGPSVEAEPEY	20	36	10	10	10	10	ALPNGRDAPD | GPSVEAEPEY	DAPD | GPSV
E9Q616_n[230]VDIDVPD	2.15114	12.7777	7.46375	7.57033e-05	0.0166547	2.15559	N - L	Frac01	n[230]VDIDVPD	VDIDVPD	E9Q616	N-term(229.1629)	E9Q616_n[230]VDIDVPD	AHNAK nucleoprotein (desmoyokin)	5656	1287	1293	D	V	K	VNIEGPDAKL	KADLDVSGPK	EKEEETTRELLLPNWQGSGSHGLTIAQRDDGVFVQEVMQNSPAARTGVVKEGDQIVGATIYFDNLQSGEVTQLLNTMGHHTVGLKLHRKGDRSPEPGQTWTHEVFSSRSSEVVLSGDDEDYQRIYTTKIKPRLRSEDGVEGDLGETQSRTITVTRRVTAYTVDVTGREGVKDIDITSPEFMIKIPRHEVTEISNTDVETQPGKTVIRLPSGSGPASPTTGSAVDIRAGAISASGPELEGAGHSKFQVTVPGAKVGSLDVNVKAKGLDLGGKGGIRVPGVDVSSSLGAGSVEVQAPSLQSGDIGKIKIPTMKVPKFGVSAGLDGQIPEVGLSVSAPESSVGHKGDKPGLAIGGNIQAPHLEVNPSSVNIEGLEGKLKGPQITGPSLEGDLGLKGTKLQGN…	semi_Cterm	not_terminal	semi_specific	not_terminal	TMT-labelled	nterm	neo_termini	feature-specific	E9Q616_n[230]VDIDVPD	VDIDVPD	KADLDVSGPK	VNIEGPDAKL	KADLDVSGPKVDIDVPDVNIEGPDAKL	GPKVDIDVPDVNIEGPDAKL	20	27	10	10	10	10	GPKVDIDVPD | VNIEGPDAKL	DVPD | VNIE
P60710_n[230]SYVGDEAQSK	2.45394	5.70269	9.27634	1.5889e-05	0.00769026	3.66314	T - L	Frac01	n[230]SYVGDEAQSK	SYVGDEAQSK	P60710	10K(229.1629), N-term(229.1629)	P60710_n[230]SYVGDEAQSK	Actin, cytoplasmic 1	375	52	61	K	R	D	RGILTLKYPI	GVMVGMGQKD	DDDIAALVVDNGSGMCKAGFAGDDAPRAVFPSIVGRPRHQGVMVGMGQKD	semi_Nterm	not_terminal	semi_specific	not_terminal	TMT-labelled	nterm	neo_termini	feature-specific	P60710_n[230]SYVGDEAQSK	SYVGDEAQSK	GVMVGMGQKD	RGILTLKYPI	GVMVGMGQKDSYVGDEAQSKRGILTLKYPI	GVMVGMGQKDSYVGDEAQSK	20	30	10	10	10	10	GVMVGMGQKD | SYVGDEAQSK	GQKD | SYVG
P20152_n[230]LHDEEIQELQAQIQEQHVQID	1.55814	2.91598	7.08486	0.000108946	0.0182464	1.78711	T - L	Frac01	n[230]LHDEEIQELQAQIQEQHVQID	LHDEEIQELQAQIQEQHVQID	P20152	N-term(229.1629)	P20152_n[230]LHDEEIQELQAQIQEQHVQID	Vimentin	466	237	257	D	V	K	VDVSKPDLTA	LQEEIAFLKK	STRSVSSSSYRRMFGGSGTSSRPSSNRSYVTTSTRTYSLGSALRPSTSRSLYSSSPGGAYVTRSSAVRLRSSVPGVRLLQDSVDFSLADAINTEFKNTRTNEKVELQELNDRFANYIDKVRFLEQQNKILLAELEQLKGQGKSRLGDLYEEEMRELRRQVDQLTNDKARVEVERDNLAEDIMRLREKLQEEMLQREEAESTLQSFRQDVDNASLARLDLERKVESLQEEIAFLKK	semi_Cterm	not_terminal	semi_specific	not_terminal	TMT-labelled	nterm	neo_termini	feature-specific	P20152_n[230]LHDEEIQELQAQIQEQHVQID	LHDEEIQELQAQIQEQHVQID	LQEEIAFLKK	VDVSKPDLTA	LQEEIAFLKKLHDEEIQELQAQIQEQHVQIDVDVSKPDLTA	QIQEQHVQIDVDVSKPDLTA	20	41	10	10	10	10	QIQEQHVQID | VDVSKPDLTA	VQID | VDVS
E9Q616_n[230]VDIDVPD	2.00068	12.7777	7.04679	0.000113097	0.0182464	1.71184	T - L	Frac01	n[230]VDIDVPD	VDIDVPD	E9Q616	N-term(229.1629)	E9Q616_n[230]VDIDVPD	AHNAK nucleoprotein (desmoyokin)	5656	1287	1293	D	V	K	VNIEGPDAKL	KADLDVSGPK	EKEEETTRELLLPNWQGSGSHGLTIAQRDDGVFVQEVMQNSPAARTGVVKEGDQIVGATIYFDNLQSGEVTQLLNTMGHHTVGLKLHRKGDRSPEPGQTWTHEVFSSRSSEVVLSGDDEDYQRIYTTKIKPRLRSEDGVEGDLGETQSRTITVTRRVTAYTVDVTGREGVKDIDITSPEFMIKIPRHEVTEISNTDVETQPGKTVIRLPSGSGPASPTTGSAVDIRAGAISASGPELEGAGHSKFQVTVPGAKVGSLDVNVKAKGLDLGGKGGIRVPGVDVSSSLGAGSVEVQAPSLQSGDIGKIKIPTMKVPKFGVSAGLDGQIPEVGLSVSAPESSVGHKGDKPGLAIGGNIQAPHLEVNPSSVNIEGLEGKLKGPQITGPSLEGDLGLKGTKLQGN…	semi_Cterm	not_terminal	semi_specific	not_terminal	TMT-labelled	nterm	neo_termini	feature-specific	E9Q616_n[230]VDIDVPD	VDIDVPD	KADLDVSGPK	VNIEGPDAKL	KADLDVSGPKVDIDVPDVNIEGPDAKL	GPKVDIDVPDVNIEGPDAKL	20	27	10	10	10	10	GPKVDIDVPD | VNIEGPDAKL	DVPD | VNIE
Q8VEK0_n[230]GGPAGPPGGAAK	3.08038	10.7108	5.94862	0.000356659	0.0308255	0.530391	T - L	Frac01	n[230]GGPAGPPGGAAK	GGPAGPPGGAAK	Q8VEK0	12K(229.1629), N-term(229.1629)	Q8VEK0_n[230]GGPAGPPGGAAK	Cell cycle control protein 50A	364	13	24	K	T	D	TRRPDNTAFK	MNYSAKDEVD	AMNYSAKDEVD	semi_Nterm	not_terminal	semi_specific	not_terminal	TMT-labelled	nterm	neo_termini	feature-specific	Q8VEK0_n[230]GGPAGPPGGAAK	GGPAGPPGGAAK	MNYSAKDEVD	TRRPDNTAFK	MNYSAKDEVDGGPAGPPGGAAKTRRPDNTAFK	MNYSAKDEVDGGPAGPPGGA	20	32	10	10	10	10	MNYSAKDEVD | GGPAGPPGGA	DEVD | GGPA
P20152_n[230]ETNLESLPLVD	1.61217	4.29719	5.83295	0.000405926	0.0328217	0.433899	T - L	Frac01	n[230]ETNLESLPLVD	ETNLESLPLVD	P20152	N-term(229.1629)	P20152_n[230]ETNLESLPLVD	Vimentin	466	425	435	D	T	R	THSKRTLLIK	LPTFSSLNLR	STRSVSSSSYRRMFGGSGTSSRPSSNRSYVTTSTRTYSLGSALRPSTSRSLYSSSPGGAYVTRSSAVRLRSSVPGVRLLQDSVDFSLADAINTEFKNTRTNEKVELQELNDRFANYIDKVRFLEQQNKILLAELEQLKGQGKSRLGDLYEEEMRELRRQVDQLTNDKARVEVERDNLAEDIMRLREKLQEEMLQREEAESTLQSFRQDVDNASLARLDLERKVESLQEEIAFLKKLHDEEIQELQAQIQEQHVQIDVDVSKPDLTAALRDVRQQYESVAAKNLQEAEEWYKSKFADLSEAANRNNDALRQAKQESNEYRRQVQSLTCEVDALKGTNESLERQMREMEENFALEAANYQDTIGRLQDEIQNMKEEMARHLREYQDLLNVKMALDIEIATY…	semi_Cterm	not_terminal	semi_specific	not_terminal	TMT-labelled	nterm	neo_termini	feature-specific	P20152_n[230]ETNLESLPLVD	ETNLESLPLVD	LPTFSSLNLR	THSKRTLLIK	LPTFSSLNLRETNLESLPLVDTHSKRTLLIK	TNLESLPLVDTHSKRTLLIK	20	31	10	10	10	10	TNLESLPLVD | THSKRTLLIK	PLVD | THSK
Q9QXS1_n[230]GPSVEAEPEYTFEGLR	2.53494	4.21461	5.26687	0.000784277	0.0431352	-0.287509	T - L	Frac01	n[230]GPSVEAEPEYTFEGLR	GPSVEAEPEYTFEGLR	Q9QXS1	N-term(229.1629)	Q9QXS1_n[230]GPSVEAEPEYTFEGLR	Plectin	4691	2779	2794	R	Q	D	QKVPAQQLQE	ALPNGRDAPD	VAGMLMPLDRLRAIYEVLFREGVMVAKKDRRPRSLHPHVPGVTNLQVMRAMASLKARGLVRETFAWCHFYWYLTNEGIDHLRQYLHLPPEIVPASLQRVRRPVAMVIPARRRSPHVQTMQGPLGCPPKRGPLPAEDPAREERQVYRRKEREEGAPETPVVSATTVGTLARPGPEPAPATDERDRVQKKTFTKWVNKHLIKHWRAEAQRHISDLYEDLRDGHNLISLLEVLSGDSLPREKGRMRFHKLQNVQIALDYLRHRQVKLVNIRNDDIADGNPKLTLGLIWTIILHFQISDIQVSGQSEDMTAKEKLLLWSQRMVEGYQGLRCDNFTTSWRDGRLFNAIIHRHKPMLIDMNKVYRQTNLENLDQAFSVAERDLGVTRLLDPEDVDVPQPDEKSII…	semi_Nterm	not_terminal	semi_specific	not_terminal	TMT-labelled	nterm	neo_termini	feature-specific	Q9QXS1_n[230]GPSVEAEPEYTFEGLR	GPSVEAEPEYTFEGLR	ALPNGRDAPD	QKVPAQQLQE	ALPNGRDAPDGPSVEAEPEYTFEGLRQKVPAQQLQE	ALPNGRDAPDGPSVEAEPEY	20	36	10	10	10	10	ALPNGRDAPD | GPSVEAEPEY	DAPD | GPSV
Q9QXS1_n[230]GPSVEAEPEYTFEGLR	4.03547	4.58321	9.77444	1.16667e-05	0.00328834	3.97589	N - L	Frac02	n[230]GPSVEAEPEYTFEGLR	GPSVEAEPEYTFEGLR	Q9QXS1	N-term(229.1629)	Q9QXS1_n[230]GPSVEAEPEYTFEGLR	Plectin	4691	2779	2794	R	Q	D	QKVPAQQLQE	ALPNGRDAPD	VAGMLMPLDRLRAIYEVLFREGVMVAKKDRRPRSLHPHVPGVTNLQVMRAMASLKARGLVRETFAWCHFYWYLTNEGIDHLRQYLHLPPEIVPASLQRVRRPVAMVIPARRRSPHVQTMQGPLGCPPKRGPLPAEDPAREERQVYRRKEREEGAPETPVVSATTVGTLARPGPEPAPATDERDRVQKKTFTKWVNKHLIKHWRAEAQRHISDLYEDLRDGHNLISLLEVLSGDSLPREKGRMRFHKLQNVQIALDYLRHRQVKLVNIRNDDIADGNPKLTLGLIWTIILHFQISDIQVSGQSEDMTAKEKLLLWSQRMVEGYQGLRCDNFTTSWRDGRLFNAIIHRHKPMLIDMNKVYRQTNLENLDQAFSVAERDLGVTRLLDPEDVDVPQPDEKSII…	semi_Nterm	not_terminal	semi_specific	not_terminal	TMT-labelled	nterm	neo_termini	feature-specific	Q9QXS1_n[230]GPSVEAEPEYTFEGLR	GPSVEAEPEYTFEGLR	ALPNGRDAPD	QKVPAQQLQE	ALPNGRDAPDGPSVEAEPEYTFEGLRQKVPAQQLQE	ALPNGRDAPDGPSVEAEPEY	20	36	10	10	10	10	ALPNGRDAPD | GPSVEAEPEY	DAPD | GPSV
P01901_n[230]GGDYALAPGSQTSDLSLPD	2.62181	10.7066	9.42103	1.52534e-05	0.00383138	3.70418	N - L	Frac02	n[230]GGDYALAPGSQTSDLSLPD	GGDYALAPGSQTSDLSLPD	P01901	N-term(229.1629)	P01901_n[230]GGDYALAPGSQTSDLSLPD	H-2 class I histocompatibility antigen, K-B alpha chain	369	339	357	D	C	K	CKVMVHDPHS	KMRRRNTGGK	VPCTLLLLLAAALAPTQTRAGPHSLRYFVTAVSRPGLGEPRYMEVGYVDDTEFVRFDSDAENPRYEPRARWMEQEGPEYWERETQKAKGNEQSFRVDLRTLLGYYNQSKGGSHTIQVISGCEVGSDGRLLRGYQQYAYDGCDYIALNEDLKTWTAADMAALITKHKWEQAGEAERLRAYLEGTCVEWLRRYLKNGNATLLRTDSPKAHVTHHSRPEDKVTLRCWALGFYPADITLTWQLNGEELIQDMELVETRPAGDGTFQKWASVVVPLGKEQYYTCHVYHQGLPEPLTLRWEPPPSTVSNMATVAVLVVLGAAIVTGAVVAFVMKMRRRNTGGK	semi_Cterm	not_terminal	semi_specific	not_terminal	TMT-labelled	nterm	neo_termini	feature-specific	P01901_n[230]GGDYALAPGSQTSDLSLPD	GGDYALAPGSQTSDLSLPD	KMRRRNTGGK	CKVMVHDPHS	KMRRRNTGGKGGDYALAPGSQTSDLSLPDCKVMVHDPHS	SQTSDLSLPDCKVMVHDPHS	20	39	10	10	10	10	SQTSDLSLPD | CKVMVHDPHS	SLPD | CKVM
Q8VEK0_n[230]GGPAGPPGGAAK	3.16239	11.0613	8.9694	2.17619e-05	0.0043786	3.36628	N - L	Frac02	n[230]GGPAGPPGGAAK	GGPAGPPGGAAK	Q8VEK0	12K(229.1629), N-term(229.1629)	Q8VEK0_n[230]GGPAGPPGGAAK	Cell cycle control protein 50A	364	13	24	K	T	D	TRRPDNTAFK	MNYSAKDEVD	AMNYSAKDEVD	semi_Nterm	not_terminal	semi_specific	not_terminal	TMT-labelled	nterm	neo_termini	feature-specific	Q8VEK0_n[230]GGPAGPPGGAAK	GGPAGPPGGAAK	MNYSAKDEVD	TRRPDNTAFK	MNYSAKDEVDGGPAGPPGGAAKTRRPDNTAFK	MNYSAKDEVDGGPAGPPGGA	20	32	10	10	10	10	MNYSAKDEVD | GGPAGPPGGA	DEVD | GGPA
Q6DFZ1_n[230]GNPETNK	4.19733	10.2193	8.25238	3.95049e-05	0.00727681	2.78999	N - L	Frac02	n[230]GNPETNK	GNPETNK	Q6DFZ1	7K(229.1629), N-term(229.1629)	Q6DFZ1_n[230]GNPETNK	Golgi-specific brefeldin A-resistance factor 1	1861	618	624	K	S	D	SERATSDGKS	TARPGFEAVD	VDKNIYIIQGEINIVVGAIKRNARWSTHIPLDEERDPLLHSFSNLKEVLNSVTELSEIEPNVFLRPFLEVIRSEDTTGPITGLALTSVNKFLSYALIDPTHEGTAEGMENMADAVTHARFVGTDPASDEVVLMKILQVLRTLLLTPVGTHLTNESVCEIMQSCFRICFEMRLSELLRKSAEHTLVDMVQLLFTRLPQFKEEPKSYVGTNMKKLKMRAGGMSDSSKWKKQKRSPRPPRHTTKVTPGSELPTPNGATLPSNLTGGVPFIDAPTSISSASSEAASTVVSPCTDSGLELSSQTTSKEDLTDLEQAGSPREITTSEPGSSEMGASDQLDPQEGAHVEKAQSASVESIPEVLEECTSPADHSDSASVHDMDYVNPRGVRFTQSSQKEGTALVPYG…	semi_Nterm	not_terminal	semi_specific	not_terminal	TMT-labelled	nterm	neo_termini	feature-specific	Q6DFZ1_n[230]GNPETNK	GNPETNK	TARPGFEAVD	SERATSDGKS	TARPGFEAVDGNPETNKSERATSDGKS	TARPGFEAVDGNPETNKSER	20	27	10	10	10	10	TARPGFEAVD | GNPETNKSER	EAVD | GNPE
Q99K01_n[230]FFQELPASD	1.1419	11.8638	7.50327	7.71913e-05	0.010086	2.13865	N - L	Frac02	n[230]FFQELPASD	FFQELPASD	Q99K01	N-term(229.1629)	Q99K01_n[230]FFQELPASD	Pyridoxal-dependent decarboxylase domain-containing protein 1	787	394	402	D	S	R	SAFKAVPVSN	ELSSPVVVFR	DASLEKIADPTLAEMGKNLKEAMRMLEKSPRRTEEENGKKPVSEDIPGPLQGSGQDMVSILQLVQNLMHGDEDEEPQSTRIQNIGEQGHMALLGHSLGAYISTLDKEKLRKLTTRILSDTTLWLRRIFRYENGCAYFHEEEREGLAKICRLAIHSRYEDFVVDGFNVLYNKKPVIYLSAAARPGLGQYLCNQLGLPFPCLCRVPCNTMFGSQHQMDVAFLEKLIKDDVERGRLPLLLVANAGTAAVGHTDKIGRLKELCEQYGIWLHVEGVNLATLALGYVSSSVLAATKCDSMTLTPGLWLGLPAVPAVTLYKHDDPALTLVAGLTSNKPADKLRALPLWLSLQYLGLDGIVERIKHACHLSQRLQESLKKVDHIKILVEDELSSPVVVFR	semi_Cterm	not_terminal	semi_specific	not_terminal	TMT-labelled	nterm	neo_termini	feature-specific	Q99K01_n[230]FFQELPASD	FFQELPASD	ELSSPVVVFR	SAFKAVPVSN	ELSSPVVVFRFFQELPASDSAFKAVPVSN	RFFQELPASDSAFKAVPVSN	20	29	10	10	10	10	RFFQELPASD | SAFKAVPVSN	PASD | SAFK
Q64337_n[230]NVGESVAAALSPLGIEVD	2.54663	12.7318	7.2052	0.000102265	0.0108677	1.86669	N - L	Frac02	n[230]NVGESVAAALSPLGIEVD	NVGESVAAALSPLGIEVD	Q64337	N-term(229.1629)	Q64337_n[230]NVGESVAAALSPLGIEVD	Sequestosome-1	442	239	256	D	I	K	IDVEHGGKRS	PEDPNVNFLK	ASFTVKAYLLGKEEATREIRRFSFCFSPEPEAEAQAAAGPGPCERLLSRVAVLFPTLRPGGFQAHYRDEDGDLVAFSSDEELTMAMSYVKDDIFRIYIKEKKECRREHRPPCAQEAPRNMVHPNVICDGCNGPVVGTRYKCSVCPDYDLCSVCEGKGLHREHSKLIFPNPFGHLSDSFSHSRWLRKLKHGHFGWPGWEMGPPGNWSPRPPRAGDGRPCPTAESASAPPEDPNVNFLK	semi_Cterm	not_terminal	semi_specific	not_terminal	TMT-labelled	nterm	neo_termini	feature-specific	Q64337_n[230]NVGESVAAALSPLGIEVD	NVGESVAAALSPLGIEVD	PEDPNVNFLK	IDVEHGGKRS	PEDPNVNFLKNVGESVAAALSPLGIEVDIDVEHGGKRS	ALSPLGIEVDIDVEHGGKRS	20	38	10	10	10	10	ALSPLGIEVD | IDVEHGGKRS	IEVD | IDVE
P60710_n[230]GQVITIGNER	2.13889	12.247	6.65352	0.000176346	0.014765	1.32651	N - L	Frac02	n[230]GQVITIGNER	GQVITIGNER	P60710	N-term(229.1629)	P60710_n[230]GQVITIGNER	Actin, cytoplasmic 1	375	245	254	R	F	D	FRCPEALFQP	SLEKSYELPD	DDDIAALVVDNGSGMCKAGFAGDDAPRAVFPSIVGRPRHQGVMVGMGQKDSYVGDEAQSKRGILTLKYPIEHGIVTNWDDMEKIWHHTFYNELRVAPEEHPVLLTEAPLNPKANREKMTQIMFETFNTPAMYVAIQAVLSLYASGRTTGIVMDSGDGVTHTVPIYEGYALPHAILRLDLAGRDLTDYLMKILTERGYSFTTTAEREIVRDIKEKLCYVALDFEQEMATAASSSSLEKSYELPD	semi_Nterm	not_terminal	semi_specific	not_terminal	TMT-labelled	nterm	neo_termini	feature-specific	P60710_n[230]GQVITIGNER	GQVITIGNER	SLEKSYELPD	FRCPEALFQP	SLEKSYELPDGQVITIGNERFRCPEALFQP	SLEKSYELPDGQVITIGNER	20	30	10	10	10	10	SLEKSYELPD | GQVITIGNER	ELPD | GQVI
P13020_n[230]NWRDPDQTD	2.77519	12.5185	6.35463	0.000240256	0.0180606	0.963635	N - L	Frac02	n[230]NWRDPDQTD	NWRDPDQTD	P13020	N-term(229.1629)	P13020_n[230]NWRDPDQTD	Gelsolin	780	393	401	D	G	K	GPGLGYLSSH	ETPLFKQFFK	APYRSSLLCALLLLALCALSPSHAATTSRGRAQERAPQSRVSEARPSTMVVEHPEFLKAGKEPGLQIWRVEKFDLVPVPPNLYGDFFTGDAYVILKTVQLRNGNLQYDLHYWLGNECSQDESGAAAIFTVQLDDYLNGRAVQHREVQGFESSTFSGYFKSGLKYKKGGVASGFKHVVPNEVVVQRLFQVKGRRVVRATEVPVSWDSFNNGDCFILDLGNNIYQWCGSGSNKFERLKATQVSKGIRDNERSGRAQVHVSEEGGEPEAMLQVLGPKPALPEGTEDTAKEDAANRRLAKLYKVSNGAGSMSVSLVADENPFAQGALRSEDCFILDHGRDGKIFVWKGKQANMEERKAALKTASDFISKMQYPRQTQVSVLPEGGETPLFKQFFK	semi_Cterm	not_terminal	semi_specific	not_terminal	TMT-labelled	nterm	neo_termini	feature-specific	P13020_n[230]NWRDPDQTD	NWRDPDQTD	ETPLFKQFFK	GPGLGYLSSH	ETPLFKQFFKNWRDPDQTDGPGLGYLSSH	KNWRDPDQTDGPGLGYLSSH	20	29	10	10	10	10	KNWRDPDQTD | GPGLGYLSSH	DQTD | GPGL
Q68FL4_n[230]GTVTEAPR	1.74764	24.8428	5.29005	0.00079022	0.0307518	-0.178801	N - L	Frac02	n[230]GTVTEAPR	GTVTEAPR	Q68FL4	N-term(229.1629)	Q68FL4_n[230]GTVTEAPR	Putative adenosylhomocysteinase 3	613	112	119	R	T	D	TVKKQIQFAD	DGGEALVSPD	SVQVVSAAAAAKVPEVELKDLSPSEAEPQLGLSAAAVGAMVPPAGGGDPEAPAPAPAAERPPAPGPGSGPTAALSPAAGKVPQASAMKRSDPHHQHQRHRDGGEALVSPD	semi_Nterm	not_terminal	semi_specific	not_terminal	TMT-labelled	nterm	neo_termini	feature-specific	Q68FL4_n[230]GTVTEAPR	GTVTEAPR	DGGEALVSPD	TVKKQIQFAD	DGGEALVSPDGTVTEAPRTVKKQIQFAD	DGGEALVSPDGTVTEAPRTV	20	28	10	10	10	10	DGGEALVSPD | GTVTEAPRTV	VSPD | GTVT
Q8VEK0_n[230]GGPAGPPGGAAK	3.65248	11.0613	10.7875	5.65473e-06	0.002232	4.38959	T - L	Frac02	n[230]GGPAGPPGGAAK	GGPAGPPGGAAK	Q8VEK0	12K(229.1629), N-term(229.1629)	Q8VEK0_n[230]GGPAGPPGGAAK	Cell cycle control protein 50A	364	13	24	K	T	D	TRRPDNTAFK	MNYSAKDEVD	AMNYSAKDEVD	semi_Nterm	not_terminal	semi_specific	not_terminal	TMT-labelled	nterm	neo_termini	feature-specific	Q8VEK0_n[230]GGPAGPPGGAAK	GGPAGPPGGAAK	MNYSAKDEVD	TRRPDNTAFK	MNYSAKDEVDGGPAGPPGGAAKTRRPDNTAFK	MNYSAKDEVDGGPAGPPGGA	20	32	10	10	10	10	MNYSAKDEVD | GGPAGPPGGA	DEVD | GGPA
Q64337_n[230]NVGESVAAALSPLGIEVD	3.5556	12.7318	10.3864	7.47668e-06	0.00258226	4.11037	T - L	Frac02	n[230]NVGESVAAALSPLGIEVD	NVGESVAAALSPLGIEVD	Q64337	N-term(229.1629)	Q64337_n[230]NVGESVAAALSPLGIEVD	Sequestosome-1	442	239	256	D	I	K	IDVEHGGKRS	PEDPNVNFLK	ASFTVKAYLLGKEEATREIRRFSFCFSPEPEAEAQAAAGPGPCERLLSRVAVLFPTLRPGGFQAHYRDEDGDLVAFSSDEELTMAMSYVKDDIFRIYIKEKKECRREHRPPCAQEAPRNMVHPNVICDGCNGPVVGTRYKCSVCPDYDLCSVCEGKGLHREHSKLIFPNPFGHLSDSFSHSRWLRKLKHGHFGWPGWEMGPPGNWSPRPPRAGDGRPCPTAESASAPPEDPNVNFLK	semi_Cterm	not_terminal	semi_specific	not_terminal	TMT-labelled	nterm	neo_termini	feature-specific	Q64337_n[230]NVGESVAAALSPLGIEVD	NVGESVAAALSPLGIEVD	PEDPNVNFLK	IDVEHGGKRS	PEDPNVNFLKNVGESVAAALSPLGIEVDIDVEHGGKRS	ALSPLGIEVDIDVEHGGKRS	20	38	10	10	10	10	ALSPLGIEVD | IDVEHGGKRS	IEVD | IDVE
Q9QXS1_n[230]GPSVEAEPEYTFEGLR	4.20768	4.58321	9.79293	1.15069e-05	0.00353261	3.80619	T - L	Frac02	n[230]GPSVEAEPEYTFEGLR	GPSVEAEPEYTFEGLR	Q9QXS1	N-term(229.1629)	Q9QXS1_n[230]GPSVEAEPEYTFEGLR	Plectin	4691	2779	2794	R	Q	D	QKVPAQQLQE	ALPNGRDAPD	VAGMLMPLDRLRAIYEVLFREGVMVAKKDRRPRSLHPHVPGVTNLQVMRAMASLKARGLVRETFAWCHFYWYLTNEGIDHLRQYLHLPPEIVPASLQRVRRPVAMVIPARRRSPHVQTMQGPLGCPPKRGPLPAEDPAREERQVYRRKEREEGAPETPVVSATTVGTLARPGPEPAPATDERDRVQKKTFTKWVNKHLIKHWRAEAQRHISDLYEDLRDGHNLISLLEVLSGDSLPREKGRMRFHKLQNVQIALDYLRHRQVKLVNIRNDDIADGNPKLTLGLIWTIILHFQISDIQVSGQSEDMTAKEKLLLWSQRMVEGYQGLRCDNFTTSWRDGRLFNAIIHRHKPMLIDMNKVYRQTNLENLDQAFSVAERDLGVTRLLDPEDVDVPQPDEKSII…	semi_Nterm	not_terminal	semi_specific	not_terminal	TMT-labelled	nterm	neo_termini	feature-specific	Q9QXS1_n[230]GPSVEAEPEYTFEGLR	GPSVEAEPEYTFEGLR	ALPNGRDAPD	QKVPAQQLQE	ALPNGRDAPDGPSVEAEPEYTFEGLRQKVPAQQLQE	ALPNGRDAPDGPSVEAEPEY	20	36	10	10	10	10	ALPNGRDAPD | GPSVEAEPEY	DAPD | GPSV
P01901_n[230]GGDYALAPGSQTSDLSLPD	2.47957	10.7066	9.22764	1.77282e-05	0.00408193	3.43984	T - L	Frac02	n[230]GGDYALAPGSQTSDLSLPD	GGDYALAPGSQTSDLSLPD	P01901	N-term(229.1629)	P01901_n[230]GGDYALAPGSQTSDLSLPD	H-2 class I histocompatibility antigen, K-B alpha chain	369	339	357	D	C	K	CKVMVHDPHS	KMRRRNTGGK	VPCTLLLLLAAALAPTQTRAGPHSLRYFVTAVSRPGLGEPRYMEVGYVDDTEFVRFDSDAENPRYEPRARWMEQEGPEYWERETQKAKGNEQSFRVDLRTLLGYYNQSKGGSHTIQVISGCEVGSDGRLLRGYQQYAYDGCDYIALNEDLKTWTAADMAALITKHKWEQAGEAERLRAYLEGTCVEWLRRYLKNGNATLLRTDSPKAHVTHHSRPEDKVTLRCWALGFYPADITLTWQLNGEELIQDMELVETRPAGDGTFQKWASVVVPLGKEQYYTCHVYHQGLPEPLTLRWEPPPSTVSNMATVAVLVVLGAAIVTGAVVAFVMKMRRRNTGGK	semi_Cterm	not_terminal	semi_specific	not_terminal	TMT-labelled	nterm	neo_termini	feature-specific	P01901_n[230]GGDYALAPGSQTSDLSLPD	GGDYALAPGSQTSDLSLPD	KMRRRNTGGK	CKVMVHDPHS	KMRRRNTGGKGGDYALAPGSQTSDLSLPDCKVMVHDPHS	SQTSDLSLPDCKVMVHDPHS	20	39	10	10	10	10	SQTSDLSLPD | CKVMVHDPHS	SLPD | CKVM
Q99K01_n[230]FFQELPASD	1.12679	11.8638	7.40399	8.46899e-05	0.0141665	2.02516	T - L	Frac02	n[230]FFQELPASD	FFQELPASD	Q99K01	N-term(229.1629)	Q99K01_n[230]FFQELPASD	Pyridoxal-dependent decarboxylase domain-containing protein 1	787	394	402	D	S	R	SAFKAVPVSN	ELSSPVVVFR	DASLEKIADPTLAEMGKNLKEAMRMLEKSPRRTEEENGKKPVSEDIPGPLQGSGQDMVSILQLVQNLMHGDEDEEPQSTRIQNIGEQGHMALLGHSLGAYISTLDKEKLRKLTTRILSDTTLWLRRIFRYENGCAYFHEEEREGLAKICRLAIHSRYEDFVVDGFNVLYNKKPVIYLSAAARPGLGQYLCNQLGLPFPCLCRVPCNTMFGSQHQMDVAFLEKLIKDDVERGRLPLLLVANAGTAAVGHTDKIGRLKELCEQYGIWLHVEGVNLATLALGYVSSSVLAATKCDSMTLTPGLWLGLPAVPAVTLYKHDDPALTLVAGLTSNKPADKLRALPLWLSLQYLGLDGIVERIKHACHLSQRLQESLKKVDHIKILVEDELSSPVVVFR	semi_Cterm	not_terminal	semi_specific	not_terminal	TMT-labelled	nterm	neo_termini	feature-specific	Q99K01_n[230]FFQELPASD	FFQELPASD	ELSSPVVVFR	SAFKAVPVSN	ELSSPVVVFRFFQELPASDSAFKAVPVSN	RFFQELPASDSAFKAVPVSN	20	29	10	10	10	10	RFFQELPASD | SAFKAVPVSN	PASD | SAFK
Q6DFZ1_n[230]GNPETNK	3.49069	10.2193	6.86304	0.000142831	0.0207706	1.5497	T - L	Frac02	n[230]GNPETNK	GNPETNK	Q6DFZ1	7K(229.1629), N-term(229.1629)	Q6DFZ1_n[230]GNPETNK	Golgi-specific brefeldin A-resistance factor 1	1861	618	624	K	S	D	SERATSDGKS	TARPGFEAVD	VDKNIYIIQGEINIVVGAIKRNARWSTHIPLDEERDPLLHSFSNLKEVLNSVTELSEIEPNVFLRPFLEVIRSEDTTGPITGLALTSVNKFLSYALIDPTHEGTAEGMENMADAVTHARFVGTDPASDEVVLMKILQVLRTLLLTPVGTHLTNESVCEIMQSCFRICFEMRLSELLRKSAEHTLVDMVQLLFTRLPQFKEEPKSYVGTNMKKLKMRAGGMSDSSKWKKQKRSPRPPRHTTKVTPGSELPTPNGATLPSNLTGGVPFIDAPTSISSASSEAASTVVSPCTDSGLELSSQTTSKEDLTDLEQAGSPREITTSEPGSSEMGASDQLDPQEGAHVEKAQSASVESIPEVLEECTSPADHSDSASVHDMDYVNPRGVRFTQSSQKEGTALVPYG…	semi_Nterm	not_terminal	semi_specific	not_terminal	TMT-labelled	nterm	neo_termini	feature-specific	Q6DFZ1_n[230]GNPETNK	GNPETNK	TARPGFEAVD	SERATSDGKS	TARPGFEAVDGNPETNKSERATSDGKS	TARPGFEAVDGNPETNKSER	20	27	10	10	10	10	TARPGFEAVD | GNPETNKSER	EAVD | GNPE
Q68FL4_n[230]GTVTEAPR	2.00045	24.8428	6.0356	0.000338131	0.0346021	0.723351	T - L	Frac02	n[230]GTVTEAPR	GTVTEAPR	Q68FL4	N-term(229.1629)	Q68FL4_n[230]GTVTEAPR	Putative adenosylhomocysteinase 3	613	112	119	R	T	D	TVKKQIQFAD	DGGEALVSPD	SVQVVSAAAAAKVPEVELKDLSPSEAEPQLGLSAAAVGAMVPPAGGGDPEAPAPAPAAERPPAPGPGSGPTAALSPAAGKVPQASAMKRSDPHHQHQRHRDGGEALVSPD	semi_Nterm	not_terminal	semi_specific	not_terminal	TMT-labelled	nterm	neo_termini	feature-specific	Q68FL4_n[230]GTVTEAPR	GTVTEAPR	DGGEALVSPD	TVKKQIQFAD	DGGEALVSPDGTVTEAPRTVKKQIQFAD	DGGEALVSPDGTVTEAPRTV	20	28	10	10	10	10	DGGEALVSPD | GTVTEAPRTV	VSPD | GTVT
P13020_n[230]NWRDPDQTD	2.68259	12.5185	5.88647	0.000398402	0.0379581	0.558452	T - L	Frac02	n[230]NWRDPDQTD	NWRDPDQTD	P13020	N-term(229.1629)	P13020_n[230]NWRDPDQTD	Gelsolin	780	393	401	D	G	K	GPGLGYLSSH	ETPLFKQFFK	APYRSSLLCALLLLALCALSPSHAATTSRGRAQERAPQSRVSEARPSTMVVEHPEFLKAGKEPGLQIWRVEKFDLVPVPPNLYGDFFTGDAYVILKTVQLRNGNLQYDLHYWLGNECSQDESGAAAIFTVQLDDYLNGRAVQHREVQGFESSTFSGYFKSGLKYKKGGVASGFKHVVPNEVVVQRLFQVKGRRVVRATEVPVSWDSFNNGDCFILDLGNNIYQWCGSGSNKFERLKATQVSKGIRDNERSGRAQVHVSEEGGEPEAMLQVLGPKPALPEGTEDTAKEDAANRRLAKLYKVSNGAGSMSVSLVADENPFAQGALRSEDCFILDHGRDGKIFVWKGKQANMEERKAALKTASDFISKMQYPRQTQVSVLPEGGETPLFKQFFK	semi_Cterm	not_terminal	semi_specific	not_terminal	TMT-labelled	nterm	neo_termini	feature-specific	P13020_n[230]NWRDPDQTD	NWRDPDQTD	ETPLFKQFFK	GPGLGYLSSH	ETPLFKQFFKNWRDPDQTDGPGLGYLSSH	KNWRDPDQTDGPGLGYLSSH	20	29	10	10	10	10	KNWRDPDQTD | GPGLGYLSSH	DQTD | GPGL
Q61335_n[230]GAAEDGDKLD	3.81127	9.95991	5.62946	0.000532089	0.0490054	0.262473	T - L	Frac02	n[230]GAAEDGDKLD	GAAEDGDKLD	Q61335	8K(229.1629), N-term(229.1629)	Q61335_n[230]GAAEDGDKLD	B-cell receptor-associated protein 31	245	160	169	D	I	K	IGNTEMKLEE	YMEENDQLKK	SLQWTTVATFLYAEVFAVLLLCIPFISPKRWQKVFKSRLVELVVTYGNTFFVVLIVILVLLVIDAVREILKYDDVTEKVNLQNNPGAMEHFHMKLFRAQRNLYIAGFSLLLSFLLRRLVTLISQQATLLASNEAFKKQAESASEAAKKYMEENDQLKK	semi_Cterm	not_terminal	semi_specific	not_terminal	TMT-labelled	nterm	neo_termini	feature-specific	Q61335_n[230]GAAEDGDKLD	GAAEDGDKLD	YMEENDQLKK	IGNTEMKLEE	YMEENDQLKKGAAEDGDKLDIGNTEMKLEE	GAAEDGDKLDIGNTEMKLEE	20	30	10	10	10	10	GAAEDGDKLD | IGNTEMKLEE	DKLD | IGNT
Q6DFZ1_n[230]GNPETNK	5.43011	11.1213	18.4399	1.02871e-07	0.000166393	5.7531	N - L	Frac03	n[230]GNPETNK	GNPETNK	Q6DFZ1	7K(229.1629), N-term(229.1629)	Q6DFZ1_n[230]GNPETNK	Golgi-specific brefeldin A-resistance factor 1	1861	618	624	K	S	D	SERATSDGKS	TARPGFEAVD	VDKNIYIIQGEINIVVGAIKRNARWSTHIPLDEERDPLLHSFSNLKEVLNSVTELSEIEPNVFLRPFLEVIRSEDTTGPITGLALTSVNKFLSYALIDPTHEGTAEGMENMADAVTHARFVGTDPASDEVVLMKILQVLRTLLLTPVGTHLTNESVCEIMQSCFRICFEMRLSELLRKSAEHTLVDMVQLLFTRLPQFKEEPKSYVGTNMKKLKMRAGGMSDSSKWKKQKRSPRPPRHTTKVTPGSELPTPNGATLPSNLTGGVPFIDAPTSISSASSEAASTVVSPCTDSGLELSSQTTSKEDLTDLEQAGSPREITTSEPGSSEMGASDQLDPQEGAHVEKAQSASVESIPEVLEECTSPADHSDSASVHDMDYVNPRGVRFTQSSQKEGTALVPYG…	semi_Nterm	not_terminal	semi_specific	not_terminal	TMT-labelled	nterm	neo_termini	feature-specific	Q6DFZ1_n[230]GNPETNK	GNPETNK	TARPGFEAVD	SERATSDGKS	TARPGFEAVDGNPETNKSERATSDGKS	TARPGFEAVDGNPETNKSER	20	27	10	10	10	10	TARPGFEAVD | GNPETNKSER	EAVD | GNPE
P20152_n[230]VDVSKPDLTAALR	3.84668	7.38064	13.9583	8.52235e-07	0.000918993	4.68761	N - L	Frac03	n[230]VDVSKPDLTAALR	VDVSKPDLTAALR	P20152	5K(229.1629), N-term(229.1629)	P20152_n[230]VDVSKPDLTAALR	Vimentin	466	258	270	R	D	D	DVRQQYESVA	QIQEQHVQID	STRSVSSSSYRRMFGGSGTSSRPSSNRSYVTTSTRTYSLGSALRPSTSRSLYSSSPGGAYVTRSSAVRLRSSVPGVRLLQDSVDFSLADAINTEFKNTRTNEKVELQELNDRFANYIDKVRFLEQQNKILLAELEQLKGQGKSRLGDLYEEEMRELRRQVDQLTNDKARVEVERDNLAEDIMRLREKLQEEMLQREEAESTLQSFRQDVDNASLARLDLERKVESLQEEIAFLKKLHDEEIQELQAQIQEQHVQID	semi_Nterm	not_terminal	semi_specific	not_terminal	TMT-labelled	nterm	neo_termini	feature-specific	P20152_n[230]VDVSKPDLTAALR	VDVSKPDLTAALR	QIQEQHVQID	DVRQQYESVA	QIQEQHVQIDVDVSKPDLTAALRDVRQQYESVA	QIQEQHVQIDVDVSKPDLTA	20	33	10	10	10	10	QIQEQHVQID | VDVSKPDLTA	VQID | VDVS
Q8VEK0_n[230]GGPAGPPGGAAK	3.53881	10.9723	6.68461	0.000173762	0.0432399	1.27418	N - L	Frac03	n[230]GGPAGPPGGAAK	GGPAGPPGGAAK	Q8VEK0	12K(229.1629), N-term(229.1629)	Q8VEK0_n[230]GGPAGPPGGAAK	Cell cycle control protein 50A	364	13	24	K	T	D	TRRPDNTAFK	MNYSAKDEVD	AMNYSAKDEVD	semi_Nterm	not_terminal	semi_specific	not_terminal	TMT-labelled	nterm	neo_termini	feature-specific	Q8VEK0_n[230]GGPAGPPGGAAK	GGPAGPPGGAAK	MNYSAKDEVD	TRRPDNTAFK	MNYSAKDEVDGGPAGPPGGAAKTRRPDNTAFK	MNYSAKDEVDGGPAGPPGGA	20	32	10	10	10	10	MNYSAKDEVD | GGPAGPPGGA	DEVD | GGPA
Q6DFZ1_n[230]GNPETNK	4.74871	11.1213	17.2761	1.69215e-07	0.000136852	6.95004	T - L	Frac03	n[230]GNPETNK	GNPETNK	Q6DFZ1	7K(229.1629), N-term(229.1629)	Q6DFZ1_n[230]GNPETNK	Golgi-specific brefeldin A-resistance factor 1	1861	618	624	K	S	D	SERATSDGKS	TARPGFEAVD	VDKNIYIIQGEINIVVGAIKRNARWSTHIPLDEERDPLLHSFSNLKEVLNSVTELSEIEPNVFLRPFLEVIRSEDTTGPITGLALTSVNKFLSYALIDPTHEGTAEGMENMADAVTHARFVGTDPASDEVVLMKILQVLRTLLLTPVGTHLTNESVCEIMQSCFRICFEMRLSELLRKSAEHTLVDMVQLLFTRLPQFKEEPKSYVGTNMKKLKMRAGGMSDSSKWKKQKRSPRPPRHTTKVTPGSELPTPNGATLPSNLTGGVPFIDAPTSISSASSEAASTVVSPCTDSGLELSSQTTSKEDLTDLEQAGSPREITTSEPGSSEMGASDQLDPQEGAHVEKAQSASVESIPEVLEECTSPADHSDSASVHDMDYVNPRGVRFTQSSQKEGTALVPYG…	semi_Nterm	not_terminal	semi_specific	not_terminal	TMT-labelled	nterm	neo_termini	feature-specific	Q6DFZ1_n[230]GNPETNK	GNPETNK	TARPGFEAVD	SERATSDGKS	TARPGFEAVDGNPETNKSERATSDGKS	TARPGFEAVDGNPETNKSER	20	27	10	10	10	10	TARPGFEAVD | GNPETNKSER	EAVD | GNPE
P20152_n[230]VDVSKPDLTAALR	2.33725	7.38064	10.0641	9.67627e-06	0.00447182	4.04646	T - L	Frac03	n[230]VDVSKPDLTAALR	VDVSKPDLTAALR	P20152	5K(229.1629), N-term(229.1629)	P20152_n[230]VDVSKPDLTAALR	Vimentin	466	258	270	R	D	D	DVRQQYESVA	QIQEQHVQID	STRSVSSSSYRRMFGGSGTSSRPSSNRSYVTTSTRTYSLGSALRPSTSRSLYSSSPGGAYVTRSSAVRLRSSVPGVRLLQDSVDFSLADAINTEFKNTRTNEKVELQELNDRFANYIDKVRFLEQQNKILLAELEQLKGQGKSRLGDLYEEEMRELRRQVDQLTNDKARVEVERDNLAEDIMRLREKLQEEMLQREEAESTLQSFRQDVDNASLARLDLERKVESLQEEIAFLKKLHDEEIQELQAQIQEQHVQID	semi_Nterm	not_terminal	semi_specific	not_terminal	TMT-labelled	nterm	neo_termini	feature-specific	P20152_n[230]VDVSKPDLTAALR	VDVSKPDLTAALR	QIQEQHVQID	DVRQQYESVA	QIQEQHVQIDVDVSKPDLTAALRDVRQQYESVA	QIQEQHVQIDVDVSKPDLTA	20	33	10	10	10	10	QIQEQHVQID | VDVSKPDLTA	VQID | VDVS
Q8VEK0_n[230]GGPAGPPGGAAK	4.15623	10.9723	8.14431	4.43119e-05	0.0119181	2.66087	T - L	Frac03	n[230]GGPAGPPGGAAK	GGPAGPPGGAAK	Q8VEK0	12K(229.1629), N-term(229.1629)	Q8VEK0_n[230]GGPAGPPGGAAK	Cell cycle control protein 50A	364	13	24	K	T	D	TRRPDNTAFK	MNYSAKDEVD	AMNYSAKDEVD	semi_Nterm	not_terminal	semi_specific	not_terminal	TMT-labelled	nterm	neo_termini	feature-specific	Q8VEK0_n[230]GGPAGPPGGAAK	GGPAGPPGGAAK	MNYSAKDEVD	TRRPDNTAFK	MNYSAKDEVDGGPAGPPGGAAKTRRPDNTAFK	MNYSAKDEVDGGPAGPPGGA	20	32	10	10	10	10	MNYSAKDEVD | GGPAGPPGGA	DEVD | GGPA
P04441_n[230]LISNHEQLPILGNRPR	1.89405	7.92992	6.28513	0.000262597	0.0369093	0.953518	T - L	Frac03	n[230]LISNHEQLPILGNRPR	LISNHEQLPILGNRPR	P04441	N-term(229.1629)	P04441_n[230]LISNHEQLPILGNRPR	H-2 class II histocompatibility antigen gamma chain	279	7	22	R	E	D	EPERCSRGAL	MDDQRD	DDQRD	semi_Nterm	not_terminal	semi_specific	not_terminal	TMT-labelled	nterm	neo_termini	feature-specific	P04441_n[230]LISNHEQLPILGNRPR	LISNHEQLPILGNRPR	XXXXMDDQRD	EPERCSRGAL	XXXXMDDQRDLISNHEQLPILGNRPREPERCSRGAL	XXXXMDDQRDLISNHEQLPI	20	36	10	6	10	10	XXXXMDDQRD | LISNHEQLPI	DQRD | LISN
Q6A0D4_n[230]AATAGVNR	3.65628	12.5441	5.68515	0.000506174	0.0454854	0.301249	T - L	Frac03	n[230]AATAGVNR	AATAGVNR	Q6A0D4	N-term(229.1629)	Q6A0D4_n[230]AATAGVNR	Raftlin	554	212	219	R	R	D	RPETKPGSTG	NDTPKAAETD	GCSLNKLEKREEKRPGNIYSTLKRPQVETKVDVTYEYCFLEFTTLTAAELPRSSATRLASLRDLPDQLLELYQQGFSLAALHPFVQPTRRQEKILLEHIFRAILVKKTNRSQKAELHDEGYTLELDYCSSLEHLADQKLIPEFIKKVQEAASQGLKFVSVVPQYQPSVSSAGSRRLKPVANSVEDARDVKCTLGDRSSLENDTPKAAETD	semi_Nterm	not_terminal	semi_specific	not_terminal	TMT-labelled	nterm	neo_termini	feature-specific	Q6A0D4_n[230]AATAGVNR	AATAGVNR	NDTPKAAETD	RPETKPGSTG	NDTPKAAETDAATAGVNRRPETKPGSTG	NDTPKAAETDAATAGVNRRP	20	28	10	10	10	10	NDTPKAAETD | AATAGVNRRP	AETD | AATA
Q6DFZ1_n[230]GNPETNK	4.05927	9.96984	9.27034	1.7633e-05	0.0155993	3.24309	N - L	Frac04	n[230]GNPETNK	GNPETNK	Q6DFZ1	7K(229.1629), N-term(229.1629)	Q6DFZ1_n[230]GNPETNK	Golgi-specific brefeldin A-resistance factor 1	1861	618	624	K	S	D	SERATSDGKS	TARPGFEAVD	VDKNIYIIQGEINIVVGAIKRNARWSTHIPLDEERDPLLHSFSNLKEVLNSVTELSEIEPNVFLRPFLEVIRSEDTTGPITGLALTSVNKFLSYALIDPTHEGTAEGMENMADAVTHARFVGTDPASDEVVLMKILQVLRTLLLTPVGTHLTNESVCEIMQSCFRICFEMRLSELLRKSAEHTLVDMVQLLFTRLPQFKEEPKSYVGTNMKKLKMRAGGMSDSSKWKKQKRSPRPPRHTTKVTPGSELPTPNGATLPSNLTGGVPFIDAPTSISSASSEAASTVVSPCTDSGLELSSQTTSKEDLTDLEQAGSPREITTSEPGSSEMGASDQLDPQEGAHVEKAQSASVESIPEVLEECTSPADHSDSASVHDMDYVNPRGVRFTQSSQKEGTALVPYG…	semi_Nterm	not_terminal	semi_specific	not_terminal	TMT-labelled	nterm	neo_termini	feature-specific	Q6DFZ1_n[230]GNPETNK	GNPETNK	TARPGFEAVD	SERATSDGKS	TARPGFEAVDGNPETNKSERATSDGKS	TARPGFEAVDGNPETNKSER	20	27	10	10	10	10	TARPGFEAVD | GNPETNKSER	EAVD | GNPE
Q68FL4_n[230]GTVTEAPR	2.22376	25.4868	8.81339	2.53567e-05	0.0168242	2.82494	N - L	Frac04	n[230]GTVTEAPR	GTVTEAPR	Q68FL4	N-term(229.1629)	Q68FL4_n[230]GTVTEAPR	Putative adenosylhomocysteinase 3	613	112	119	R	T	D	TVKKQIQFAD	DGGEALVSPD	SVQVVSAAAAAKVPEVELKDLSPSEAEPQLGLSAAAVGAMVPPAGGGDPEAPAPAPAAERPPAPGPGSGPTAALSPAAGKVPQASAMKRSDPHHQHQRHRDGGEALVSPD	semi_Nterm	not_terminal	semi_specific	not_terminal	TMT-labelled	nterm	neo_termini	feature-specific	Q68FL4_n[230]GTVTEAPR	GTVTEAPR	DGGEALVSPD	TVKKQIQFAD	DGGEALVSPDGTVTEAPRTVKKQIQFAD	DGGEALVSPDGTVTEAPRTV	20	28	10	10	10	10	DGGEALVSPD | GTVTEAPRTV	VSPD | GTVT
Q64337_n[230]NVGESVAAALSPLGIEVD	1.6395	11.828	7.01612	0.000125359	0.0255926	1.60719	N - L	Frac04	n[230]NVGESVAAALSPLGIEVD	NVGESVAAALSPLGIEVD	Q64337	N-term(229.1629)	Q64337_n[230]NVGESVAAALSPLGIEVD	Sequestosome-1	442	239	256	D	I	K	IDVEHGGKRS	PEDPNVNFLK	ASFTVKAYLLGKEEATREIRRFSFCFSPEPEAEAQAAAGPGPCERLLSRVAVLFPTLRPGGFQAHYRDEDGDLVAFSSDEELTMAMSYVKDDIFRIYIKEKKECRREHRPPCAQEAPRNMVHPNVICDGCNGPVVGTRYKCSVCPDYDLCSVCEGKGLHREHSKLIFPNPFGHLSDSFSHSRWLRKLKHGHFGWPGWEMGPPGNWSPRPPRAGDGRPCPTAESASAPPEDPNVNFLK	semi_Cterm	not_terminal	semi_specific	not_terminal	TMT-labelled	nterm	neo_termini	feature-specific	Q64337_n[230]NVGESVAAALSPLGIEVD	NVGESVAAALSPLGIEVD	PEDPNVNFLK	IDVEHGGKRS	PEDPNVNFLKNVGESVAAALSPLGIEVDIDVEHGGKRS	ALSPLGIEVDIDVEHGGKRS	20	38	10	10	10	10	ALSPLGIEVD | IDVEHGGKRS	IEVD | IDVE
P20152_n[230]VDVSKPDLTAALR	2.96837	7.34255	6.12172	0.000313297	0.0489112	0.77899	N - L	Frac04	n[230]VDVSKPDLTAALR	VDVSKPDLTAALR	P20152	5K(229.1629), N-term(229.1629)	P20152_n[230]VDVSKPDLTAALR	Vimentin	466	258	270	R	D	D	DVRQQYESVA	QIQEQHVQID	STRSVSSSSYRRMFGGSGTSSRPSSNRSYVTTSTRTYSLGSALRPSTSRSLYSSSPGGAYVTRSSAVRLRSSVPGVRLLQDSVDFSLADAINTEFKNTRTNEKVELQELNDRFANYIDKVRFLEQQNKILLAELEQLKGQGKSRLGDLYEEEMRELRRQVDQLTNDKARVEVERDNLAEDIMRLREKLQEEMLQREEAESTLQSFRQDVDNASLARLDLERKVESLQEEIAFLKKLHDEEIQELQAQIQEQHVQID	semi_Nterm	not_terminal	semi_specific	not_terminal	TMT-labelled	nterm	neo_termini	feature-specific	P20152_n[230]VDVSKPDLTAALR	VDVSKPDLTAALR	QIQEQHVQID	DVRQQYESVA	QIQEQHVQIDVDVSKPDLTAALRDVRQQYESVA	QIQEQHVQIDVDVSKPDLTA	20	33	10	10	10	10	QIQEQHVQID | VDVSKPDLTA	VQID | VDVS
Q6DFZ1_n[230]GNPETNK	3.75415	9.96984	8.57352	3.08802e-05	0.0278473	2.87195	T - L	Frac04	n[230]GNPETNK	GNPETNK	Q6DFZ1	7K(229.1629), N-term(229.1629)	Q6DFZ1_n[230]GNPETNK	Golgi-specific brefeldin A-resistance factor 1	1861	618	624	K	S	D	SERATSDGKS	TARPGFEAVD	VDKNIYIIQGEINIVVGAIKRNARWSTHIPLDEERDPLLHSFSNLKEVLNSVTELSEIEPNVFLRPFLEVIRSEDTTGPITGLALTSVNKFLSYALIDPTHEGTAEGMENMADAVTHARFVGTDPASDEVVLMKILQVLRTLLLTPVGTHLTNESVCEIMQSCFRICFEMRLSELLRKSAEHTLVDMVQLLFTRLPQFKEEPKSYVGTNMKKLKMRAGGMSDSSKWKKQKRSPRPPRHTTKVTPGSELPTPNGATLPSNLTGGVPFIDAPTSISSASSEAASTVVSPCTDSGLELSSQTTSKEDLTDLEQAGSPREITTSEPGSSEMGASDQLDPQEGAHVEKAQSASVESIPEVLEECTSPADHSDSASVHDMDYVNPRGVRFTQSSQKEGTALVPYG…	semi_Nterm	not_terminal	semi_specific	not_terminal	TMT-labelled	nterm	neo_termini	feature-specific	Q6DFZ1_n[230]GNPETNK	GNPETNK	TARPGFEAVD	SERATSDGKS	TARPGFEAVDGNPETNKSERATSDGKS	TARPGFEAVDGNPETNKSER	20	27	10	10	10	10	TARPGFEAVD | GNPETNKSER	EAVD | GNPE
Q68FL4_n[230]GTVTEAPR	2.04408	25.4868	8.42643	3.49262e-05	0.0278473	2.71468	T - L	Frac04	n[230]GTVTEAPR	GTVTEAPR	Q68FL4	N-term(229.1629)	Q68FL4_n[230]GTVTEAPR	Putative adenosylhomocysteinase 3	613	112	119	R	T	D	TVKKQIQFAD	DGGEALVSPD	SVQVVSAAAAAKVPEVELKDLSPSEAEPQLGLSAAAVGAMVPPAGGGDPEAPAPAPAAERPPAPGPGSGPTAALSPAAGKVPQASAMKRSDPHHQHQRHRDGGEALVSPD	semi_Nterm	not_terminal	semi_specific	not_terminal	TMT-labelled	nterm	neo_termini	feature-specific	Q68FL4_n[230]GTVTEAPR	GTVTEAPR	DGGEALVSPD	TVKKQIQFAD	DGGEALVSPDGTVTEAPRTVKKQIQFAD	DGGEALVSPDGTVTEAPRTV	20	28	10	10	10	10	DGGEALVSPD | GTVTEAPRTV	VSPD | GTVT
Q64337_n[230]NVGESVAAALSPLGIEVD	1.7465	11.828	6.55884	0.000197975	0.0363986	1.17544	T - L	Frac04	n[230]NVGESVAAALSPLGIEVD	NVGESVAAALSPLGIEVD	Q64337	N-term(229.1629)	Q64337_n[230]NVGESVAAALSPLGIEVD	Sequestosome-1	442	239	256	D	I	K	IDVEHGGKRS	PEDPNVNFLK	ASFTVKAYLLGKEEATREIRRFSFCFSPEPEAEAQAAAGPGPCERLLSRVAVLFPTLRPGGFQAHYRDEDGDLVAFSSDEELTMAMSYVKDDIFRIYIKEKKECRREHRPPCAQEAPRNMVHPNVICDGCNGPVVGTRYKCSVCPDYDLCSVCEGKGLHREHSKLIFPNPFGHLSDSFSHSRWLRKLKHGHFGWPGWEMGPPGNWSPRPPRAGDGRPCPTAESASAPPEDPNVNFLK	semi_Cterm	not_terminal	semi_specific	not_terminal	TMT-labelled	nterm	neo_termini	feature-specific	Q64337_n[230]NVGESVAAALSPLGIEVD	NVGESVAAALSPLGIEVD	PEDPNVNFLK	IDVEHGGKRS	PEDPNVNFLKNVGESVAAALSPLGIEVDIDVEHGGKRS	ALSPLGIEVDIDVEHGGKRS	20	38	10	10	10	10	ALSPLGIEVD | IDVEHGGKRS	IEVD | IDVE
P13020_n[230]NWRDPDQTD	3.11161	13.5073	10.7678	6.12784e-06	0.00605226	3.43508	N - L	Frac05	n[230]NWRDPDQTD	NWRDPDQTD	P13020	N-term(229.1629)	P13020_n[230]NWRDPDQTD	Gelsolin	780	393	401	D	G	K	GPGLGYLSSH	ETPLFKQFFK	APYRSSLLCALLLLALCALSPSHAATTSRGRAQERAPQSRVSEARPSTMVVEHPEFLKAGKEPGLQIWRVEKFDLVPVPPNLYGDFFTGDAYVILKTVQLRNGNLQYDLHYWLGNECSQDESGAAAIFTVQLDDYLNGRAVQHREVQGFESSTFSGYFKSGLKYKKGGVASGFKHVVPNEVVVQRLFQVKGRRVVRATEVPVSWDSFNNGDCFILDLGNNIYQWCGSGSNKFERLKATQVSKGIRDNERSGRAQVHVSEEGGEPEAMLQVLGPKPALPEGTEDTAKEDAANRRLAKLYKVSNGAGSMSVSLVADENPFAQGALRSEDCFILDHGRDGKIFVWKGKQANMEERKAALKTASDFISKMQYPRQTQVSVLPEGGETPLFKQFFK	semi_Cterm	not_terminal	semi_specific	not_terminal	TMT-labelled	nterm	neo_termini	feature-specific	P13020_n[230]NWRDPDQTD	NWRDPDQTD	ETPLFKQFFK	GPGLGYLSSH	ETPLFKQFFKNWRDPDQTDGPGLGYLSSH	KNWRDPDQTDGPGLGYLSSH	20	29	10	10	10	10	KNWRDPDQTD | GPGLGYLSSH	DQTD | GPGL
Q6DFZ1_n[230]GNPETNK	4.69309	11.6936	9.3871	1.6603e-05	0.0081991	2.90834	N - L	Frac05	n[230]GNPETNK	GNPETNK	Q6DFZ1	7K(229.1629), N-term(229.1629)	Q6DFZ1_n[230]GNPETNK	Golgi-specific brefeldin A-resistance factor 1	1861	618	624	K	S	D	SERATSDGKS	TARPGFEAVD	VDKNIYIIQGEINIVVGAIKRNARWSTHIPLDEERDPLLHSFSNLKEVLNSVTELSEIEPNVFLRPFLEVIRSEDTTGPITGLALTSVNKFLSYALIDPTHEGTAEGMENMADAVTHARFVGTDPASDEVVLMKILQVLRTLLLTPVGTHLTNESVCEIMQSCFRICFEMRLSELLRKSAEHTLVDMVQLLFTRLPQFKEEPKSYVGTNMKKLKMRAGGMSDSSKWKKQKRSPRPPRHTTKVTPGSELPTPNGATLPSNLTGGVPFIDAPTSISSASSEAASTVVSPCTDSGLELSSQTTSKEDLTDLEQAGSPREITTSEPGSSEMGASDQLDPQEGAHVEKAQSASVESIPEVLEECTSPADHSDSASVHDMDYVNPRGVRFTQSSQKEGTALVPYG…	semi_Nterm	not_terminal	semi_specific	not_terminal	TMT-labelled	nterm	neo_termini	feature-specific	Q6DFZ1_n[230]GNPETNK	GNPETNK	TARPGFEAVD	SERATSDGKS	TARPGFEAVDGNPETNKSERATSDGKS	TARPGFEAVDGNPETNKSER	20	27	10	10	10	10	TARPGFEAVD | GNPETNKSER	EAVD | GNPE
Q64337_n[230]NVGESVAAALSPLGIEVD	2.24007	13.0329	9.02024	2.21021e-05	0.00935552	2.13331	N - L	Frac05	n[230]NVGESVAAALSPLGIEVD	NVGESVAAALSPLGIEVD	Q64337	N-term(229.1629)	Q64337_n[230]NVGESVAAALSPLGIEVD	Sequestosome-1	442	239	256	D	I	K	IDVEHGGKRS	PEDPNVNFLK	ASFTVKAYLLGKEEATREIRRFSFCFSPEPEAEAQAAAGPGPCERLLSRVAVLFPTLRPGGFQAHYRDEDGDLVAFSSDEELTMAMSYVKDDIFRIYIKEKKECRREHRPPCAQEAPRNMVHPNVICDGCNGPVVGTRYKCSVCPDYDLCSVCEGKGLHREHSKLIFPNPFGHLSDSFSHSRWLRKLKHGHFGWPGWEMGPPGNWSPRPPRAGDGRPCPTAESASAPPEDPNVNFLK	semi_Cterm	not_terminal	semi_specific	not_terminal	TMT-labelled	nterm	neo_termini	feature-specific	Q64337_n[230]NVGESVAAALSPLGIEVD	NVGESVAAALSPLGIEVD	PEDPNVNFLK	IDVEHGGKRS	PEDPNVNFLKNVGESVAAALSPLGIEVDIDVEHGGKRS	ALSPLGIEVDIDVEHGGKRS	20	38	10	10	10	10	ALSPLGIEVD | IDVEHGGKRS	IEVD | IDVE
Q64337_n[230]NVGESVAAALSPLGIEVD	2.08148	13.0329	10.2295	8.91168e-06	0.0132027	3.69074	T - L	Frac05	n[230]NVGESVAAALSPLGIEVD	NVGESVAAALSPLGIEVD	Q64337	N-term(229.1629)	Q64337_n[230]NVGESVAAALSPLGIEVD	Sequestosome-1	442	239	256	D	I	K	IDVEHGGKRS	PEDPNVNFLK	ASFTVKAYLLGKEEATREIRRFSFCFSPEPEAEAQAAAGPGPCERLLSRVAVLFPTLRPGGFQAHYRDEDGDLVAFSSDEELTMAMSYVKDDIFRIYIKEKKECRREHRPPCAQEAPRNMVHPNVICDGCNGPVVGTRYKCSVCPDYDLCSVCEGKGLHREHSKLIFPNPFGHLSDSFSHSRWLRKLKHGHFGWPGWEMGPPGNWSPRPPRAGDGRPCPTAESASAPPEDPNVNFLK	semi_Cterm	not_terminal	semi_specific	not_terminal	TMT-labelled	nterm	neo_termini	feature-specific	Q64337_n[230]NVGESVAAALSPLGIEVD	NVGESVAAALSPLGIEVD	PEDPNVNFLK	IDVEHGGKRS	PEDPNVNFLKNVGESVAAALSPLGIEVDIDVEHGGKRS	ALSPLGIEVDIDVEHGGKRS	20	38	10	10	10	10	ALSPLGIEVD | IDVEHGGKRS	IEVD | IDVE
P13020_n[230]NWRDPDQTD	2.66097	13.5073	9.24418	1.85391e-05	0.0180232	3.16151	T - L	Frac05	n[230]NWRDPDQTD	NWRDPDQTD	P13020	N-term(229.1629)	P13020_n[230]NWRDPDQTD	Gelsolin	780	393	401	D	G	K	GPGLGYLSSH	ETPLFKQFFK	APYRSSLLCALLLLALCALSPSHAATTSRGRAQERAPQSRVSEARPSTMVVEHPEFLKAGKEPGLQIWRVEKFDLVPVPPNLYGDFFTGDAYVILKTVQLRNGNLQYDLHYWLGNECSQDESGAAAIFTVQLDDYLNGRAVQHREVQGFESSTFSGYFKSGLKYKKGGVASGFKHVVPNEVVVQRLFQVKGRRVVRATEVPVSWDSFNNGDCFILDLGNNIYQWCGSGSNKFERLKATQVSKGIRDNERSGRAQVHVSEEGGEPEAMLQVLGPKPALPEGTEDTAKEDAANRRLAKLYKVSNGAGSMSVSLVADENPFAQGALRSEDCFILDHGRDGKIFVWKGKQANMEERKAALKTASDFISKMQYPRQTQVSVLPEGGETPLFKQFFK	semi_Cterm	not_terminal	semi_specific	not_terminal	TMT-labelled	nterm	neo_termini	feature-specific	P13020_n[230]NWRDPDQTD	NWRDPDQTD	ETPLFKQFFK	GPGLGYLSSH	ETPLFKQFFKNWRDPDQTDGPGLGYLSSH	KNWRDPDQTDGPGLGYLSSH	20	29	10	10	10	10	KNWRDPDQTD | GPGLGYLSSH	DQTD | GPGL
Q6DFZ1_n[230]GNPETNK	3.96396	11.6936	7.9287	5.50685e-05	0.0233097	2.32138	T - L	Frac05	n[230]GNPETNK	GNPETNK	Q6DFZ1	7K(229.1629), N-term(229.1629)	Q6DFZ1_n[230]GNPETNK	Golgi-specific brefeldin A-resistance factor 1	1861	618	624	K	S	D	SERATSDGKS	TARPGFEAVD	VDKNIYIIQGEINIVVGAIKRNARWSTHIPLDEERDPLLHSFSNLKEVLNSVTELSEIEPNVFLRPFLEVIRSEDTTGPITGLALTSVNKFLSYALIDPTHEGTAEGMENMADAVTHARFVGTDPASDEVVLMKILQVLRTLLLTPVGTHLTNESVCEIMQSCFRICFEMRLSELLRKSAEHTLVDMVQLLFTRLPQFKEEPKSYVGTNMKKLKMRAGGMSDSSKWKKQKRSPRPPRHTTKVTPGSELPTPNGATLPSNLTGGVPFIDAPTSISSASSEAASTVVSPCTDSGLELSSQTTSKEDLTDLEQAGSPREITTSEPGSSEMGASDQLDPQEGAHVEKAQSASVESIPEVLEECTSPADHSDSASVHDMDYVNPRGVRFTQSSQKEGTALVPYG…	semi_Nterm	not_terminal	semi_specific	not_terminal	TMT-labelled	nterm	neo_termini	feature-specific	Q6DFZ1_n[230]GNPETNK	GNPETNK	TARPGFEAVD	SERATSDGKS	TARPGFEAVDGNPETNKSERATSDGKS	TARPGFEAVDGNPETNKSER	20	27	10	10	10	10	TARPGFEAVD | GNPETNKSER	EAVD | GNPE
P01901_n[230]GGDYALAPGSQTSDLSLPD	2.62688	9.09497	7.39928	8.89964e-05	0.032962	1.91538	T - L	Frac05	n[230]GGDYALAPGSQTSDLSLPD	GGDYALAPGSQTSDLSLPD	P01901	N-term(229.1629)	P01901_n[230]GGDYALAPGSQTSDLSLPD	H-2 class I histocompatibility antigen, K-B alpha chain	369	339	357	D	C	K	CKVMVHDPHS	KMRRRNTGGK	VPCTLLLLLAAALAPTQTRAGPHSLRYFVTAVSRPGLGEPRYMEVGYVDDTEFVRFDSDAENPRYEPRARWMEQEGPEYWERETQKAKGNEQSFRVDLRTLLGYYNQSKGGSHTIQVISGCEVGSDGRLLRGYQQYAYDGCDYIALNEDLKTWTAADMAALITKHKWEQAGEAERLRAYLEGTCVEWLRRYLKNGNATLLRTDSPKAHVTHHSRPEDKVTLRCWALGFYPADITLTWQLNGEELIQDMELVETRPAGDGTFQKWASVVVPLGKEQYYTCHVYHQGLPEPLTLRWEPPPSTVSNMATVAVLVVLGAAIVTGAVVAFVMKMRRRNTGGK	semi_Cterm	not_terminal	semi_specific	not_terminal	TMT-labelled	nterm	neo_termini	feature-specific	P01901_n[230]GGDYALAPGSQTSDLSLPD	GGDYALAPGSQTSDLSLPD	KMRRRNTGGK	CKVMVHDPHS	KMRRRNTGGKGGDYALAPGSQTSDLSLPDCKVMVHDPHS	SQTSDLSLPDCKVMVHDPHS	20	39	10	10	10	10	SQTSDLSLPD | CKVMVHDPHS	SLPD | CKVM
Q8BWG8_n[230]EVPESETPVDTNLIELD	3.65995	11.7345	8.27813	3.85533e-05	0.0062046	2.81813	N - L	Frac06	n[230]EVPESETPVDTNLIELD	EVPESETPVDTNLIELD	Q8BWG8	N-term(229.1629)	Q8BWG8_n[230]EVPESETPVDTNLIELD	Beta-arrestin-1	418	364	380	D	T	R	TNDDDIVFED	PKPKEEPPHR	GDKGTRVFKKASPNGKLTVYLGKRDFVDHIDLVDPVDGVVLVDPEYLKERRVYVTLTCAFRYGREDLDVLGLTFRKDLFVANVQSFPPAPEDKKPLTRLQERLIKKLGEHACPFTFEIPPNLPCSVTLQPGPEDTGKACGVDYEVKAFCAENLEEKIHKRNSVRLVIRKVQYAPERPGPQPTAETTRQFLMSDKPLHLEASLDKEIYYHGEPISVNVHVTNNTNKTVKKIKISVRQYADICLFNTAQYKCPVAMEEADDNVAPSSTFCKVYTLTPFLANNREKRGLALDGKLKHEDTNLASSTLLREGANREILGIIVSYKVKVKLVVSRGGLLGDLASSDVAVELPFTLMHPKPKEEPPHR	semi_Cterm	not_terminal	semi_specific	not_terminal	TMT-labelled	nterm	neo_termini	feature-specific	Q8BWG8_n[230]EVPESETPVDTNLIELD	EVPESETPVDTNLIELD	PKPKEEPPHR	TNDDDIVFED	PKPKEEPPHREVPESETPVDTNLIELDTNDDDIVFED	PVDTNLIELDTNDDDIVFED	20	37	10	10	10	10	PVDTNLIELD | TNDDDIVFED	IELD | TNDD
P20152_n[230]VDVSKPDLTAALR	4.23038	7.33395	6.76009	0.000158042	0.0181634	1.35875	N - L	Frac06	n[230]VDVSKPDLTAALR	VDVSKPDLTAALR	P20152	5K(229.1629), N-term(229.1629)	P20152_n[230]VDVSKPDLTAALR	Vimentin	466	258	270	R	D	D	DVRQQYESVA	QIQEQHVQID	STRSVSSSSYRRMFGGSGTSSRPSSNRSYVTTSTRTYSLGSALRPSTSRSLYSSSPGGAYVTRSSAVRLRSSVPGVRLLQDSVDFSLADAINTEFKNTRTNEKVELQELNDRFANYIDKVRFLEQQNKILLAELEQLKGQGKSRLGDLYEEEMRELRRQVDQLTNDKARVEVERDNLAEDIMRLREKLQEEMLQREEAESTLQSFRQDVDNASLARLDLERKVESLQEEIAFLKKLHDEEIQELQAQIQEQHVQID	semi_Nterm	not_terminal	semi_specific	not_terminal	TMT-labelled	nterm	neo_termini	feature-specific	P20152_n[230]VDVSKPDLTAALR	VDVSKPDLTAALR	QIQEQHVQID	DVRQQYESVA	QIQEQHVQIDVDVSKPDLTAALRDVRQQYESVA	QIQEQHVQIDVDVSKPDLTA	20	33	10	10	10	10	QIQEQHVQID | VDVSKPDLTA	VQID | VDVS
Q9JKF1_n[230]GLGVVRPHYGSVLDNER	3.61727	6.23472	5.85625	0.000411405	0.0326946	0.374831	N - L	Frac06	n[230]GLGVVRPHYGSVLDNER	GLGVVRPHYGSVLDNER	Q9JKF1	N-term(229.1629)	Q9JKF1_n[230]GLGVVRPHYGSVLDNER	Ras GTPase-activating-like protein IQGAP1	1657	9	25	R	L	D	LTAEEMDERR	MSAAEEVD	SAAEEVD	semi_Nterm	not_terminal	semi_specific	not_terminal	TMT-labelled	nterm	neo_termini	feature-specific	Q9JKF1_n[230]GLGVVRPHYGSVLDNER	GLGVVRPHYGSVLDNER	XXMSAAEEVD	LTAEEMDERR	XXMSAAEEVDGLGVVRPHYGSVLDNERLTAEEMDERR	XXMSAAEEVDGLGVVRPHYG	20	37	10	8	10	10	XXMSAAEEVD | GLGVVRPHYG	EEVD | GLGV
Q9QXS1_n[230]GPSVEAEPEYTFEGLR	4.41607	6.5126	5.41284	0.000682752	0.0460271	-0.082374	N - L	Frac06	n[230]GPSVEAEPEYTFEGLR	GPSVEAEPEYTFEGLR	Q9QXS1	N-term(229.1629)	Q9QXS1_n[230]GPSVEAEPEYTFEGLR	Plectin	4691	2779	2794	R	Q	D	QKVPAQQLQE	ALPNGRDAPD	VAGMLMPLDRLRAIYEVLFREGVMVAKKDRRPRSLHPHVPGVTNLQVMRAMASLKARGLVRETFAWCHFYWYLTNEGIDHLRQYLHLPPEIVPASLQRVRRPVAMVIPARRRSPHVQTMQGPLGCPPKRGPLPAEDPAREERQVYRRKEREEGAPETPVVSATTVGTLARPGPEPAPATDERDRVQKKTFTKWVNKHLIKHWRAEAQRHISDLYEDLRDGHNLISLLEVLSGDSLPREKGRMRFHKLQNVQIALDYLRHRQVKLVNIRNDDIADGNPKLTLGLIWTIILHFQISDIQVSGQSEDMTAKEKLLLWSQRMVEGYQGLRCDNFTTSWRDGRLFNAIIHRHKPMLIDMNKVYRQTNLENLDQAFSVAERDLGVTRLLDPEDVDVPQPDEKSII…	semi_Nterm	not_terminal	semi_specific	not_terminal	TMT-labelled	nterm	neo_termini	feature-specific	Q9QXS1_n[230]GPSVEAEPEYTFEGLR	GPSVEAEPEYTFEGLR	ALPNGRDAPD	QKVPAQQLQE	ALPNGRDAPDGPSVEAEPEYTFEGLRQKVPAQQLQE	ALPNGRDAPDGPSVEAEPEY	20	36	10	10	10	10	ALPNGRDAPD | GPSVEAEPEY	DAPD | GPSV
Q9JKF1_n[230]GLGVVRPHYGSVLDNER	3.90201	6.23472	6.41036	0.000226243	0.0222649	1.04579	T - L	Frac06	n[230]GLGVVRPHYGSVLDNER	GLGVVRPHYGSVLDNER	Q9JKF1	N-term(229.1629)	Q9JKF1_n[230]GLGVVRPHYGSVLDNER	Ras GTPase-activating-like protein IQGAP1	1657	9	25	R	L	D	LTAEEMDERR	MSAAEEVD	SAAEEVD	semi_Nterm	not_terminal	semi_specific	not_terminal	TMT-labelled	nterm	neo_termini	feature-specific	Q9JKF1_n[230]GLGVVRPHYGSVLDNER	GLGVVRPHYGSVLDNER	XXMSAAEEVD	LTAEEMDERR	XXMSAAEEVDGLGVVRPHYGSVLDNERLTAEEMDERR	XXMSAAEEVDGLGVVRPHYG	20	37	10	8	10	10	XXMSAAEEVD | GLGVVRPHYG	EEVD | GLGV
Q8BWG8_n[230]EVPESETPVDTNLIELD	2.72337	11.7345	5.93997	0.000374957	0.0337711	0.606251	T - L	Frac06	n[230]EVPESETPVDTNLIELD	EVPESETPVDTNLIELD	Q8BWG8	N-term(229.1629)	Q8BWG8_n[230]EVPESETPVDTNLIELD	Beta-arrestin-1	418	364	380	D	T	R	TNDDDIVFED	PKPKEEPPHR	GDKGTRVFKKASPNGKLTVYLGKRDFVDHIDLVDPVDGVVLVDPEYLKERRVYVTLTCAFRYGREDLDVLGLTFRKDLFVANVQSFPPAPEDKKPLTRLQERLIKKLGEHACPFTFEIPPNLPCSVTLQPGPEDTGKACGVDYEVKAFCAENLEEKIHKRNSVRLVIRKVQYAPERPGPQPTAETTRQFLMSDKPLHLEASLDKEIYYHGEPISVNVHVTNNTNKTVKKIKISVRQYADICLFNTAQYKCPVAMEEADDNVAPSSTFCKVYTLTPFLANNREKRGLALDGKLKHEDTNLASSTLLREGANREILGIIVSYKVKVKLVVSRGGLLGDLASSDVAVELPFTLMHPKPKEEPPHR	semi_Cterm	not_terminal	semi_specific	not_terminal	TMT-labelled	nterm	neo_termini	feature-specific	Q8BWG8_n[230]EVPESETPVDTNLIELD	EVPESETPVDTNLIELD	PKPKEEPPHR	TNDDDIVFED	PKPKEEPPHREVPESETPVDTNLIELDTNDDDIVFED	PVDTNLIELDTNDDDIVFED	20	37	10	10	10	10	PVDTNLIELD | TNDDDIVFED	IELD | TNDD
P60710_n[230]DLYANTVLSGGTTMYPGIAD	21.4522	9.70049	29.1584	2.8811e-09	1.25587e-05	6.56974	N - L	Frac07	n[230]DLYANTVLSGGTTMYPGIAD	DLYANTVLSGGTTMYPGIAD	P60710	N-term(229.1629)	P60710_n[230]DLYANTVLSGGTTMYPGIAD	Actin, cytoplasmic 1	375	292	311	D	R	K	RMQKEITALA	IMKCDVDIRK	DDDIAALVVDNGSGMCKAGFAGDDAPRAVFPSIVGRPRHQGVMVGMGQKDSYVGDEAQSKRGILTLKYPIEHGIVTNWDDMEKIWHHTFYNELRVAPEEHPVLLTEAPLNPKANREKMTQIMFETFNTPAMYVAIQAVLSLYASGRTTGIVMDSGDGVTHTVPIYEGYALPHAILRLDLAGRDLTDYLMKILTERGYSFTTTAEREIVRDIKEKLCYVALDFEQEMATAASSSSLEKSYELPDGQVITIGNERFRCPEALFQPSFLGMESCGIHETTFNSIMKCDVDIRK	semi_Cterm	not_terminal	semi_specific	not_terminal	TMT-labelled	nterm	neo_termini	feature-specific	P60710_n[230]DLYANTVLSGGTTMYPGIAD	DLYANTVLSGGTTMYPGIAD	IMKCDVDIRK	RMQKEITALA	IMKCDVDIRKDLYANTVLSGGTTMYPGIADRMQKEITALA	GTTMYPGIADRMQKEITALA	20	40	10	10	10	10	GTTMYPGIAD | RMQKEITALA	GIAD | RMQK
P20152_n[230]VDVSKPDLTAALR	7.31141	9.33241	22.0701	2.48873e-08	3.36546e-05	6.13861	N - L	Frac07	n[230]VDVSKPDLTAALR	VDVSKPDLTAALR	P20152	5K(229.1629), N-term(229.1629)	P20152_n[230]VDVSKPDLTAALR	Vimentin	466	258	270	R	D	D	DVRQQYESVA	QIQEQHVQID	STRSVSSSSYRRMFGGSGTSSRPSSNRSYVTTSTRTYSLGSALRPSTSRSLYSSSPGGAYVTRSSAVRLRSSVPGVRLLQDSVDFSLADAINTEFKNTRTNEKVELQELNDRFANYIDKVRFLEQQNKILLAELEQLKGQGKSRLGDLYEEEMRELRRQVDQLTNDKARVEVERDNLAEDIMRLREKLQEEMLQREEAESTLQSFRQDVDNASLARLDLERKVESLQEEIAFLKKLHDEEIQELQAQIQEQHVQID	semi_Nterm	not_terminal	semi_specific	not_terminal	TMT-labelled	nterm	neo_termini	feature-specific	P20152_n[230]VDVSKPDLTAALR	VDVSKPDLTAALR	QIQEQHVQID	DVRQQYESVA	QIQEQHVQIDVDVSKPDLTAALRDVRQQYESVA	QIQEQHVQIDVDVSKPDLTA	20	33	10	10	10	10	QIQEQHVQID | VDVSKPDLTA	VQID | VDVS
Q64337_n[230]SNTQPSSCSSEVSKPD	4.84461	12.7216	21.6218	2.91558e-08	3.36546e-05	5.72849	N - L	Frac07	n[230]SNTQPSSCSSEVSKPD	SNTQPSSCSSEVSKPD	Q64337	14K(229.1629), 8C(57.0214), N-term(229.1629)	Q64337_n[230]SNTQPSSCSSEVSKPD	Sequestosome-1	442	284	299	D	G	K	GAGEGPAQSL	ESSSTGTEDK	ASFTVKAYLLGKEEATREIRRFSFCFSPEPEAEAQAAAGPGPCERLLSRVAVLFPTLRPGGFQAHYRDEDGDLVAFSSDEELTMAMSYVKDDIFRIYIKEKKECRREHRPPCAQEAPRNMVHPNVICDGCNGPVVGTRYKCSVCPDYDLCSVCEGKGLHREHSKLIFPNPFGHLSDSFSHSRWLRKLKHGHFGWPGWEMGPPGNWSPRPPRAGDGRPCPTAESASAPPEDPNVNFLKNVGESVAAALSPLGIEVDIDVEHGGKRSRLTPTTPESSSTGTEDK	semi_Cterm	not_terminal	semi_specific	not_terminal	TMT-labelled	nterm	neo_termini	feature-specific	Q64337_n[230]SNTQPSSCSSEVSKPD	SNTQPSSCSSEVSKPD	ESSSTGTEDK	GAGEGPAQSL	ESSSTGTEDKSNTQPSSCSSEVSKPDGAGEGPAQSL	SCSSEVSKPDGAGEGPAQSL	20	36	10	10	10	10	SCSSEVSKPD | GAGEGPAQSL	SKPD | GAGE
P13020_n[230]NWRDPDQTD	3.52243	14.2815	18.3662	1.02277e-07	8.91651e-05	4.69313	N - L	Frac07	n[230]NWRDPDQTD	NWRDPDQTD	P13020	N-term(229.1629)	P13020_n[230]NWRDPDQTD	Gelsolin	780	393	401	D	G	K	GPGLGYLSSH	ETPLFKQFFK	APYRSSLLCALLLLALCALSPSHAATTSRGRAQERAPQSRVSEARPSTMVVEHPEFLKAGKEPGLQIWRVEKFDLVPVPPNLYGDFFTGDAYVILKTVQLRNGNLQYDLHYWLGNECSQDESGAAAIFTVQLDDYLNGRAVQHREVQGFESSTFSGYFKSGLKYKKGGVASGFKHVVPNEVVVQRLFQVKGRRVVRATEVPVSWDSFNNGDCFILDLGNNIYQWCGSGSNKFERLKATQVSKGIRDNERSGRAQVHVSEEGGEPEAMLQVLGPKPALPEGTEDTAKEDAANRRLAKLYKVSNGAGSMSVSLVADENPFAQGALRSEDCFILDHGRDGKIFVWKGKQANMEERKAALKTASDFISKMQYPRQTQVSVLPEGGETPLFKQFFK	semi_Cterm	not_terminal	semi_specific	not_terminal	TMT-labelled	nterm	neo_termini	feature-specific	P13020_n[230]NWRDPDQTD	NWRDPDQTD	ETPLFKQFFK	GPGLGYLSSH	ETPLFKQFFKNWRDPDQTDGPGLGYLSSH	KNWRDPDQTDGPGLGYLSSH	20	29	10	10	10	10	KNWRDPDQTD | GPGLGYLSSH	DQTD | GPGL
Q9JL26_n[230]SVASGAEK	3.44319	10.6681	10.8135	5.57825e-06	0.00347366	3.70436	N - L	Frac07	n[230]SVASGAEK	SVASGAEK	Q9JL26	8K(229.1629), N-term(229.1629)	Q9JL26_n[230]SVASGAEK	Formin-like protein 1	1094	170	177	K	S	D	SKPLDQSVED	SVAYDMESTD	GNAAGSAEQPAGPTASPPKQPAVPKQPMPAAGELEERFTRVLNCMNLPPDKVQLLSQYDNEKKWELICDQERFQVKNPPAAYIQKLKSYLDTGGVSRKVASDWMSNLGFKRRVQESTQVLRELETSLRTNHIGWVQEFLNEENRGLDVLLEYLAFAQCSVAYDMESTD	semi_Nterm	not_terminal	semi_specific	not_terminal	TMT-labelled	nterm	neo_termini	feature-specific	Q9JL26_n[230]SVASGAEK	SVASGAEK	SVAYDMESTD	SKPLDQSVED	SVAYDMESTDSVASGAEKSKPLDQSVED	SVAYDMESTDSVASGAEKSK	20	28	10	10	10	10	SVAYDMESTD | SVASGAEKSK	ESTD | SVAS
P20152_n[230]VSKPDLTAALR	3.09228	8.12343	9.70569	1.23291e-05	0.00593877	3.20387	N - L	Frac07	n[230]VSKPDLTAALR	VSKPDLTAALR	P20152	3K(229.1629), N-term(229.1629)	P20152_n[230]VSKPDLTAALR	Vimentin	466	260	270	R	D	D	DVRQQYESVA	QEQHVQIDVD	STRSVSSSSYRRMFGGSGTSSRPSSNRSYVTTSTRTYSLGSALRPSTSRSLYSSSPGGAYVTRSSAVRLRSSVPGVRLLQDSVDFSLADAINTEFKNTRTNEKVELQELNDRFANYIDKVRFLEQQNKILLAELEQLKGQGKSRLGDLYEEEMRELRRQVDQLTNDKARVEVERDNLAEDIMRLREKLQEEMLQREEAESTLQSFRQDVDNASLARLDLERKVESLQEEIAFLKKLHDEEIQELQAQIQEQHVQIDVD	semi_Nterm	not_terminal	semi_specific	not_terminal	TMT-labelled	nterm	neo_termini	feature-specific	P20152_n[230]VSKPDLTAALR	VSKPDLTAALR	QEQHVQIDVD	DVRQQYESVA	QEQHVQIDVDVSKPDLTAALRDVRQQYESVA	QEQHVQIDVDVSKPDLTAAL	20	31	10	10	10	10	QEQHVQIDVD | VSKPDLTAAL	IDVD | VSKP
Q8VDD5_n[230]KGTGDCSDEEVD	4.61014	7.83527	8.1869	4.1935e-05	0.0140611	2.33458	N - L	Frac07	n[230]KGTGDCSDEEVD	KGTGDCSDEEVD	Q8VDD5	1K(229.1629), 6C(57.0214), N-term(229.1629)	Q8VDD5_n[230]KGTGDCSDEEVD	Myosin-9	1960	1937	1948	D	G	R	GKADGADAKA	PFVVTRRIVR	AQQAADKYLYVDKNFINNPLAQADWAAKKLVWVPSSKNGFEPASLKEEVGEEAIVELVENGKKVKVNKDDIQKMNPPKFSKVEDMAELTCLNEASVLHNLKERYYSGLIYTYSGLFCVVINPYKNLPIYSEEIVEMYKGKKRHEMPPHIYAITDTAYRSMMQDREDQSILCTGESGAGKTENTKKVIQYLAHVASSHKSKKDQGELERQLLQANPILEAFGNAKTVKNDNSSRFGKFIRINFDVNGYIVGANIETYLLEKSRAIRQAKEERTFHIFYYLLSGAGEHLKTDLLLEPYNKYRFLSNGHVTIPGQQDKDMFQETMEAMRIMGIPEDEQMGLLRVISGVLQLGNIAFKKERNTDQASMPDNTAAQKVSHLLGINVTDFTRGILTPRIKVGRDY…	semi_Cterm	not_terminal	semi_specific	not_terminal	TMT-labelled	nterm	neo_termini	feature-specific	Q8VDD5_n[230]KGTGDCSDEEVD	KGTGDCSDEEVD	PFVVTRRIVR	GKADGADAKA	PFVVTRRIVRKGTGDCSDEEVDGKADGADAKA	TGDCSDEEVDGKADGADAKA	20	32	10	10	10	10	TGDCSDEEVD | GKADGADAKA	EEVD | GKAD
P01901_n[230]GGDYALAPGSQTSDLSLPD	1.22703	7.93104	7.73729	6.24553e-05	0.0194459	1.80181	N - L	Frac07	n[230]GGDYALAPGSQTSDLSLPD	GGDYALAPGSQTSDLSLPD	P01901	N-term(229.1629)	P01901_n[230]GGDYALAPGSQTSDLSLPD	H-2 class I histocompatibility antigen, K-B alpha chain	369	339	357	D	C	K	CKVMVHDPHS	KMRRRNTGGK	VPCTLLLLLAAALAPTQTRAGPHSLRYFVTAVSRPGLGEPRYMEVGYVDDTEFVRFDSDAENPRYEPRARWMEQEGPEYWERETQKAKGNEQSFRVDLRTLLGYYNQSKGGSHTIQVISGCEVGSDGRLLRGYQQYAYDGCDYIALNEDLKTWTAADMAALITKHKWEQAGEAERLRAYLEGTCVEWLRRYLKNGNATLLRTDSPKAHVTHHSRPEDKVTLRCWALGFYPADITLTWQLNGEELIQDMELVETRPAGDGTFQKWASVVVPLGKEQYYTCHVYHQGLPEPLTLRWEPPPSTVSNMATVAVLVVLGAAIVTGAVVAFVMKMRRRNTGGK	semi_Cterm	not_terminal	semi_specific	not_terminal	TMT-labelled	nterm	neo_termini	feature-specific	P01901_n[230]GGDYALAPGSQTSDLSLPD	GGDYALAPGSQTSDLSLPD	KMRRRNTGGK	CKVMVHDPHS	KMRRRNTGGKGGDYALAPGSQTSDLSLPDCKVMVHDPHS	SQTSDLSLPDCKVMVHDPHS	20	39	10	10	10	10	SQTSDLSLPD | CKVMVHDPHS	SLPD | CKVM
Q61335_n[230]GAAEDGDKLD	1.17269	11.2066	7.40879	8.45454e-05	0.0245689	1.57703	N - L	Frac07	n[230]GAAEDGDKLD	GAAEDGDKLD	Q61335	8K(229.1629), N-term(229.1629)	Q61335_n[230]GAAEDGDKLD	B-cell receptor-associated protein 31	245	160	169	D	I	K	IGNTEMKLEE	YMEENDQLKK	SLQWTTVATFLYAEVFAVLLLCIPFISPKRWQKVFKSRLVELVVTYGNTFFVVLIVILVLLVIDAVREILKYDDVTEKVNLQNNPGAMEHFHMKLFRAQRNLYIAGFSLLLSFLLRRLVTLISQQATLLASNEAFKKQAESASEAAKKYMEENDQLKK	semi_Cterm	not_terminal	semi_specific	not_terminal	TMT-labelled	nterm	neo_termini	feature-specific	Q61335_n[230]GAAEDGDKLD	GAAEDGDKLD	YMEENDQLKK	IGNTEMKLEE	YMEENDQLKKGAAEDGDKLDIGNTEMKLEE	GAAEDGDKLDIGNTEMKLEE	20	30	10	10	10	10	GAAEDGDKLD | IGNTEMKLEE	DKLD | IGNT
P08113_n[230]GTVEEDLGK	1.49028	11.1604	6.95469	0.000130784	0.0335346	1.02989	N - L	Frac07	n[230]GTVEEDLGK	GTVEEDLGK	P08113	9K(229.1629), N-term(229.1629)	P08113_n[230]GTVEEDLGK	Endoplasmin	802	29	37	K	S	D	SREGSRTDDE	VRADDEVDVD	RVLWVLGLCCVLLTFGFVRADDEVDVD	semi_Nterm	not_terminal	semi_specific	not_terminal	TMT-labelled	nterm	neo_termini	feature-specific	P08113_n[230]GTVEEDLGK	GTVEEDLGK	VRADDEVDVD	SREGSRTDDE	VRADDEVDVDGTVEEDLGKSREGSRTDDE	VRADDEVDVDGTVEEDLGKS	20	29	10	10	10	10	VRADDEVDVD | GTVEEDLGKS	VDVD | GTVE
P20152_n[230]FSLADAINTEFK	4.32409	6.38398	6.33052	0.000247001	0.046812	0.915537	N - L	Frac07	n[230]FSLADAINTEFK	FSLADAINTEFK	P20152	12K(229.1629), N-term(229.1629)	P20152_n[230]FSLADAINTEFK	Vimentin	466	86	97	K	N	D	NTRTNEKVEL	GVRLLQDSVD	STRSVSSSSYRRMFGGSGTSSRPSSNRSYVTTSTRTYSLGSALRPSTSRSLYSSSPGGAYVTRSSAVRLRSSVPGVRLLQDSVD	semi_Nterm	not_terminal	semi_specific	not_terminal	TMT-labelled	nterm	neo_termini	feature-specific	P20152_n[230]FSLADAINTEFK	FSLADAINTEFK	GVRLLQDSVD	NTRTNEKVEL	GVRLLQDSVDFSLADAINTEFKNTRTNEKVEL	GVRLLQDSVDFSLADAINTE	20	32	10	10	10	10	GVRLLQDSVD | FSLADAINTE	DSVD | FSLA
P20152_n[230]VDVSKPDLTAALR	5.26154	9.33241	16.5637	2.25417e-07	0.000245648	6.45554	T - L	Frac07	n[230]VDVSKPDLTAALR	VDVSKPDLTAALR	P20152	5K(229.1629), N-term(229.1629)	P20152_n[230]VDVSKPDLTAALR	Vimentin	466	258	270	R	D	D	DVRQQYESVA	QIQEQHVQID	STRSVSSSSYRRMFGGSGTSSRPSSNRSYVTTSTRTYSLGSALRPSTSRSLYSSSPGGAYVTRSSAVRLRSSVPGVRLLQDSVDFSLADAINTEFKNTRTNEKVELQELNDRFANYIDKVRFLEQQNKILLAELEQLKGQGKSRLGDLYEEEMRELRRQVDQLTNDKARVEVERDNLAEDIMRLREKLQEEMLQREEAESTLQSFRQDVDNASLARLDLERKVESLQEEIAFLKKLHDEEIQELQAQIQEQHVQID	semi_Nterm	not_terminal	semi_specific	not_terminal	TMT-labelled	nterm	neo_termini	feature-specific	P20152_n[230]VDVSKPDLTAALR	VDVSKPDLTAALR	QIQEQHVQID	DVRQQYESVA	QIQEQHVQIDVDVSKPDLTAALRDVRQQYESVA	QIQEQHVQIDVDVSKPDLTA	20	33	10	10	10	10	QIQEQHVQID | VDVSKPDLTA	VQID | VDVS
Q64337_n[230]SNTQPSSCSSEVSKPD	4.00869	12.7216	17.2091	1.68339e-07	0.000244596	6.06337	T - L	Frac07	n[230]SNTQPSSCSSEVSKPD	SNTQPSSCSSEVSKPD	Q64337	14K(229.1629), 8C(57.0214), N-term(229.1629)	Q64337_n[230]SNTQPSSCSSEVSKPD	Sequestosome-1	442	284	299	D	G	K	GAGEGPAQSL	ESSSTGTEDK	ASFTVKAYLLGKEEATREIRRFSFCFSPEPEAEAQAAAGPGPCERLLSRVAVLFPTLRPGGFQAHYRDEDGDLVAFSSDEELTMAMSYVKDDIFRIYIKEKKECRREHRPPCAQEAPRNMVHPNVICDGCNGPVVGTRYKCSVCPDYDLCSVCEGKGLHREHSKLIFPNPFGHLSDSFSHSRWLRKLKHGHFGWPGWEMGPPGNWSPRPPRAGDGRPCPTAESASAPPEDPNVNFLKNVGESVAAALSPLGIEVDIDVEHGGKRSRLTPTTPESSSTGTEDK	semi_Cterm	not_terminal	semi_specific	not_terminal	TMT-labelled	nterm	neo_termini	feature-specific	Q64337_n[230]SNTQPSSCSSEVSKPD	SNTQPSSCSSEVSKPD	ESSSTGTEDK	GAGEGPAQSL	ESSSTGTEDKSNTQPSSCSSEVSKPDGAGEGPAQSL	SCSSEVSKPDGAGEGPAQSL	20	36	10	10	10	10	SCSSEVSKPD | GAGEGPAQSL	SKPD | GAGE
Q61335_n[230]GAAEDGDKLD	2.13467	11.2066	14.8123	5.27616e-07	0.000405548	5.62237	T - L	Frac07	n[230]GAAEDGDKLD	GAAEDGDKLD	Q61335	8K(229.1629), N-term(229.1629)	Q61335_n[230]GAAEDGDKLD	B-cell receptor-associated protein 31	245	160	169	D	I	K	IGNTEMKLEE	YMEENDQLKK	SLQWTTVATFLYAEVFAVLLLCIPFISPKRWQKVFKSRLVELVVTYGNTFFVVLIVILVLLVIDAVREILKYDDVTEKVNLQNNPGAMEHFHMKLFRAQRNLYIAGFSLLLSFLLRRLVTLISQQATLLASNEAFKKQAESASEAAKKYMEENDQLKK	semi_Cterm	not_terminal	semi_specific	not_terminal	TMT-labelled	nterm	neo_termini	feature-specific	Q61335_n[230]GAAEDGDKLD	GAAEDGDKLD	YMEENDQLKK	IGNTEMKLEE	YMEENDQLKKGAAEDGDKLDIGNTEMKLEE	GAAEDGDKLDIGNTEMKLEE	20	30	10	10	10	10	GAAEDGDKLD | IGNTEMKLEE	DKLD | IGNT
P13020_n[230]NWRDPDQTD	1.81359	14.2815	10.6531	6.22854e-06	0.00301669	4.01514	T - L	Frac07	n[230]NWRDPDQTD	NWRDPDQTD	P13020	N-term(229.1629)	P13020_n[230]NWRDPDQTD	Gelsolin	780	393	401	D	G	K	GPGLGYLSSH	ETPLFKQFFK	APYRSSLLCALLLLALCALSPSHAATTSRGRAQERAPQSRVSEARPSTMVVEHPEFLKAGKEPGLQIWRVEKFDLVPVPPNLYGDFFTGDAYVILKTVQLRNGNLQYDLHYWLGNECSQDESGAAAIFTVQLDDYLNGRAVQHREVQGFESSTFSGYFKSGLKYKKGGVASGFKHVVPNEVVVQRLFQVKGRRVVRATEVPVSWDSFNNGDCFILDLGNNIYQWCGSGSNKFERLKATQVSKGIRDNERSGRAQVHVSEEGGEPEAMLQVLGPKPALPEGTEDTAKEDAANRRLAKLYKVSNGAGSMSVSLVADENPFAQGALRSEDCFILDHGRDGKIFVWKGKQANMEERKAALKTASDFISKMQYPRQTQVSVLPEGGETPLFKQFFK	semi_Cterm	not_terminal	semi_specific	not_terminal	TMT-labelled	nterm	neo_termini	feature-specific	P13020_n[230]NWRDPDQTD	NWRDPDQTD	ETPLFKQFFK	GPGLGYLSSH	ETPLFKQFFKNWRDPDQTDGPGLGYLSSH	KNWRDPDQTDGPGLGYLSSH	20	29	10	10	10	10	KNWRDPDQTD | GPGLGYLSSH	DQTD | GPGL
Q8VDD5_n[230]KGTGDCSDEEVD	5.59387	7.83527	10.1128	9.13125e-06	0.00398031	3.879	T - L	Frac07	n[230]KGTGDCSDEEVD	KGTGDCSDEEVD	Q8VDD5	1K(229.1629), 6C(57.0214), N-term(229.1629)	Q8VDD5_n[230]KGTGDCSDEEVD	Myosin-9	1960	1937	1948	D	G	R	GKADGADAKA	PFVVTRRIVR	AQQAADKYLYVDKNFINNPLAQADWAAKKLVWVPSSKNGFEPASLKEEVGEEAIVELVENGKKVKVNKDDIQKMNPPKFSKVEDMAELTCLNEASVLHNLKERYYSGLIYTYSGLFCVVINPYKNLPIYSEEIVEMYKGKKRHEMPPHIYAITDTAYRSMMQDREDQSILCTGESGAGKTENTKKVIQYLAHVASSHKSKKDQGELERQLLQANPILEAFGNAKTVKNDNSSRFGKFIRINFDVNGYIVGANIETYLLEKSRAIRQAKEERTFHIFYYLLSGAGEHLKTDLLLEPYNKYRFLSNGHVTIPGQQDKDMFQETMEAMRIMGIPEDEQMGLLRVISGVLQLGNIAFKKERNTDQASMPDNTAAQKVSHLLGINVTDFTRGILTPRIKVGRDY…	semi_Cterm	not_terminal	semi_specific	not_terminal	TMT-labelled	nterm	neo_termini	feature-specific	Q8VDD5_n[230]KGTGDCSDEEVD	KGTGDCSDEEVD	PFVVTRRIVR	GKADGADAKA	PFVVTRRIVRKGTGDCSDEEVDGKADGADAKA	TGDCSDEEVDGKADGADAKA	20	32	10	10	10	10	TGDCSDEEVD | GKADGADAKA	EEVD | GKAD
P01901_n[230]GGDYALAPGSQTSDLSLPD	2.01928	7.93104	11.1989	4.30478e-06	0.00234557	3.77438	T - L	Frac07	n[230]GGDYALAPGSQTSDLSLPD	GGDYALAPGSQTSDLSLPD	P01901	N-term(229.1629)	P01901_n[230]GGDYALAPGSQTSDLSLPD	H-2 class I histocompatibility antigen, K-B alpha chain	369	339	357	D	C	K	CKVMVHDPHS	KMRRRNTGGK	VPCTLLLLLAAALAPTQTRAGPHSLRYFVTAVSRPGLGEPRYMEVGYVDDTEFVRFDSDAENPRYEPRARWMEQEGPEYWERETQKAKGNEQSFRVDLRTLLGYYNQSKGGSHTIQVISGCEVGSDGRLLRGYQQYAYDGCDYIALNEDLKTWTAADMAALITKHKWEQAGEAERLRAYLEGTCVEWLRRYLKNGNATLLRTDSPKAHVTHHSRPEDKVTLRCWALGFYPADITLTWQLNGEELIQDMELVETRPAGDGTFQKWASVVVPLGKEQYYTCHVYHQGLPEPLTLRWEPPPSTVSNMATVAVLVVLGAAIVTGAVVAFVMKMRRRNTGGK	semi_Cterm	not_terminal	semi_specific	not_terminal	TMT-labelled	nterm	neo_termini	feature-specific	P01901_n[230]GGDYALAPGSQTSDLSLPD	GGDYALAPGSQTSDLSLPD	KMRRRNTGGK	CKVMVHDPHS	KMRRRNTGGKGGDYALAPGSQTSDLSLPDCKVMVHDPHS	SQTSDLSLPDCKVMVHDPHS	20	39	10	10	10	10	SQTSDLSLPD | CKVMVHDPHS	SLPD | CKVM
Q9JL26_n[230]SVASGAEK	2.65779	10.6681	8.56255	3.04691e-05	0.0120741	2.89187	T - L	Frac07	n[230]SVASGAEK	SVASGAEK	Q9JL26	8K(229.1629), N-term(229.1629)	Q9JL26_n[230]SVASGAEK	Formin-like protein 1	1094	170	177	K	S	D	SKPLDQSVED	SVAYDMESTD	GNAAGSAEQPAGPTASPPKQPAVPKQPMPAAGELEERFTRVLNCMNLPPDKVQLLSQYDNEKKWELICDQERFQVKNPPAAYIQKLKSYLDTGGVSRKVASDWMSNLGFKRRVQESTQVLRELETSLRTNHIGWVQEFLNEENRGLDVLLEYLAFAQCSVAYDMESTD	semi_Nterm	not_terminal	semi_specific	not_terminal	TMT-labelled	nterm	neo_termini	feature-specific	Q9JL26_n[230]SVASGAEK	SVASGAEK	SVAYDMESTD	SKPLDQSVED	SVAYDMESTDSVASGAEKSKPLDQSVED	SVAYDMESTDSVASGAEKSK	20	28	10	10	10	10	SVAYDMESTD | SVASGAEKSK	ESTD | SVAS
P08113_n[230]GTVEEDLGK	1.37112	11.1604	7.91882	5.30608e-05	0.0181874	2.334	T - L	Frac07	n[230]GTVEEDLGK	GTVEEDLGK	P08113	9K(229.1629), N-term(229.1629)	P08113_n[230]GTVEEDLGK	Endoplasmin	802	29	37	K	S	D	SREGSRTDDE	VRADDEVDVD	RVLWVLGLCCVLLTFGFVRADDEVDVD	semi_Nterm	not_terminal	semi_specific	not_terminal	TMT-labelled	nterm	neo_termini	feature-specific	P08113_n[230]GTVEEDLGK	GTVEEDLGK	VRADDEVDVD	SREGSRTDDE	VRADDEVDVDGTVEEDLGKSREGSRTDDE	VRADDEVDVDGTVEEDLGKS	20	29	10	10	10	10	VRADDEVDVD | GTVEEDLGKS	VDVD | GTVE
Q64337_n[230]NVGESVAAALSPLGIEVD	4.89908	15.1807	6.83949	0.000146591	0.0375877	1.50623	T - L	Frac07	n[230]NVGESVAAALSPLGIEVD	NVGESVAAALSPLGIEVD	Q64337	N-term(229.1629)	Q64337_n[230]NVGESVAAALSPLGIEVD	Sequestosome-1	442	239	256	D	I	K	IDVEHGGKRS	PEDPNVNFLK	ASFTVKAYLLGKEEATREIRRFSFCFSPEPEAEAQAAAGPGPCERLLSRVAVLFPTLRPGGFQAHYRDEDGDLVAFSSDEELTMAMSYVKDDIFRIYIKEKKECRREHRPPCAQEAPRNMVHPNVICDGCNGPVVGTRYKCSVCPDYDLCSVCEGKGLHREHSKLIFPNPFGHLSDSFSHSRWLRKLKHGHFGWPGWEMGPPGNWSPRPPRAGDGRPCPTAESASAPPEDPNVNFLK	semi_Cterm	not_terminal	semi_specific	not_terminal	TMT-labelled	nterm	neo_termini	feature-specific	Q64337_n[230]NVGESVAAALSPLGIEVD	NVGESVAAALSPLGIEVD	PEDPNVNFLK	IDVEHGGKRS	PEDPNVNFLKNVGESVAAALSPLGIEVDIDVEHGGKRS	ALSPLGIEVDIDVEHGGKRS	20	38	10	10	10	10	ALSPLGIEVD | IDVEHGGKRS	IEVD | IDVE
P20152_n[230]VSKPDLTAALR	1.98188	8.12343	6.58533	0.000189525	0.03934	1.27171	T - L	Frac07	n[230]VSKPDLTAALR	VSKPDLTAALR	P20152	3K(229.1629), N-term(229.1629)	P20152_n[230]VSKPDLTAALR	Vimentin	466	260	270	R	D	D	DVRQQYESVA	QEQHVQIDVD	STRSVSSSSYRRMFGGSGTSSRPSSNRSYVTTSTRTYSLGSALRPSTSRSLYSSSPGGAYVTRSSAVRLRSSVPGVRLLQDSVDFSLADAINTEFKNTRTNEKVELQELNDRFANYIDKVRFLEQQNKILLAELEQLKGQGKSRLGDLYEEEMRELRRQVDQLTNDKARVEVERDNLAEDIMRLREKLQEEMLQREEAESTLQSFRQDVDNASLARLDLERKVESLQEEIAFLKKLHDEEIQELQAQIQEQHVQIDVD	semi_Nterm	not_terminal	semi_specific	not_terminal	TMT-labelled	nterm	neo_termini	feature-specific	P20152_n[230]VSKPDLTAALR	VSKPDLTAALR	QEQHVQIDVD	DVRQQYESVA	QEQHVQIDVDVSKPDLTAALRDVRQQYESVA	QEQHVQIDVDVSKPDLTAAL	20	31	10	10	10	10	QEQHVQIDVD | VSKPDLTAAL	IDVD | VSKP
P20152_n[230]FSLADAINTEFK	4.59805	5.01963	9.1867	1.83382e-05	0.0176689	3.22364	N - L	Frac08	n[230]FSLADAINTEFK	FSLADAINTEFK	P20152	12K(229.1629), N-term(229.1629)	P20152_n[230]FSLADAINTEFK	Vimentin	466	86	97	K	N	D	NTRTNEKVEL	GVRLLQDSVD	STRSVSSSSYRRMFGGSGTSSRPSSNRSYVTTSTRTYSLGSALRPSTSRSLYSSSPGGAYVTRSSAVRLRSSVPGVRLLQDSVD	semi_Nterm	not_terminal	semi_specific	not_terminal	TMT-labelled	nterm	neo_termini	feature-specific	P20152_n[230]FSLADAINTEFK	FSLADAINTEFK	GVRLLQDSVD	NTRTNEKVEL	GVRLLQDSVDFSLADAINTEFKNTRTNEKVEL	GVRLLQDSVDFSLADAINTE	20	32	10	10	10	10	GVRLLQDSVD | FSLADAINTE	DSVD | FSLA
P20152_n[230]VDVSKPDLTAALR	6.29877	9.0211	8.5962	2.95745e-05	0.0179499	2.90001	N - L	Frac08	n[230]VDVSKPDLTAALR	VDVSKPDLTAALR	P20152	5K(229.1629), N-term(229.1629)	P20152_n[230]VDVSKPDLTAALR	Vimentin	466	258	270	R	D	D	DVRQQYESVA	QIQEQHVQID	STRSVSSSSYRRMFGGSGTSSRPSSNRSYVTTSTRTYSLGSALRPSTSRSLYSSSPGGAYVTRSSAVRLRSSVPGVRLLQDSVDFSLADAINTEFKNTRTNEKVELQELNDRFANYIDKVRFLEQQNKILLAELEQLKGQGKSRLGDLYEEEMRELRRQVDQLTNDKARVEVERDNLAEDIMRLREKLQEEMLQREEAESTLQSFRQDVDNASLARLDLERKVESLQEEIAFLKKLHDEEIQELQAQIQEQHVQID	semi_Nterm	not_terminal	semi_specific	not_terminal	TMT-labelled	nterm	neo_termini	feature-specific	P20152_n[230]VDVSKPDLTAALR	VDVSKPDLTAALR	QIQEQHVQID	DVRQQYESVA	QIQEQHVQIDVDVSKPDLTAALRDVRQQYESVA	QIQEQHVQIDVDVSKPDLTA	20	33	10	10	10	10	QIQEQHVQID | VDVSKPDLTA	VQID | VDVS
Q99MN9_n[230]EFFNFLPLSSQD	1.23409	8.77767	8.47974	3.26023e-05	0.0179499	2.75081	N - L	Frac08	n[230]EFFNFLPLSSQD	EFFNFLPLSSQD	Q99MN9	N-term(229.1629)	Q99MN9_n[230]EFFNFLPLSSQD	Propionyl-CoA carboxylase beta chain, mitochondrial	541	275	286	D	P	R	PAPIRECHDP	NDVDALCNLR	AAAIRIRAVAAGARLSVLNCGLGITTRGLCSQPVSVKERIDNKRHAALLGGGQRRIDAQHKRGKLTARERISLLLDPGSFMESDMFVEHRCADFGMAADKNKFPGDSVVTGRGRINGRLVYVFSQDFTVFGGSLSGAHAQKICKIMDQAITVGAPVIGLNDSGGARIQEGVESLAGYADIFLRNVTASGVIPQISLIMGPCAGGAVYSPALTDFTFMVKDTSYLFITGPEVVKSVTNEDVTQEQLGGAKTHTTVSGVAHRAFDNDVDALCNLR	semi_Cterm	not_terminal	semi_specific	not_terminal	TMT-labelled	nterm	neo_termini	feature-specific	Q99MN9_n[230]EFFNFLPLSSQD	EFFNFLPLSSQD	NDVDALCNLR	PAPIRECHDP	NDVDALCNLREFFNFLPLSSQDPAPIRECHDP	FNFLPLSSQDPAPIRECHDP	20	32	10	10	10	10	FNFLPLSSQD | PAPIRECHDP	SSQD | PAPI
Q68FL4_n[230]GTVTEAPR	2.1555	24.7518	7.75927	6.11283e-05	0.0230479	2.2539	N - L	Frac08	n[230]GTVTEAPR	GTVTEAPR	Q68FL4	N-term(229.1629)	Q68FL4_n[230]GTVTEAPR	Putative adenosylhomocysteinase 3	613	112	119	R	T	D	TVKKQIQFAD	DGGEALVSPD	SVQVVSAAAAAKVPEVELKDLSPSEAEPQLGLSAAAVGAMVPPAGGGDPEAPAPAPAAERPPAPGPGSGPTAALSPAAGKVPQASAMKRSDPHHQHQRHRDGGEALVSPD	semi_Nterm	not_terminal	semi_specific	not_terminal	TMT-labelled	nterm	neo_termini	feature-specific	Q68FL4_n[230]GTVTEAPR	GTVTEAPR	DGGEALVSPD	TVKKQIQFAD	DGGEALVSPDGTVTEAPRTVKKQIQFAD	DGGEALVSPDGTVTEAPRTV	20	28	10	10	10	10	DGGEALVSPD | GTVTEAPRTV	VSPD | GTVT
Q5SSH7_n[230]ALALLGVLPD	1.27069	9.64781	6.98518	0.000126748	0.0257098	1.54442	N - L	Frac08	n[230]ALALLGVLPD	ALALLGVLPD	Q5SSH7	N-term(229.1629)	Q5SSH7_n[230]ALALLGVLPD	Zinc finger ZZ-type and EF-hand domain-containing protein 1	2924	1956	1965	D	G	K	GDSTSENQAL	MKAHQGKGLK	GNAPSNSSEDEAAAAGGEGWSPHQDWAADSGTTPGPGPAAAVLPSAAALLEPARLREAAAALRPAPPCESLVSRHHGALLRWLEERLGRGEESVTLEQFRELLEARGAGCSGEQFEEAFAQFDAEGDGTVDAENMLEALKNSSGANLQGELSHVIRQLQACSLVPGFIDIFSESKEGLGIHSSMILRFLHRNRISSMVIPYPMLDHCNNMCTMRSSVLKESLDQLVQKEKESPGDLARSPEMDKLKSVTKCYAYIETSSNPADIYRMTNGETSSYWQSDGSARSHWIRLKMKPDVVLRHLSIAVAATDQSYMPQQVTVAVGRSASDLQEVRDVHIPSNVTGYVTLLENANISQLYVQINIKRCLSDGCDTRIHGLRAVGFQRVKKSGVSVSDASAIWYW…	semi_Cterm	not_terminal	semi_specific	not_terminal	TMT-labelled	nterm	neo_termini	feature-specific	Q5SSH7_n[230]ALALLGVLPD	ALALLGVLPD	MKAHQGKGLK	GDSTSENQAL	MKAHQGKGLKALALLGVLPDGDSTSENQAL	ALALLGVLPDGDSTSENQAL	20	30	10	10	10	10	ALALLGVLPD | GDSTSENQAL	VLPD | GDST
P20152_n[230]FSLADAINTEFK	4.47881	5.01963	9.36367	1.59715e-05	0.010259	3.34184	T - L	Frac08	n[230]FSLADAINTEFK	FSLADAINTEFK	P20152	12K(229.1629), N-term(229.1629)	P20152_n[230]FSLADAINTEFK	Vimentin	466	86	97	K	N	D	NTRTNEKVEL	GVRLLQDSVD	STRSVSSSSYRRMFGGSGTSSRPSSNRSYVTTSTRTYSLGSALRPSTSRSLYSSSPGGAYVTRSSAVRLRSSVPGVRLLQDSVD	semi_Nterm	not_terminal	semi_specific	not_terminal	TMT-labelled	nterm	neo_termini	feature-specific	P20152_n[230]FSLADAINTEFK	FSLADAINTEFK	GVRLLQDSVD	NTRTNEKVEL	GVRLLQDSVDFSLADAINTEFKNTRTNEKVEL	GVRLLQDSVDFSLADAINTE	20	32	10	10	10	10	GVRLLQDSVD | FSLADAINTE	DSVD | FSLA
P20152_n[230]VDVSKPDLTAALR	5.46389	9.0211	7.4568	8.07113e-05	0.0340803	2.00893	T - L	Frac08	n[230]VDVSKPDLTAALR	VDVSKPDLTAALR	P20152	5K(229.1629), N-term(229.1629)	P20152_n[230]VDVSKPDLTAALR	Vimentin	466	258	270	R	D	D	DVRQQYESVA	QIQEQHVQID	STRSVSSSSYRRMFGGSGTSSRPSSNRSYVTTSTRTYSLGSALRPSTSRSLYSSSPGGAYVTRSSAVRLRSSVPGVRLLQDSVDFSLADAINTEFKNTRTNEKVELQELNDRFANYIDKVRFLEQQNKILLAELEQLKGQGKSRLGDLYEEEMRELRRQVDQLTNDKARVEVERDNLAEDIMRLREKLQEEMLQREEAESTLQSFRQDVDNASLARLDLERKVESLQEEIAFLKKLHDEEIQELQAQIQEQHVQID	semi_Nterm	not_terminal	semi_specific	not_terminal	TMT-labelled	nterm	neo_termini	feature-specific	P20152_n[230]VDVSKPDLTAALR	VDVSKPDLTAALR	QIQEQHVQID	DVRQQYESVA	QIQEQHVQIDVDVSKPDLTAALRDVRQQYESVA	QIQEQHVQIDVDVSKPDLTA	20	33	10	10	10	10	QIQEQHVQID | VDVSKPDLTA	VQID | VDVS
E9Q616_n[230]VDIDVPD	1.63279	12.4035	8.13734	4.40346e-05	0.0130416	2.68744	N - L	Frac09	n[230]VDIDVPD	VDIDVPD	E9Q616	N-term(229.1629)	E9Q616_n[230]VDIDVPD	AHNAK nucleoprotein (desmoyokin)	5656	1287	1293	D	V	K	VNIEGPDAKL	KADLDVSGPK	EKEEETTRELLLPNWQGSGSHGLTIAQRDDGVFVQEVMQNSPAARTGVVKEGDQIVGATIYFDNLQSGEVTQLLNTMGHHTVGLKLHRKGDRSPEPGQTWTHEVFSSRSSEVVLSGDDEDYQRIYTTKIKPRLRSEDGVEGDLGETQSRTITVTRRVTAYTVDVTGREGVKDIDITSPEFMIKIPRHEVTEISNTDVETQPGKTVIRLPSGSGPASPTTGSAVDIRAGAISASGPELEGAGHSKFQVTVPGAKVGSLDVNVKAKGLDLGGKGGIRVPGVDVSSSLGAGSVEVQAPSLQSGDIGKIKIPTMKVPKFGVSAGLDGQIPEVGLSVSAPESSVGHKGDKPGLAIGGNIQAPHLEVNPSSVNIEGLEGKLKGPQITGPSLEGDLGLKGTKLQGN…	semi_Cterm	not_terminal	semi_specific	not_terminal	TMT-labelled	nterm	neo_termini	feature-specific	E9Q616_n[230]VDIDVPD	VDIDVPD	KADLDVSGPK	VNIEGPDAKL	KADLDVSGPKVDIDVPDVNIEGPDAKL	GPKVDIDVPDVNIEGPDAKL	20	27	10	10	10	10	GPKVDIDVPD | VNIEGPDAKL	DVPD | VNIE
P20152_n[230]FSLADAINTEFK	1.38354	4.79618	7.56137	7.37512e-05	0.0145618	2.18936	N - L	Frac09	n[230]FSLADAINTEFK	FSLADAINTEFK	P20152	12K(229.1629), N-term(229.1629)	P20152_n[230]FSLADAINTEFK	Vimentin	466	86	97	K	N	D	NTRTNEKVEL	GVRLLQDSVD	STRSVSSSSYRRMFGGSGTSSRPSSNRSYVTTSTRTYSLGSALRPSTSRSLYSSSPGGAYVTRSSAVRLRSSVPGVRLLQDSVD	semi_Nterm	not_terminal	semi_specific	not_terminal	TMT-labelled	nterm	neo_termini	feature-specific	P20152_n[230]FSLADAINTEFK	FSLADAINTEFK	GVRLLQDSVD	NTRTNEKVEL	GVRLLQDSVDFSLADAINTEFKNTRTNEKVEL	GVRLLQDSVDFSLADAINTE	20	32	10	10	10	10	GVRLLQDSVD | FSLADAINTE	DSVD | FSLA
Q8VDD5_n[230]KGTGDCSDEEVD	6.15315	5.05696	6.87022	0.000142856	0.0188041	1.51296	N - L	Frac09	n[230]KGTGDCSDEEVD	KGTGDCSDEEVD	Q8VDD5	1K(229.1629), 6C(57.0214), N-term(229.1629)	Q8VDD5_n[230]KGTGDCSDEEVD	Myosin-9	1960	1937	1948	D	G	R	GKADGADAKA	PFVVTRRIVR	AQQAADKYLYVDKNFINNPLAQADWAAKKLVWVPSSKNGFEPASLKEEVGEEAIVELVENGKKVKVNKDDIQKMNPPKFSKVEDMAELTCLNEASVLHNLKERYYSGLIYTYSGLFCVVINPYKNLPIYSEEIVEMYKGKKRHEMPPHIYAITDTAYRSMMQDREDQSILCTGESGAGKTENTKKVIQYLAHVASSHKSKKDQGELERQLLQANPILEAFGNAKTVKNDNSSRFGKFIRINFDVNGYIVGANIETYLLEKSRAIRQAKEERTFHIFYYLLSGAGEHLKTDLLLEPYNKYRFLSNGHVTIPGQQDKDMFQETMEAMRIMGIPEDEQMGLLRVISGVLQLGNIAFKKERNTDQASMPDNTAAQKVSHLLGINVTDFTRGILTPRIKVGRDY…	semi_Cterm	not_terminal	semi_specific	not_terminal	TMT-labelled	nterm	neo_termini	feature-specific	Q8VDD5_n[230]KGTGDCSDEEVD	KGTGDCSDEEVD	PFVVTRRIVR	GKADGADAKA	PFVVTRRIVRKGTGDCSDEEVDGKADGADAKA	TGDCSDEEVDGKADGADAKA	20	32	10	10	10	10	TGDCSDEEVD | GKADGADAKA	EEVD | GKAD
P68254_n[230]DNLTLWTSDSAGEECD	1.70637	11.5505	5.59422	0.00055707	0.0412464	0.15083	N - L	Frac09	n[230]DNLTLWTSDSAGEECD	DNLTLWTSDSAGEECD	P68254	15C(57.0214), N-term(229.1629)	P68254_n[230]DNLTLWTSDSAGEECD	14-3-3 protein theta	245	223	238	D	A	R	AAEGAEN	DSTLIMQLLR	EKTELIQKAKLAEQAERYDDMATCMKAVTEQGAELSNEERNLLSVAYKNVVGGRRSAWRVISSIEQKTDTSDKKLQLIKDYREKVESELRSICTTVLELLDKYLIANATNPESKVFYLKMKGDYFRYLAEVACGDDRKQTIENSQGAYQEAFDISKKEMQPTHPIRLGLALNFSVFYYEILNNPELACTLAKTAFDEAIAELDTLNEDSYKDSTLIMQLLR	semi_Cterm	not_terminal	semi_specific	not_terminal	TMT-labelled	nterm	neo_termini	feature-specific	P68254_n[230]DNLTLWTSDSAGEECD	DNLTLWTSDSAGEECD	DSTLIMQLLR	AAEGAENXXX	DSTLIMQLLRDNLTLWTSDSAGEECDAAEGAENXXX	TSDSAGEECDAAEGAENXXX	20	36	7	10	10	10	TSDSAGEECD | AAEGAENXXX	EECD | AAEG
P68254_n[230]DNLTLWTSDSAGEECD	2.08881	11.5505	6.84801	0.000146044	0.027318	1.52828	T - L	Frac09	n[230]DNLTLWTSDSAGEECD	DNLTLWTSDSAGEECD	P68254	15C(57.0214), N-term(229.1629)	P68254_n[230]DNLTLWTSDSAGEECD	14-3-3 protein theta	245	223	238	D	A	R	AAEGAEN	DSTLIMQLLR	EKTELIQKAKLAEQAERYDDMATCMKAVTEQGAELSNEERNLLSVAYKNVVGGRRSAWRVISSIEQKTDTSDKKLQLIKDYREKVESELRSICTTVLELLDKYLIANATNPESKVFYLKMKGDYFRYLAEVACGDDRKQTIENSQGAYQEAFDISKKEMQPTHPIRLGLALNFSVFYYEILNNPELACTLAKTAFDEAIAELDTLNEDSYKDSTLIMQLLR	semi_Cterm	not_terminal	semi_specific	not_terminal	TMT-labelled	nterm	neo_termini	feature-specific	P68254_n[230]DNLTLWTSDSAGEECD	DNLTLWTSDSAGEECD	DSTLIMQLLR	AAEGAENXXX	DSTLIMQLLRDNLTLWTSDSAGEECDAAEGAENXXX	TSDSAGEECDAAEGAENXXX	20	36	7	10	10	10	TSDSAGEECD | AAEGAENXXX	EECD | AAEG
O88569_n[230]GFGFVTFDDHDPVD	1.04876	3.3091	6.73797	0.000163049	0.0275941	1.42173	T - L	Frac09	n[230]GFGFVTFDDHDPVD	GFGFVTFDDHDPVD	O88569	N-term(229.1629)	O88569_n[230]GFGFVTFDDHDPVD	Heterogeneous nuclear ribonucleoproteins A2/B1	353	154	167	D	K	R	KIVLQKYHTI	ITDRQSGKKR	EKTLETVPLERKKREKEQFRKLFIGGLSFETTEESLRNYYEQWGKLTDCVVMRDPASKRSRGFGFVTFSSMAEVDAAMAARPHSIDGRVVEPKRAVAREESGKPGAHVTVKKLFVGGIKEDTEEHHLRDYFEEYGKIDTIEIITDRQSGKKR	semi_Cterm	not_terminal	semi_specific	not_terminal	TMT-labelled	nterm	neo_termini	feature-specific	O88569_n[230]GFGFVTFDDHDPVD	GFGFVTFDDHDPVD	ITDRQSGKKR	KIVLQKYHTI	ITDRQSGKKRGFGFVTFDDHDPVDKIVLQKYHTI	VTFDDHDPVDKIVLQKYHTI	20	34	10	10	10	10	VTFDDHDPVD | KIVLQKYHTI	DPVD | KIVL
E9Q616_n[230]VDIDVPD	1.25415	12.4035	6.42633	0.000224371	0.029879	1.08873	T - L	Frac09	n[230]VDIDVPD	VDIDVPD	E9Q616	N-term(229.1629)	E9Q616_n[230]VDIDVPD	AHNAK nucleoprotein (desmoyokin)	5656	1287	1293	D	V	K	VNIEGPDAKL	KADLDVSGPK	EKEEETTRELLLPNWQGSGSHGLTIAQRDDGVFVQEVMQNSPAARTGVVKEGDQIVGATIYFDNLQSGEVTQLLNTMGHHTVGLKLHRKGDRSPEPGQTWTHEVFSSRSSEVVLSGDDEDYQRIYTTKIKPRLRSEDGVEGDLGETQSRTITVTRRVTAYTVDVTGREGVKDIDITSPEFMIKIPRHEVTEISNTDVETQPGKTVIRLPSGSGPASPTTGSAVDIRAGAISASGPELEGAGHSKFQVTVPGAKVGSLDVNVKAKGLDLGGKGGIRVPGVDVSSSLGAGSVEVQAPSLQSGDIGKIKIPTMKVPKFGVSAGLDGQIPEVGLSVSAPESSVGHKGDKPGLAIGGNIQAPHLEVNPSSVNIEGLEGKLKGPQITGPSLEGDLGLKGTKLQGN…	semi_Cterm	not_terminal	semi_specific	not_terminal	TMT-labelled	nterm	neo_termini	feature-specific	E9Q616_n[230]VDIDVPD	VDIDVPD	KADLDVSGPK	VNIEGPDAKL	KADLDVSGPKVDIDVPDVNIEGPDAKL	GPKVDIDVPDVNIEGPDAKL	20	27	10	10	10	10	GPKVDIDVPD | VNIEGPDAKL	DVPD | VNIE
Q8VDD5_n[230]KGTGDCSDEEVD	5.26097	5.05696	6.09803	0.000317934	0.0389633	0.738854	T - L	Frac09	n[230]KGTGDCSDEEVD	KGTGDCSDEEVD	Q8VDD5	1K(229.1629), 6C(57.0214), N-term(229.1629)	Q8VDD5_n[230]KGTGDCSDEEVD	Myosin-9	1960	1937	1948	D	G	R	GKADGADAKA	PFVVTRRIVR	AQQAADKYLYVDKNFINNPLAQADWAAKKLVWVPSSKNGFEPASLKEEVGEEAIVELVENGKKVKVNKDDIQKMNPPKFSKVEDMAELTCLNEASVLHNLKERYYSGLIYTYSGLFCVVINPYKNLPIYSEEIVEMYKGKKRHEMPPHIYAITDTAYRSMMQDREDQSILCTGESGAGKTENTKKVIQYLAHVASSHKSKKDQGELERQLLQANPILEAFGNAKTVKNDNSSRFGKFIRINFDVNGYIVGANIETYLLEKSRAIRQAKEERTFHIFYYLLSGAGEHLKTDLLLEPYNKYRFLSNGHVTIPGQQDKDMFQETMEAMRIMGIPEDEQMGLLRVISGVLQLGNIAFKKERNTDQASMPDNTAAQKVSHLLGINVTDFTRGILTPRIKVGRDY…	semi_Cterm	not_terminal	semi_specific	not_terminal	TMT-labelled	nterm	neo_termini	feature-specific	Q8VDD5_n[230]KGTGDCSDEEVD	KGTGDCSDEEVD	PFVVTRRIVR	GKADGADAKA	PFVVTRRIVRKGTGDCSDEEVDGKADGADAKA	TGDCSDEEVDGKADGADAKA	20	32	10	10	10	10	TGDCSDEEVD | GKADGADAKA	EEVD | GKAD
Q8VDD5_n[230]STAAQQELR	3.14068	9.93265	5.90231	0.000393819	0.039413	0.523432	T - L	Frac09	n[230]STAAQQELR	STAAQQELR	Q8VDD5	N-term(229.1629)	Q8VDD5_n[230]STAAQQELR	Myosin-9	1960	1154	1162	R	S	D	SKREQEVSIL	LKTELEDTLD	AQQAADKYLYVDKNFINNPLAQADWAAKKLVWVPSSKNGFEPASLKEEVGEEAIVELVENGKKVKVNKDDIQKMNPPKFSKVEDMAELTCLNEASVLHNLKERYYSGLIYTYSGLFCVVINPYKNLPIYSEEIVEMYKGKKRHEMPPHIYAITDTAYRSMMQDREDQSILCTGESGAGKTENTKKVIQYLAHVASSHKSKKDQGELERQLLQANPILEAFGNAKTVKNDNSSRFGKFIRINFDVNGYIVGANIETYLLEKSRAIRQAKEERTFHIFYYLLSGAGEHLKTDLLLEPYNKYRFLSNGHVTIPGQQDKDMFQETMEAMRIMGIPEDEQMGLLRVISGVLQLGNIAFKKERNTDQASMPDNTAAQKVSHLLGINVTDFTRGILTPRIKVGRDY…	semi_Nterm	not_terminal	semi_specific	not_terminal	TMT-labelled	nterm	neo_termini	feature-specific	Q8VDD5_n[230]STAAQQELR	STAAQQELR	LKTELEDTLD	SKREQEVSIL	LKTELEDTLDSTAAQQELRSKREQEVSIL	LKTELEDTLDSTAAQQELRS	20	29	10	10	10	10	LKTELEDTLD | STAAQQELRS	DTLD | STAA
P20152_n[230]FSLADAINTEFK	2.01353	4.70368	9.45225	1.36071e-05	0.0106408	3.69162	N - L	Frac10	n[230]FSLADAINTEFK	FSLADAINTEFK	P20152	12K(229.1629), N-term(229.1629)	P20152_n[230]FSLADAINTEFK	Vimentin	466	86	97	K	N	D	NTRTNEKVEL	GVRLLQDSVD	STRSVSSSSYRRMFGGSGTSSRPSSNRSYVTTSTRTYSLGSALRPSTSRSLYSSSPGGAYVTRSSAVRLRSSVPGVRLLQDSVD	semi_Nterm	not_terminal	semi_specific	not_terminal	TMT-labelled	nterm	neo_termini	feature-specific	P20152_n[230]FSLADAINTEFK	FSLADAINTEFK	GVRLLQDSVD	NTRTNEKVEL	GVRLLQDSVDFSLADAINTEFKNTRTNEKVEL	GVRLLQDSVDFSLADAINTE	20	32	10	10	10	10	GVRLLQDSVD | FSLADAINTE	DSVD | FSLA
P20152_n[230]VDVSKPDLTAALR	4.15581	8.67753	8.15985	3.96164e-05	0.0206534	2.74979	N - L	Frac10	n[230]VDVSKPDLTAALR	VDVSKPDLTAALR	P20152	5K(229.1629), N-term(229.1629)	P20152_n[230]VDVSKPDLTAALR	Vimentin	466	258	270	R	D	D	DVRQQYESVA	QIQEQHVQID	STRSVSSSSYRRMFGGSGTSSRPSSNRSYVTTSTRTYSLGSALRPSTSRSLYSSSPGGAYVTRSSAVRLRSSVPGVRLLQDSVDFSLADAINTEFKNTRTNEKVELQELNDRFANYIDKVRFLEQQNKILLAELEQLKGQGKSRLGDLYEEEMRELRRQVDQLTNDKARVEVERDNLAEDIMRLREKLQEEMLQREEAESTLQSFRQDVDNASLARLDLERKVESLQEEIAFLKKLHDEEIQELQAQIQEQHVQID	semi_Nterm	not_terminal	semi_specific	not_terminal	TMT-labelled	nterm	neo_termini	feature-specific	P20152_n[230]VDVSKPDLTAALR	VDVSKPDLTAALR	QIQEQHVQID	DVRQQYESVA	QIQEQHVQIDVDVSKPDLTAALRDVRQQYESVA	QIQEQHVQIDVDVSKPDLTA	20	33	10	10	10	10	QIQEQHVQID | VDVSKPDLTA	VQID | VDVS
Q9JKF1_n[230]GLGVVRPHYGSVLDNER	1.71545	7.07223	6.53345	0.000187995	0.0473606	1.27738	N - L	Frac10	n[230]GLGVVRPHYGSVLDNER	GLGVVRPHYGSVLDNER	Q9JKF1	N-term(229.1629)	Q9JKF1_n[230]GLGVVRPHYGSVLDNER	Ras GTPase-activating-like protein IQGAP1	1657	9	25	R	L	D	LTAEEMDERR	MSAAEEVD	SAAEEVD	semi_Nterm	not_terminal	semi_specific	not_terminal	TMT-labelled	nterm	neo_termini	feature-specific	Q9JKF1_n[230]GLGVVRPHYGSVLDNER	GLGVVRPHYGSVLDNER	XXMSAAEEVD	LTAEEMDERR	XXMSAAEEVDGLGVVRPHYGSVLDNERLTAEEMDERR	XXMSAAEEVDGLGVVRPHYG	20	37	10	8	10	10	XXMSAAEEVD | GLGVVRPHYG	EEVD | GLGV
P20152_n[230]VDVSKPDLTAALR	5.08837	9.78388	9.44325	1.44347e-05	0.0248132	3.448	N - L	Frac11	n[230]VDVSKPDLTAALR	VDVSKPDLTAALR	P20152	5K(229.1629), N-term(229.1629)	P20152_n[230]VDVSKPDLTAALR	Vimentin	466	258	270	R	D	D	DVRQQYESVA	QIQEQHVQID	STRSVSSSSYRRMFGGSGTSSRPSSNRSYVTTSTRTYSLGSALRPSTSRSLYSSSPGGAYVTRSSAVRLRSSVPGVRLLQDSVDFSLADAINTEFKNTRTNEKVELQELNDRFANYIDKVRFLEQQNKILLAELEQLKGQGKSRLGDLYEEEMRELRRQVDQLTNDKARVEVERDNLAEDIMRLREKLQEEMLQREEAESTLQSFRQDVDNASLARLDLERKVESLQEEIAFLKKLHDEEIQELQAQIQEQHVQID	semi_Nterm	not_terminal	semi_specific	not_terminal	TMT-labelled	nterm	neo_termini	feature-specific	P20152_n[230]VDVSKPDLTAALR	VDVSKPDLTAALR	QIQEQHVQID	DVRQQYESVA	QIQEQHVQIDVDVSKPDLTAALRDVRQQYESVA	QIQEQHVQIDVDVSKPDLTA	20	33	10	10	10	10	QIQEQHVQID | VDVSKPDLTA	VQID | VDVS
P20152_n[230]VDVSKPDLTAALR	5.24226	9.78388	9.86107	1.05127e-05	0.0139644	4.08537	T - L	Frac11	n[230]VDVSKPDLTAALR	VDVSKPDLTAALR	P20152	5K(229.1629), N-term(229.1629)	P20152_n[230]VDVSKPDLTAALR	Vimentin	466	258	270	R	D	D	DVRQQYESVA	QIQEQHVQID	STRSVSSSSYRRMFGGSGTSSRPSSNRSYVTTSTRTYSLGSALRPSTSRSLYSSSPGGAYVTRSSAVRLRSSVPGVRLLQDSVDFSLADAINTEFKNTRTNEKVELQELNDRFANYIDKVRFLEQQNKILLAELEQLKGQGKSRLGDLYEEEMRELRRQVDQLTNDKARVEVERDNLAEDIMRLREKLQEEMLQREEAESTLQSFRQDVDNASLARLDLERKVESLQEEIAFLKKLHDEEIQELQAQIQEQHVQID	semi_Nterm	not_terminal	semi_specific	not_terminal	TMT-labelled	nterm	neo_termini	feature-specific	P20152_n[230]VDVSKPDLTAALR	VDVSKPDLTAALR	QIQEQHVQID	DVRQQYESVA	QIQEQHVQIDVDVSKPDLTAALRDVRQQYESVA	QIQEQHVQIDVDVSKPDLTA	20	33	10	10	10	10	QIQEQHVQID | VDVSKPDLTA	VQID | VDVS
Q8K124_n[230]SGPPVFAPLSDISEDQPQEPPR	1.98103	8.0102	6.79539	0.00014885	0.0207123	1.40438	T - L	Frac11	n[230]SGPPVFAPLSDISEDQPQEPPR	SGPPVFAPLSDISEDQPQEPPR	Q8K124	N-term(229.1629)	Q8K124_n[230]SGPPVFAPLSDISEDQPQEPPR	Pleckstrin homology domain-containing family O member 2	495	181	202	R	A	D	ALMPPVKPSP	LSRLDLDVPD	EEESIKEGSEKPRGARTADKAGWIKKSSGGLLGLWKDRYLLLCQAQLLVYENEDEQKCVETVELGSYEKCQDLRTLLKRKHHRFILLRSPGNKVSDIKFQAPSGEEKESWIKALNEGINRGKNKAFDEVKVDKTCALEHVTRNRVRGGQRRRPPTRIHLKEVASAASDGLSRLDLDVPD	semi_Nterm	not_terminal	semi_specific	not_terminal	TMT-labelled	nterm	neo_termini	feature-specific	Q8K124_n[230]SGPPVFAPLSDISEDQPQEPPR	SGPPVFAPLSDISEDQPQEPPR	LSRLDLDVPD	ALMPPVKPSP	LSRLDLDVPDSGPPVFAPLSDISEDQPQEPPRALMPPVKPSP	LSRLDLDVPDSGPPVFAPLS	20	42	10	10	10	10	LSRLDLDVPD | SGPPVFAPLS	DVPD | SGPP
Q9Z1A1_n[230]LLDSLEPPGEPGPSTSIPENDTVD	2.74834	10.2403	6.15823	0.000289327	0.0242622	0.700778	T - L	Frac11	n[230]LLDSLEPPGEPGPSTSIPENDTVD	LLDSLEPPGEPGPSTSIPENDTVD	Q9Z1A1	N-term(229.1629)	Q9Z1A1_n[230]LLDSLEPPGEPGPSTSIPENDTVD	TFG protein	397	119	142	D	G	R	GREEKPAASD	LVELRNKVNR	NGQLDLSGKLIIKAQLGEDIRRIPIHNEDITYDELVLMMQRVFRGKLLSNDEVTIKYKDEDGDLITIFDSSDLSFAIQCSRILKLTLFVNGQPRPLESSQVKYLRRELVELRNKVNR	semi_Cterm	not_terminal	semi_specific	not_terminal	TMT-labelled	nterm	neo_termini	feature-specific	Q9Z1A1_n[230]LLDSLEPPGEPGPSTSIPENDTVD	LLDSLEPPGEPGPSTSIPENDTVD	LVELRNKVNR	GREEKPAASD	LVELRNKVNRLLDSLEPPGEPGPSTSIPENDTVDGREEKPAASD	TSIPENDTVDGREEKPAASD	20	44	10	10	10	10	TSIPENDTVD | GREEKPAASD	DTVD | GREE
P20152_n[230]KLHDEEIQELQAQIQEQHVQID	3.338	7.92168	6.15457	0.000290472	0.0242622	0.696654	T - L	Frac11	n[230]KLHDEEIQELQAQIQEQHVQID	KLHDEEIQELQAQIQEQHVQID	P20152	1K(229.1629), N-term(229.1629)	P20152_n[230]KLHDEEIQELQAQIQEQHVQID	Vimentin	466	236	257	D	V	K	VDVSKPDLTA	SLQEEIAFLK	STRSVSSSSYRRMFGGSGTSSRPSSNRSYVTTSTRTYSLGSALRPSTSRSLYSSSPGGAYVTRSSAVRLRSSVPGVRLLQDSVDFSLADAINTEFKNTRTNEKVELQELNDRFANYIDKVRFLEQQNKILLAELEQLKGQGKSRLGDLYEEEMRELRRQVDQLTNDKARVEVERDNLAEDIMRLREKLQEEMLQREEAESTLQSFRQDVDNASLARLDLERKVESLQEEIAFLK	semi_Cterm	not_terminal	semi_specific	not_terminal	TMT-labelled	nterm	neo_termini	feature-specific	P20152_n[230]KLHDEEIQELQAQIQEQHVQID	KLHDEEIQELQAQIQEQHVQID	SLQEEIAFLK	VDVSKPDLTA	SLQEEIAFLKKLHDEEIQELQAQIQEQHVQIDVDVSKPDLTA	QIQEQHVQIDVDVSKPDLTA	20	42	10	10	10	10	QIQEQHVQID | VDVSKPDLTA	VQID | VDVS
P20152_n[230]FSLADAINTEFK	5.45787	5.16047	10.2474	8.46009e-06	0.0215648	3.26681	N - L	Frac12	n[230]FSLADAINTEFK	FSLADAINTEFK	P20152	12K(229.1629), N-term(229.1629)	P20152_n[230]FSLADAINTEFK	Vimentin	466	86	97	K	N	D	NTRTNEKVEL	GVRLLQDSVD	STRSVSSSSYRRMFGGSGTSSRPSSNRSYVTTSTRTYSLGSALRPSTSRSLYSSSPGGAYVTRSSAVRLRSSVPGVRLLQDSVD	semi_Nterm	not_terminal	semi_specific	not_terminal	TMT-labelled	nterm	neo_termini	feature-specific	P20152_n[230]FSLADAINTEFK	FSLADAINTEFK	GVRLLQDSVD	NTRTNEKVEL	GVRLLQDSVDFSLADAINTEFKNTRTNEKVEL	GVRLLQDSVDFSLADAINTE	20	32	10	10	10	10	GVRLLQDSVD | FSLADAINTE	DSVD | FSLA
Q91YI4_n[230]ETDVPVDTNLIEFD	2.52952	12.2109	7.72372	6.42052e-05	0.0409147	1.86506	N - L	Frac12	n[230]ETDVPVDTNLIEFD	ETDVPVDTNLIEFD	Q91YI4	N-term(229.1629)	Q91YI4_n[230]ETDVPVDTNLIEFD	Beta-arrestin-2	410	365	378	D	T	R	TNYATDDDIV	TLPRPQSAPR	GEKPGTRVFKKSSPNCKLTVYLGKRDFVDHLDKVDPVDGVVLVDPDYLKDRKVFVTLTCAFRYGREDLDVLGLSFRKDLFIATYQAFPPMPNPPRPPTRLQDRLLKKLGQHAHPFFFTIPQNLPCSVTLQPGPEDTGKACGVDFEIRAFCAKSIEEKSHKRNSVRLIIRKVQFAPETPGPQPSAETTRHFLMSDRRSLHLEASLDKELYYHGEPLNVNVHVTNNSAKTVKKIRVSVRQYADICLFSTAQYKCPVAQLEQDDQVSPSSTFCKVYTITPLLSDNREKRGLALDGQLKHEDTNLASSTIVKEGANKEVLGILVSYRVKVKLVVSRGGDVSVELPFVLMHPKPHDHITLPRPQSAPR	semi_Cterm	not_terminal	semi_specific	not_terminal	TMT-labelled	nterm	neo_termini	feature-specific	Q91YI4_n[230]ETDVPVDTNLIEFD	ETDVPVDTNLIEFD	TLPRPQSAPR	TNYATDDDIV	TLPRPQSAPRETDVPVDTNLIEFDTNYATDDDIV	PVDTNLIEFDTNYATDDDIV	20	34	10	10	10	10	PVDTNLIEFD | TNYATDDDIV	IEFD | TNYA
P20152_n[230]VSKPDLTAALR	1.30638	7.94194	7.18238	0.000106296	0.0451581	1.53185	N - L	Frac12	n[230]VSKPDLTAALR	VSKPDLTAALR	P20152	3K(229.1629), N-term(229.1629)	P20152_n[230]VSKPDLTAALR	Vimentin	466	260	270	R	D	D	DVRQQYESVA	QEQHVQIDVD	STRSVSSSSYRRMFGGSGTSSRPSSNRSYVTTSTRTYSLGSALRPSTSRSLYSSSPGGAYVTRSSAVRLRSSVPGVRLLQDSVDFSLADAINTEFKNTRTNEKVELQELNDRFANYIDKVRFLEQQNKILLAELEQLKGQGKSRLGDLYEEEMRELRRQVDQLTNDKARVEVERDNLAEDIMRLREKLQEEMLQREEAESTLQSFRQDVDNASLARLDLERKVESLQEEIAFLKKLHDEEIQELQAQIQEQHVQIDVD	semi_Nterm	not_terminal	semi_specific	not_terminal	TMT-labelled	nterm	neo_termini	feature-specific	P20152_n[230]VSKPDLTAALR	VSKPDLTAALR	QEQHVQIDVD	DVRQQYESVA	QEQHVQIDVDVSKPDLTAALRDVRQQYESVA	QEQHVQIDVDVSKPDLTAAL	20	31	10	10	10	10	QEQHVQIDVD | VSKPDLTAAL	IDVD | VSKP
Q8VDD5_n[230]KGTGDCSDEEVD	6.33941	4.13205	14.2262	6.91295e-07	0.0016121	4.38805	N - L	Frac13	n[230]KGTGDCSDEEVD	KGTGDCSDEEVD	Q8VDD5	1K(229.1629), 6C(57.0214), N-term(229.1629)	Q8VDD5_n[230]KGTGDCSDEEVD	Myosin-9	1960	1937	1948	D	G	R	GKADGADAKA	PFVVTRRIVR	AQQAADKYLYVDKNFINNPLAQADWAAKKLVWVPSSKNGFEPASLKEEVGEEAIVELVENGKKVKVNKDDIQKMNPPKFSKVEDMAELTCLNEASVLHNLKERYYSGLIYTYSGLFCVVINPYKNLPIYSEEIVEMYKGKKRHEMPPHIYAITDTAYRSMMQDREDQSILCTGESGAGKTENTKKVIQYLAHVASSHKSKKDQGELERQLLQANPILEAFGNAKTVKNDNSSRFGKFIRINFDVNGYIVGANIETYLLEKSRAIRQAKEERTFHIFYYLLSGAGEHLKTDLLLEPYNKYRFLSNGHVTIPGQQDKDMFQETMEAMRIMGIPEDEQMGLLRVISGVLQLGNIAFKKERNTDQASMPDNTAAQKVSHLLGINVTDFTRGILTPRIKVGRDY…	semi_Cterm	not_terminal	semi_specific	not_terminal	TMT-labelled	nterm	neo_termini	feature-specific	Q8VDD5_n[230]KGTGDCSDEEVD	KGTGDCSDEEVD	PFVVTRRIVR	GKADGADAKA	PFVVTRRIVRKGTGDCSDEEVDGKADGADAKA	TGDCSDEEVDGKADGADAKA	20	32	10	10	10	10	TGDCSDEEVD | GKADGADAKA	EEVD | GKAD
Q9QXS1_n[230]GPSVEAEPEYTFEGLR	4.94724	5.69221	9.14193	1.85806e-05	0.00866599	2.97796	N - L	Frac13	n[230]GPSVEAEPEYTFEGLR	GPSVEAEPEYTFEGLR	Q9QXS1	N-term(229.1629)	Q9QXS1_n[230]GPSVEAEPEYTFEGLR	Plectin	4691	2779	2794	R	Q	D	QKVPAQQLQE	ALPNGRDAPD	VAGMLMPLDRLRAIYEVLFREGVMVAKKDRRPRSLHPHVPGVTNLQVMRAMASLKARGLVRETFAWCHFYWYLTNEGIDHLRQYLHLPPEIVPASLQRVRRPVAMVIPARRRSPHVQTMQGPLGCPPKRGPLPAEDPAREERQVYRRKEREEGAPETPVVSATTVGTLARPGPEPAPATDERDRVQKKTFTKWVNKHLIKHWRAEAQRHISDLYEDLRDGHNLISLLEVLSGDSLPREKGRMRFHKLQNVQIALDYLRHRQVKLVNIRNDDIADGNPKLTLGLIWTIILHFQISDIQVSGQSEDMTAKEKLLLWSQRMVEGYQGLRCDNFTTSWRDGRLFNAIIHRHKPMLIDMNKVYRQTNLENLDQAFSVAERDLGVTRLLDPEDVDVPQPDEKSII…	semi_Nterm	not_terminal	semi_specific	not_terminal	TMT-labelled	nterm	neo_termini	feature-specific	Q9QXS1_n[230]GPSVEAEPEYTFEGLR	GPSVEAEPEYTFEGLR	ALPNGRDAPD	QKVPAQQLQE	ALPNGRDAPDGPSVEAEPEYTFEGLRQKVPAQQLQE	ALPNGRDAPDGPSVEAEPEY	20	36	10	10	10	10	ALPNGRDAPD | GPSVEAEPEY	DAPD | GPSV
P20152_n[230]VSKPDLTAALR	3.33778	8.8462	12.4894	1.84917e-06	0.00215613	2.96198	N - L	Frac13	n[230]VSKPDLTAALR	VSKPDLTAALR	P20152	3K(229.1629), N-term(229.1629)	P20152_n[230]VSKPDLTAALR	Vimentin	466	260	270	R	D	D	DVRQQYESVA	QEQHVQIDVD	STRSVSSSSYRRMFGGSGTSSRPSSNRSYVTTSTRTYSLGSALRPSTSRSLYSSSPGGAYVTRSSAVRLRSSVPGVRLLQDSVDFSLADAINTEFKNTRTNEKVELQELNDRFANYIDKVRFLEQQNKILLAELEQLKGQGKSRLGDLYEEEMRELRRQVDQLTNDKARVEVERDNLAEDIMRLREKLQEEMLQREEAESTLQSFRQDVDNASLARLDLERKVESLQEEIAFLKKLHDEEIQELQAQIQEQHVQIDVD	semi_Nterm	not_terminal	semi_specific	not_terminal	TMT-labelled	nterm	neo_termini	feature-specific	P20152_n[230]VSKPDLTAALR	VSKPDLTAALR	QEQHVQIDVD	DVRQQYESVA	QEQHVQIDVDVSKPDLTAALRDVRQQYESVA	QEQHVQIDVDVSKPDLTAAL	20	31	10	10	10	10	QEQHVQIDVD | VSKPDLTAAL	IDVD | VSKP
Q9WUA3_n[230]SSSSSAYPK	3.36476	8.55952	9.72959	1.18039e-05	0.00688169	2.91839	N - L	Frac13	n[230]SSSSSAYPK	SSSSSAYPK	Q9WUA3	9K(229.1629), N-term(229.1629)	Q9WUA3_n[230]SSSSSAYPK	ATP-dependent 6-phosphofructokinase, platelet type	784	6	14	K	Y	D	YLEHLSGDGK	MSDLD	SDLD	semi_Nterm	not_terminal	semi_specific	not_terminal	TMT-labelled	nterm	neo_termini	feature-specific	Q9WUA3_n[230]SSSSSAYPK	SSSSSAYPK	XXXXXMSDLD	YLEHLSGDGK	XXXXXMSDLDSSSSSAYPKYLEHLSGDGK	XXXXXMSDLDSSSSSAYPKY	20	29	10	5	10	10	XXXXXMSDLD | SSSSSAYPKY	SDLD | SSSS
Q8VDD5_n[230]KGTGDCSDEEVD	5.17534	4.13205	13.5972	9.73996e-07	0.00227136	4.17731	T - L	Frac13	n[230]KGTGDCSDEEVD	KGTGDCSDEEVD	Q8VDD5	1K(229.1629), 6C(57.0214), N-term(229.1629)	Q8VDD5_n[230]KGTGDCSDEEVD	Myosin-9	1960	1937	1948	D	G	R	GKADGADAKA	PFVVTRRIVR	AQQAADKYLYVDKNFINNPLAQADWAAKKLVWVPSSKNGFEPASLKEEVGEEAIVELVENGKKVKVNKDDIQKMNPPKFSKVEDMAELTCLNEASVLHNLKERYYSGLIYTYSGLFCVVINPYKNLPIYSEEIVEMYKGKKRHEMPPHIYAITDTAYRSMMQDREDQSILCTGESGAGKTENTKKVIQYLAHVASSHKSKKDQGELERQLLQANPILEAFGNAKTVKNDNSSRFGKFIRINFDVNGYIVGANIETYLLEKSRAIRQAKEERTFHIFYYLLSGAGEHLKTDLLLEPYNKYRFLSNGHVTIPGQQDKDMFQETMEAMRIMGIPEDEQMGLLRVISGVLQLGNIAFKKERNTDQASMPDNTAAQKVSHLLGINVTDFTRGILTPRIKVGRDY…	semi_Cterm	not_terminal	semi_specific	not_terminal	TMT-labelled	nterm	neo_termini	feature-specific	Q8VDD5_n[230]KGTGDCSDEEVD	KGTGDCSDEEVD	PFVVTRRIVR	GKADGADAKA	PFVVTRRIVRKGTGDCSDEEVDGKADGADAKA	TGDCSDEEVDGKADGADAKA	20	32	10	10	10	10	TGDCSDEEVD | GKADGADAKA	EEVD | GKAD
Q9WUA3_n[230]SSSSSAYPK	3.4976	8.55952	11.6276	3.15982e-06	0.00368435	3.53068	T - L	Frac13	n[230]SSSSSAYPK	SSSSSAYPK	Q9WUA3	9K(229.1629), N-term(229.1629)	Q9WUA3_n[230]SSSSSAYPK	ATP-dependent 6-phosphofructokinase, platelet type	784	6	14	K	Y	D	YLEHLSGDGK	MSDLD	SDLD	semi_Nterm	not_terminal	semi_specific	not_terminal	TMT-labelled	nterm	neo_termini	feature-specific	Q9WUA3_n[230]SSSSSAYPK	SSSSSAYPK	XXXXXMSDLD	YLEHLSGDGK	XXXXXMSDLDSSSSSAYPKYLEHLSGDGK	XXXXXMSDLDSSSSSAYPKY	20	29	10	5	10	10	XXXXXMSDLD | SSSSSAYPKY	SDLD | SSSS
P20152_n[230]VSKPDLTAALR	2.21384	8.8462	10.1413	8.70983e-06	0.00540241	2.4441	T - L	Frac13	n[230]VSKPDLTAALR	VSKPDLTAALR	P20152	3K(229.1629), N-term(229.1629)	P20152_n[230]VSKPDLTAALR	Vimentin	466	260	270	R	D	D	DVRQQYESVA	QEQHVQIDVD	STRSVSSSSYRRMFGGSGTSSRPSSNRSYVTTSTRTYSLGSALRPSTSRSLYSSSPGGAYVTRSSAVRLRSSVPGVRLLQDSVDFSLADAINTEFKNTRTNEKVELQELNDRFANYIDKVRFLEQQNKILLAELEQLKGQGKSRLGDLYEEEMRELRRQVDQLTNDKARVEVERDNLAEDIMRLREKLQEEMLQREEAESTLQSFRQDVDNASLARLDLERKVESLQEEIAFLKKLHDEEIQELQAQIQEQHVQIDVD	semi_Nterm	not_terminal	semi_specific	not_terminal	TMT-labelled	nterm	neo_termini	feature-specific	P20152_n[230]VSKPDLTAALR	VSKPDLTAALR	QEQHVQIDVD	DVRQQYESVA	QEQHVQIDVDVSKPDLTAALRDVRQQYESVA	QEQHVQIDVDVSKPDLTAAL	20	31	10	10	10	10	QEQHVQIDVD | VSKPDLTAAL	IDVD | VSKP
Q9QXS1_n[230]GPSVEAEPEYTFEGLR	4.06641	5.69221	7.51426	7.51535e-05	0.0350516	1.6739	T - L	Frac13	n[230]GPSVEAEPEYTFEGLR	GPSVEAEPEYTFEGLR	Q9QXS1	N-term(229.1629)	Q9QXS1_n[230]GPSVEAEPEYTFEGLR	Plectin	4691	2779	2794	R	Q	D	QKVPAQQLQE	ALPNGRDAPD	VAGMLMPLDRLRAIYEVLFREGVMVAKKDRRPRSLHPHVPGVTNLQVMRAMASLKARGLVRETFAWCHFYWYLTNEGIDHLRQYLHLPPEIVPASLQRVRRPVAMVIPARRRSPHVQTMQGPLGCPPKRGPLPAEDPAREERQVYRRKEREEGAPETPVVSATTVGTLARPGPEPAPATDERDRVQKKTFTKWVNKHLIKHWRAEAQRHISDLYEDLRDGHNLISLLEVLSGDSLPREKGRMRFHKLQNVQIALDYLRHRQVKLVNIRNDDIADGNPKLTLGLIWTIILHFQISDIQVSGQSEDMTAKEKLLLWSQRMVEGYQGLRCDNFTTSWRDGRLFNAIIHRHKPMLIDMNKVYRQTNLENLDQAFSVAERDLGVTRLLDPEDVDVPQPDEKSII…	semi_Nterm	not_terminal	semi_specific	not_terminal	TMT-labelled	nterm	neo_termini	feature-specific	Q9QXS1_n[230]GPSVEAEPEYTFEGLR	GPSVEAEPEYTFEGLR	ALPNGRDAPD	QKVPAQQLQE	ALPNGRDAPDGPSVEAEPEYTFEGLRQKVPAQQLQE	ALPNGRDAPDGPSVEAEPEY	20	36	10	10	10	10	ALPNGRDAPD | GPSVEAEPEY	DAPD | GPSV
Q68FL4_n[230]GTVTEAPR	2.52693	23.7421	8.93182	2.21169e-05	0.0224382	2.7955	N - L	Frac14	n[230]GTVTEAPR	GTVTEAPR	Q68FL4	N-term(229.1629)	Q68FL4_n[230]GTVTEAPR	Putative adenosylhomocysteinase 3	613	112	119	R	T	D	TVKKQIQFAD	DGGEALVSPD	SVQVVSAAAAAKVPEVELKDLSPSEAEPQLGLSAAAVGAMVPPAGGGDPEAPAPAPAAERPPAPGPGSGPTAALSPAAGKVPQASAMKRSDPHHQHQRHRDGGEALVSPD	semi_Nterm	not_terminal	semi_specific	not_terminal	TMT-labelled	nterm	neo_termini	feature-specific	Q68FL4_n[230]GTVTEAPR	GTVTEAPR	DGGEALVSPD	TVKKQIQFAD	DGGEALVSPDGTVTEAPRTVKKQIQFAD	DGGEALVSPDGTVTEAPRTV	20	28	10	10	10	10	DGGEALVSPD | GTVTEAPRTV	VSPD | GTVT
Q9QXS1_n[230]GPSVEAEPEYTFEGLR	5.72635	4.747	8.52721	3.08641e-05	0.0224382	2.46461	N - L	Frac14	n[230]GPSVEAEPEYTFEGLR	GPSVEAEPEYTFEGLR	Q9QXS1	N-term(229.1629)	Q9QXS1_n[230]GPSVEAEPEYTFEGLR	Plectin	4691	2779	2794	R	Q	D	QKVPAQQLQE	ALPNGRDAPD	VAGMLMPLDRLRAIYEVLFREGVMVAKKDRRPRSLHPHVPGVTNLQVMRAMASLKARGLVRETFAWCHFYWYLTNEGIDHLRQYLHLPPEIVPASLQRVRRPVAMVIPARRRSPHVQTMQGPLGCPPKRGPLPAEDPAREERQVYRRKEREEGAPETPVVSATTVGTLARPGPEPAPATDERDRVQKKTFTKWVNKHLIKHWRAEAQRHISDLYEDLRDGHNLISLLEVLSGDSLPREKGRMRFHKLQNVQIALDYLRHRQVKLVNIRNDDIADGNPKLTLGLIWTIILHFQISDIQVSGQSEDMTAKEKLLLWSQRMVEGYQGLRCDNFTTSWRDGRLFNAIIHRHKPMLIDMNKVYRQTNLENLDQAFSVAERDLGVTRLLDPEDVDVPQPDEKSII…	semi_Nterm	not_terminal	semi_specific	not_terminal	TMT-labelled	nterm	neo_termini	feature-specific	Q9QXS1_n[230]GPSVEAEPEYTFEGLR	GPSVEAEPEYTFEGLR	ALPNGRDAPD	QKVPAQQLQE	ALPNGRDAPDGPSVEAEPEYTFEGLRQKVPAQQLQE	ALPNGRDAPDGPSVEAEPEY	20	36	10	10	10	10	ALPNGRDAPD | GPSVEAEPEY	DAPD | GPSV
P20152_n[230]FSLADAINTEFK	4.58346	4.7149	8.16244	4.21582e-05	0.0229867	2.39579	N - L	Frac14	n[230]FSLADAINTEFK	FSLADAINTEFK	P20152	12K(229.1629), N-term(229.1629)	P20152_n[230]FSLADAINTEFK	Vimentin	466	86	97	K	N	D	NTRTNEKVEL	GVRLLQDSVD	STRSVSSSSYRRMFGGSGTSSRPSSNRSYVTTSTRTYSLGSALRPSTSRSLYSSSPGGAYVTRSSAVRLRSSVPGVRLLQDSVD	semi_Nterm	not_terminal	semi_specific	not_terminal	TMT-labelled	nterm	neo_termini	feature-specific	P20152_n[230]FSLADAINTEFK	FSLADAINTEFK	GVRLLQDSVD	NTRTNEKVEL	GVRLLQDSVDFSLADAINTEFKNTRTNEKVEL	GVRLLQDSVDFSLADAINTE	20	32	10	10	10	10	GVRLLQDSVD | FSLADAINTE	DSVD | FSLA
Q9WUA3_n[230]SSSSSAYPK	4.3697	7.39829	13.0269	1.35779e-06	0.00296135	4.10687	T - L	Frac14	n[230]SSSSSAYPK	SSSSSAYPK	Q9WUA3	9K(229.1629), N-term(229.1629)	Q9WUA3_n[230]SSSSSAYPK	ATP-dependent 6-phosphofructokinase, platelet type	784	6	14	K	Y	D	YLEHLSGDGK	MSDLD	SDLD	semi_Nterm	not_terminal	semi_specific	not_terminal	TMT-labelled	nterm	neo_termini	feature-specific	Q9WUA3_n[230]SSSSSAYPK	SSSSSAYPK	XXXXXMSDLD	YLEHLSGDGK	XXXXXMSDLDSSSSSAYPKYLEHLSGDGK	XXXXXMSDLDSSSSSAYPKY	20	29	10	5	10	10	XXXXXMSDLD | SSSSSAYPKY	SDLD | SSSS
P20152_n[230]FSLADAINTEFK	4.45974	4.7149	7.94213	5.11782e-05	0.0356128	2.10751	T - L	Frac14	n[230]FSLADAINTEFK	FSLADAINTEFK	P20152	12K(229.1629), N-term(229.1629)	P20152_n[230]FSLADAINTEFK	Vimentin	466	86	97	K	N	D	NTRTNEKVEL	GVRLLQDSVD	STRSVSSSSYRRMFGGSGTSSRPSSNRSYVTTSTRTYSLGSALRPSTSRSLYSSSPGGAYVTRSSAVRLRSSVPGVRLLQDSVD	semi_Nterm	not_terminal	semi_specific	not_terminal	TMT-labelled	nterm	neo_termini	feature-specific	P20152_n[230]FSLADAINTEFK	FSLADAINTEFK	GVRLLQDSVD	NTRTNEKVEL	GVRLLQDSVDFSLADAINTEFKNTRTNEKVEL	GVRLLQDSVDFSLADAINTE	20	32	10	10	10	10	GVRLLQDSVD | FSLADAINTE	DSVD | FSLA
Q9QXS1_n[230]GPSVEAEPEYTFEGLR	5.03175	4.747	7.88487	5.38612e-05	0.0356128	1.9862	T - L	Frac14	n[230]GPSVEAEPEYTFEGLR	GPSVEAEPEYTFEGLR	Q9QXS1	N-term(229.1629)	Q9QXS1_n[230]GPSVEAEPEYTFEGLR	Plectin	4691	2779	2794	R	Q	D	QKVPAQQLQE	ALPNGRDAPD	VAGMLMPLDRLRAIYEVLFREGVMVAKKDRRPRSLHPHVPGVTNLQVMRAMASLKARGLVRETFAWCHFYWYLTNEGIDHLRQYLHLPPEIVPASLQRVRRPVAMVIPARRRSPHVQTMQGPLGCPPKRGPLPAEDPAREERQVYRRKEREEGAPETPVVSATTVGTLARPGPEPAPATDERDRVQKKTFTKWVNKHLIKHWRAEAQRHISDLYEDLRDGHNLISLLEVLSGDSLPREKGRMRFHKLQNVQIALDYLRHRQVKLVNIRNDDIADGNPKLTLGLIWTIILHFQISDIQVSGQSEDMTAKEKLLLWSQRMVEGYQGLRCDNFTTSWRDGRLFNAIIHRHKPMLIDMNKVYRQTNLENLDQAFSVAERDLGVTRLLDPEDVDVPQPDEKSII…	semi_Nterm	not_terminal	semi_specific	not_terminal	TMT-labelled	nterm	neo_termini	feature-specific	Q9QXS1_n[230]GPSVEAEPEYTFEGLR	GPSVEAEPEYTFEGLR	ALPNGRDAPD	QKVPAQQLQE	ALPNGRDAPDGPSVEAEPEYTFEGLRQKVPAQQLQE	ALPNGRDAPDGPSVEAEPEY	20	36	10	10	10	10	ALPNGRDAPD | GPSVEAEPEY	DAPD | GPSV
Q68FL4_n[230]GTVTEAPR	2.05884	23.7421	7.67177	6.53146e-05	0.0356128	1.92769	T - L	Frac14	n[230]GTVTEAPR	GTVTEAPR	Q68FL4	N-term(229.1629)	Q68FL4_n[230]GTVTEAPR	Putative adenosylhomocysteinase 3	613	112	119	R	T	D	TVKKQIQFAD	DGGEALVSPD	SVQVVSAAAAAKVPEVELKDLSPSEAEPQLGLSAAAVGAMVPPAGGGDPEAPAPAPAAERPPAPGPGSGPTAALSPAAGKVPQASAMKRSDPHHQHQRHRDGGEALVSPD	semi_Nterm	not_terminal	semi_specific	not_terminal	TMT-labelled	nterm	neo_termini	feature-specific	Q68FL4_n[230]GTVTEAPR	GTVTEAPR	DGGEALVSPD	TVKKQIQFAD	DGGEALVSPDGTVTEAPRTVKKQIQFAD	DGGEALVSPDGTVTEAPRTV	20	28	10	10	10	10	DGGEALVSPD | GTVTEAPRTV	VSPD | GTVT
Q6NV83_n[230]GVPLDATEDSK	3.46824	13.9589	10.558	6.92152e-06	0.0161548	3.16984	N - L	Frac15	n[230]GVPLDATEDSK	GVPLDATEDSK	Q6NV83	11K(229.1629), N-term(229.1629)	Q6NV83_n[230]GVPLDATEDSK	U2 snRNP-associated SURP motif-containing protein	1029	738	748	K	K	D	KNEPIFKVAP	PIKSLDDDLD	ADKTPGGSQKASSKNRSSDVHSSGSSDAHMDASGPSDSDMPSRTRPKSPRKHNYRNESSRESLCDSPHQNLSRPLLENKLKAFSIGKMSTAKRTLSKKEQEELKKKEDEKAAAEIYEEFLAAFEGSDGNKVKTFVRGGVVNAAKDEHETDEKRGKIYKPSSRFADQKNPPNQSSNERPPSLLVIETKKPPLKKGEKEKKKSNLELFKEELKQIQEERDERHKTKGRLSRFEPPQSDSDGQRRSMDVPSRRNRSSGVLDDYAPGSHDVGDPSTTNLYLGNINPQMNEEMLCQEFGRFGPLASVKIMWPRTDEERARERNCGFVAFMNRRDAERALKNLNGKMIMSFEMKLGWGKAVPIPPHPIYIPPSMMEHTLPPPPSGLPFNAQPRERLKNPNAPMLP…	semi_Nterm	not_terminal	semi_specific	not_terminal	TMT-labelled	nterm	neo_termini	feature-specific	Q6NV83_n[230]GVPLDATEDSK	GVPLDATEDSK	PIKSLDDDLD	KNEPIFKVAP	PIKSLDDDLDGVPLDATEDSKKNEPIFKVAP	PIKSLDDDLDGVPLDATEDS	20	31	10	10	10	10	PIKSLDDDLD | GVPLDATEDS	DDLD | GVPL
Q6NV83_n[230]GVPLDATEDSK	3.03719	13.9589	10.0354	1.003e-05	0.0117051	3.95941	T - L	Frac15	n[230]GVPLDATEDSK	GVPLDATEDSK	Q6NV83	11K(229.1629), N-term(229.1629)	Q6NV83_n[230]GVPLDATEDSK	U2 snRNP-associated SURP motif-containing protein	1029	738	748	K	K	D	KNEPIFKVAP	PIKSLDDDLD	ADKTPGGSQKASSKNRSSDVHSSGSSDAHMDASGPSDSDMPSRTRPKSPRKHNYRNESSRESLCDSPHQNLSRPLLENKLKAFSIGKMSTAKRTLSKKEQEELKKKEDEKAAAEIYEEFLAAFEGSDGNKVKTFVRGGVVNAAKDEHETDEKRGKIYKPSSRFADQKNPPNQSSNERPPSLLVIETKKPPLKKGEKEKKKSNLELFKEELKQIQEERDERHKTKGRLSRFEPPQSDSDGQRRSMDVPSRRNRSSGVLDDYAPGSHDVGDPSTTNLYLGNINPQMNEEMLCQEFGRFGPLASVKIMWPRTDEERARERNCGFVAFMNRRDAERALKNLNGKMIMSFEMKLGWGKAVPIPPHPIYIPPSMMEHTLPPPPSGLPFNAQPRERLKNPNAPMLP…	semi_Nterm	not_terminal	semi_specific	not_terminal	TMT-labelled	nterm	neo_termini	feature-specific	Q6NV83_n[230]GVPLDATEDSK	GVPLDATEDSK	PIKSLDDDLD	KNEPIFKVAP	PIKSLDDDLDGVPLDATEDSKKNEPIFKVAP	PIKSLDDDLDGVPLDATEDS	20	31	10	10	10	10	PIKSLDDDLD | GVPLDATEDS	DDLD | GVPL
P20152_n[230]FSLADAINTEFK	2.64518	6.50482	9.18496	1.90424e-05	0.0136661	3.22883	T - L	Frac15	n[230]FSLADAINTEFK	FSLADAINTEFK	P20152	12K(229.1629), N-term(229.1629)	P20152_n[230]FSLADAINTEFK	Vimentin	466	86	97	K	N	D	NTRTNEKVEL	GVRLLQDSVD	STRSVSSSSYRRMFGGSGTSSRPSSNRSYVTTSTRTYSLGSALRPSTSRSLYSSSPGGAYVTRSSAVRLRSSVPGVRLLQDSVD	semi_Nterm	not_terminal	semi_specific	not_terminal	TMT-labelled	nterm	neo_termini	feature-specific	P20152_n[230]FSLADAINTEFK	FSLADAINTEFK	GVRLLQDSVD	NTRTNEKVEL	GVRLLQDSVDFSLADAINTEFKNTRTNEKVEL	GVRLLQDSVDFSLADAINTE	20	32	10	10	10	10	GVRLLQDSVD | FSLADAINTE	DSVD | FSLA
P20152_n[230]VSKPDLTAALR	2.93765	9.31946	5.93711	0.000385283	0.0499583	0.581217	T - L	Frac15	n[230]VSKPDLTAALR	VSKPDLTAALR	P20152	3K(229.1629), N-term(229.1629)	P20152_n[230]VSKPDLTAALR	Vimentin	466	260	270	R	D	D	DVRQQYESVA	QEQHVQIDVD	STRSVSSSSYRRMFGGSGTSSRPSSNRSYVTTSTRTYSLGSALRPSTSRSLYSSSPGGAYVTRSSAVRLRSSVPGVRLLQDSVDFSLADAINTEFKNTRTNEKVELQELNDRFANYIDKVRFLEQQNKILLAELEQLKGQGKSRLGDLYEEEMRELRRQVDQLTNDKARVEVERDNLAEDIMRLREKLQEEMLQREEAESTLQSFRQDVDNASLARLDLERKVESLQEEIAFLKKLHDEEIQELQAQIQEQHVQIDVD	semi_Nterm	not_terminal	semi_specific	not_terminal	TMT-labelled	nterm	neo_termini	feature-specific	P20152_n[230]VSKPDLTAALR	VSKPDLTAALR	QEQHVQIDVD	DVRQQYESVA	QEQHVQIDVDVSKPDLTAALRDVRQQYESVA	QEQHVQIDVDVSKPDLTAAL	20	31	10	10	10	10	QEQHVQIDVD | VSKPDLTAAL	IDVD | VSKP
Q8VDD5_n[230]KGTGDCSDEEVD	5.75202	5.13109	10.6483	6.16192e-06	0.00509458	3.20042	N - L	Frac16	n[230]KGTGDCSDEEVD	KGTGDCSDEEVD	Q8VDD5	1K(229.1629), 6C(57.0214), N-term(229.1629)	Q8VDD5_n[230]KGTGDCSDEEVD	Myosin-9	1960	1937	1948	D	G	R	GKADGADAKA	PFVVTRRIVR	AQQAADKYLYVDKNFINNPLAQADWAAKKLVWVPSSKNGFEPASLKEEVGEEAIVELVENGKKVKVNKDDIQKMNPPKFSKVEDMAELTCLNEASVLHNLKERYYSGLIYTYSGLFCVVINPYKNLPIYSEEIVEMYKGKKRHEMPPHIYAITDTAYRSMMQDREDQSILCTGESGAGKTENTKKVIQYLAHVASSHKSKKDQGELERQLLQANPILEAFGNAKTVKNDNSSRFGKFIRINFDVNGYIVGANIETYLLEKSRAIRQAKEERTFHIFYYLLSGAGEHLKTDLLLEPYNKYRFLSNGHVTIPGQQDKDMFQETMEAMRIMGIPEDEQMGLLRVISGVLQLGNIAFKKERNTDQASMPDNTAAQKVSHLLGINVTDFTRGILTPRIKVGRDY…	semi_Cterm	not_terminal	semi_specific	not_terminal	TMT-labelled	nterm	neo_termini	feature-specific	Q8VDD5_n[230]KGTGDCSDEEVD	KGTGDCSDEEVD	PFVVTRRIVR	GKADGADAKA	PFVVTRRIVRKGTGDCSDEEVDGKADGADAKA	TGDCSDEEVDGKADGADAKA	20	32	10	10	10	10	TGDCSDEEVD | GKADGADAKA	EEVD | GKAD
P97864_n[230]SGPINDIDANPR	1.70719	11.8909	9.94545	1.01821e-05	0.00563272	3.15001	N - L	Frac16	n[230]SGPINDIDANPR	SGPINDIDANPR	P97864	N-term(229.1629)	P97864_n[230]SGPINDIDANPR	Caspase-7	303	199	210	R	N	D	NKIPVEADFL	TELDDGIQAD	TDDQDCAAELEKVDSSSEDGVDAKPDRSSIISSILLKKKRNASAGPVRTGRDRVPTYLYRMDFQKMGKCIIINNKNFDKATGMDVRNGTDKDAGALFKCFQNLGFEVTVHNDCSCAKMQDLLRKASEEDHSNSACFACVLLSHGEEDLIYGKDGVTPIKDLTAHFRGDRCKTLLEKPKLFFIQACRGTELDDGIQAD	semi_Nterm	not_terminal	semi_specific	not_terminal	TMT-labelled	nterm	neo_termini	feature-specific	P97864_n[230]SGPINDIDANPR	SGPINDIDANPR	TELDDGIQAD	NKIPVEADFL	TELDDGIQADSGPINDIDANPRNKIPVEADFL	TELDDGIQADSGPINDIDAN	20	32	10	10	10	10	TELDDGIQAD | SGPINDIDAN	IQAD | SGPI
P20152_n[230]VDVSKPDLTAALR	1.90058	10.9688	10.3934	7.36743e-06	0.00509458	3.13711	N - L	Frac16	n[230]VDVSKPDLTAALR	VDVSKPDLTAALR	P20152	5K(229.1629), N-term(229.1629)	P20152_n[230]VDVSKPDLTAALR	Vimentin	466	258	270	R	D	D	DVRQQYESVA	QIQEQHVQID	STRSVSSSSYRRMFGGSGTSSRPSSNRSYVTTSTRTYSLGSALRPSTSRSLYSSSPGGAYVTRSSAVRLRSSVPGVRLLQDSVDFSLADAINTEFKNTRTNEKVELQELNDRFANYIDKVRFLEQQNKILLAELEQLKGQGKSRLGDLYEEEMRELRRQVDQLTNDKARVEVERDNLAEDIMRLREKLQEEMLQREEAESTLQSFRQDVDNASLARLDLERKVESLQEEIAFLKKLHDEEIQELQAQIQEQHVQID	semi_Nterm	not_terminal	semi_specific	not_terminal	TMT-labelled	nterm	neo_termini	feature-specific	P20152_n[230]VDVSKPDLTAALR	VDVSKPDLTAALR	QIQEQHVQID	DVRQQYESVA	QIQEQHVQIDVDVSKPDLTAALRDVRQQYESVA	QIQEQHVQIDVDVSKPDLTA	20	33	10	10	10	10	QIQEQHVQID | VDVSKPDLTA	VQID | VDVS
P68254_n[230]DNLTLWTSDSAGEECD	4.35548	9.3045	7.91783	5.25577e-05	0.0181718	2.17585	N - L	Frac16	n[230]DNLTLWTSDSAGEECD	DNLTLWTSDSAGEECD	P68254	15C(57.0214), N-term(229.1629)	P68254_n[230]DNLTLWTSDSAGEECD	14-3-3 protein theta	245	223	238	D	A	R	AAEGAEN	DSTLIMQLLR	EKTELIQKAKLAEQAERYDDMATCMKAVTEQGAELSNEERNLLSVAYKNVVGGRRSAWRVISSIEQKTDTSDKKLQLIKDYREKVESELRSICTTVLELLDKYLIANATNPESKVFYLKMKGDYFRYLAEVACGDDRKQTIENSQGAYQEAFDISKKEMQPTHPIRLGLALNFSVFYYEILNNPELACTLAKTAFDEAIAELDTLNEDSYKDSTLIMQLLR	semi_Cterm	not_terminal	semi_specific	not_terminal	TMT-labelled	nterm	neo_termini	feature-specific	P68254_n[230]DNLTLWTSDSAGEECD	DNLTLWTSDSAGEECD	DSTLIMQLLR	AAEGAENXXX	DSTLIMQLLRDNLTLWTSDSAGEECDAAEGAENXXX	TSDSAGEECDAAEGAENXXX	20	36	7	10	10	10	TSDSAGEECD | AAEGAENXXX	EECD | AAEG
E9Q616_n[230]VNIEGPDAK	4.35678	11.0806	8.01346	4.82831e-05	0.0181718	2.17349	N - L	Frac16	n[230]VNIEGPDAK	VNIEGPDAK	E9Q616	9K(229.1629), N-term(229.1629)	E9Q616_n[230]VNIEGPDAK	AHNAK nucleoprotein (desmoyokin)	5656	1294	1302	K	L	D	LKGPKFKMPE	GPKVDIDVPD	EKEEETTRELLLPNWQGSGSHGLTIAQRDDGVFVQEVMQNSPAARTGVVKEGDQIVGATIYFDNLQSGEVTQLLNTMGHHTVGLKLHRKGDRSPEPGQTWTHEVFSSRSSEVVLSGDDEDYQRIYTTKIKPRLRSEDGVEGDLGETQSRTITVTRRVTAYTVDVTGREGVKDIDITSPEFMIKIPRHEVTEISNTDVETQPGKTVIRLPSGSGPASPTTGSAVDIRAGAISASGPELEGAGHSKFQVTVPGAKVGSLDVNVKAKGLDLGGKGGIRVPGVDVSSSLGAGSVEVQAPSLQSGDIGKIKIPTMKVPKFGVSAGLDGQIPEVGLSVSAPESSVGHKGDKPGLAIGGNIQAPHLEVNPSSVNIEGLEGKLKGPQITGPSLEGDLGLKGTKLQGN…	semi_Nterm	not_terminal	semi_specific	not_terminal	TMT-labelled	nterm	neo_termini	feature-specific	E9Q616_n[230]VNIEGPDAK	VNIEGPDAK	GPKVDIDVPD	LKGPKFKMPE	GPKVDIDVPDVNIEGPDAKLKGPKFKMPE	GPKVDIDVPDVNIEGPDAKL	20	29	10	10	10	10	GPKVDIDVPD | VNIEGPDAKL	DVPD | VNIE
P97864_n[230]SGPINDIDANPR	3.14411	11.8909	18.9254	7.94896e-08	0.000219868	7.04866	T - L	Frac16	n[230]SGPINDIDANPR	SGPINDIDANPR	P97864	N-term(229.1629)	P97864_n[230]SGPINDIDANPR	Caspase-7	303	199	210	R	N	D	NKIPVEADFL	TELDDGIQAD	TDDQDCAAELEKVDSSSEDGVDAKPDRSSIISSILLKKKRNASAGPVRTGRDRVPTYLYRMDFQKMGKCIIINNKNFDKATGMDVRNGTDKDAGALFKCFQNLGFEVTVHNDCSCAKMQDLLRKASEEDHSNSACFACVLLSHGEEDLIYGKDGVTPIKDLTAHFRGDRCKTLLEKPKLFFIQACRGTELDDGIQAD	semi_Nterm	not_terminal	semi_specific	not_terminal	TMT-labelled	nterm	neo_termini	feature-specific	P97864_n[230]SGPINDIDANPR	SGPINDIDANPR	TELDDGIQAD	NKIPVEADFL	TELDDGIQADSGPINDIDANPRNKIPVEADFL	TELDDGIQADSGPINDIDAN	20	32	10	10	10	10	TELDDGIQAD | SGPINDIDAN	IQAD | SGPI
Q8VDD5_n[230]KGTGDCSDEEVD	5.75898	5.13109	11.8614	2.76454e-06	0.00191168	4.83937	T - L	Frac16	n[230]KGTGDCSDEEVD	KGTGDCSDEEVD	Q8VDD5	1K(229.1629), 6C(57.0214), N-term(229.1629)	Q8VDD5_n[230]KGTGDCSDEEVD	Myosin-9	1960	1937	1948	D	G	R	GKADGADAKA	PFVVTRRIVR	AQQAADKYLYVDKNFINNPLAQADWAAKKLVWVPSSKNGFEPASLKEEVGEEAIVELVENGKKVKVNKDDIQKMNPPKFSKVEDMAELTCLNEASVLHNLKERYYSGLIYTYSGLFCVVINPYKNLPIYSEEIVEMYKGKKRHEMPPHIYAITDTAYRSMMQDREDQSILCTGESGAGKTENTKKVIQYLAHVASSHKSKKDQGELERQLLQANPILEAFGNAKTVKNDNSSRFGKFIRINFDVNGYIVGANIETYLLEKSRAIRQAKEERTFHIFYYLLSGAGEHLKTDLLLEPYNKYRFLSNGHVTIPGQQDKDMFQETMEAMRIMGIPEDEQMGLLRVISGVLQLGNIAFKKERNTDQASMPDNTAAQKVSHLLGINVTDFTRGILTPRIKVGRDY…	semi_Cterm	not_terminal	semi_specific	not_terminal	TMT-labelled	nterm	neo_termini	feature-specific	Q8VDD5_n[230]KGTGDCSDEEVD	KGTGDCSDEEVD	PFVVTRRIVR	GKADGADAKA	PFVVTRRIVRKGTGDCSDEEVDGKADGADAKA	TGDCSDEEVDGKADGADAKA	20	32	10	10	10	10	TGDCSDEEVD | GKADGADAKA	EEVD | GKAD
E9Q616_n[230]VNIEGPDAK	5.15856	11.0806	9.01311	2.08345e-05	0.00960468	3.21523	T - L	Frac16	n[230]VNIEGPDAK	VNIEGPDAK	E9Q616	9K(229.1629), N-term(229.1629)	E9Q616_n[230]VNIEGPDAK	AHNAK nucleoprotein (desmoyokin)	5656	1294	1302	K	L	D	LKGPKFKMPE	GPKVDIDVPD	EKEEETTRELLLPNWQGSGSHGLTIAQRDDGVFVQEVMQNSPAARTGVVKEGDQIVGATIYFDNLQSGEVTQLLNTMGHHTVGLKLHRKGDRSPEPGQTWTHEVFSSRSSEVVLSGDDEDYQRIYTTKIKPRLRSEDGVEGDLGETQSRTITVTRRVTAYTVDVTGREGVKDIDITSPEFMIKIPRHEVTEISNTDVETQPGKTVIRLPSGSGPASPTTGSAVDIRAGAISASGPELEGAGHSKFQVTVPGAKVGSLDVNVKAKGLDLGGKGGIRVPGVDVSSSLGAGSVEVQAPSLQSGDIGKIKIPTMKVPKFGVSAGLDGQIPEVGLSVSAPESSVGHKGDKPGLAIGGNIQAPHLEVNPSSVNIEGLEGKLKGPQITGPSLEGDLGLKGTKLQGN…	semi_Nterm	not_terminal	semi_specific	not_terminal	TMT-labelled	nterm	neo_termini	feature-specific	E9Q616_n[230]VNIEGPDAK	VNIEGPDAK	GPKVDIDVPD	LKGPKFKMPE	GPKVDIDVPDVNIEGPDAKLKGPKFKMPE	GPKVDIDVPDVNIEGPDAKL	20	29	10	10	10	10	GPKVDIDVPD | VNIEGPDAKL	DVPD | VNIE
P62259_n[230]DNLTLWTSDMQGD	1.68328	5.88222	7.98079	4.96983e-05	0.0171832	2.36885	T - L	Frac16	n[230]DNLTLWTSDMQGD	DNLTLWTSDMQGD	P62259	N-term(229.1629)	P62259_n[230]DNLTLWTSDMQGD	14-3-3 protein epsilon	255	226	238	D	G	R	GEEQNKEALQ	DSTLIMQLLR	DDREDLVYQAKLAEQAERYDEMVESMKKVAGMDVELTVEERNLLSVAYKNVIGARRASWRIISSIEQKEENKGGEDKLKMIREYRQMVETELKLICCDILDVLDKHLIPAANTGESKVFYYKMKGDYHRYLAEFATGNDRKEAAENSLVAYKAASDIAMTELPPTHPIRLGLALNFSVFYYEILNSPDRACRLAKAAFDDAIAELDTLSEESYKDSTLIMQLLR	semi_Cterm	not_terminal	semi_specific	not_terminal	TMT-labelled	nterm	neo_termini	feature-specific	P62259_n[230]DNLTLWTSDMQGD	DNLTLWTSDMQGD	DSTLIMQLLR	GEEQNKEALQ	DSTLIMQLLRDNLTLWTSDMQGDGEEQNKEALQ	TLWTSDMQGDGEEQNKEALQ	20	33	10	10	10	10	TLWTSDMQGD | GEEQNKEALQ	MQGD | GEEQ
P68254_n[230]DNLTLWTSDSAGEECD	4.27503	9.3045	7.77158	5.99334e-05	0.0184195	2.35479	T - L	Frac16	n[230]DNLTLWTSDSAGEECD	DNLTLWTSDSAGEECD	P68254	15C(57.0214), N-term(229.1629)	P68254_n[230]DNLTLWTSDSAGEECD	14-3-3 protein theta	245	223	238	D	A	R	AAEGAEN	DSTLIMQLLR	EKTELIQKAKLAEQAERYDDMATCMKAVTEQGAELSNEERNLLSVAYKNVVGGRRSAWRVISSIEQKTDTSDKKLQLIKDYREKVESELRSICTTVLELLDKYLIANATNPESKVFYLKMKGDYFRYLAEVACGDDRKQTIENSQGAYQEAFDISKKEMQPTHPIRLGLALNFSVFYYEILNNPELACTLAKTAFDEAIAELDTLNEDSYKDSTLIMQLLR	semi_Cterm	not_terminal	semi_specific	not_terminal	TMT-labelled	nterm	neo_termini	feature-specific	P68254_n[230]DNLTLWTSDSAGEECD	DNLTLWTSDSAGEECD	DSTLIMQLLR	AAEGAENXXX	DSTLIMQLLRDNLTLWTSDSAGEECDAAEGAENXXX	TSDSAGEECDAAEGAENXXX	20	36	7	10	10	10	TSDSAGEECD | AAEGAENXXX	EECD | AAEG
P20152_n[230]VDVSKPDLTAALR	1.32123	10.9688	7.22517	9.96641e-05	0.0275671	1.82014	T - L	Frac16	n[230]VDVSKPDLTAALR	VDVSKPDLTAALR	P20152	5K(229.1629), N-term(229.1629)	P20152_n[230]VDVSKPDLTAALR	Vimentin	466	258	270	R	D	D	DVRQQYESVA	QIQEQHVQID	STRSVSSSSYRRMFGGSGTSSRPSSNRSYVTTSTRTYSLGSALRPSTSRSLYSSSPGGAYVTRSSAVRLRSSVPGVRLLQDSVDFSLADAINTEFKNTRTNEKVELQELNDRFANYIDKVRFLEQQNKILLAELEQLKGQGKSRLGDLYEEEMRELRRQVDQLTNDKARVEVERDNLAEDIMRLREKLQEEMLQREEAESTLQSFRQDVDNASLARLDLERKVESLQEEIAFLKKLHDEEIQELQAQIQEQHVQID	semi_Nterm	not_terminal	semi_specific	not_terminal	TMT-labelled	nterm	neo_termini	feature-specific	P20152_n[230]VDVSKPDLTAALR	VDVSKPDLTAALR	QIQEQHVQID	DVRQQYESVA	QIQEQHVQIDVDVSKPDLTAALRDVRQQYESVA	QIQEQHVQIDVDVSKPDLTA	20	33	10	10	10	10	QIQEQHVQID | VDVSKPDLTA	VQID | VDVS
P97864_n[230]SGPINDIDANPR	3.34397	10.7356	15.3689	3.76301e-07	0.000395492	5.62307	N - L	Frac17	n[230]SGPINDIDANPR	SGPINDIDANPR	P97864	N-term(229.1629)	P97864_n[230]SGPINDIDANPR	Caspase-7	303	199	210	R	N	D	NKIPVEADFL	TELDDGIQAD	TDDQDCAAELEKVDSSSEDGVDAKPDRSSIISSILLKKKRNASAGPVRTGRDRVPTYLYRMDFQKMGKCIIINNKNFDKATGMDVRNGTDKDAGALFKCFQNLGFEVTVHNDCSCAKMQDLLRKASEEDHSNSACFACVLLSHGEEDLIYGKDGVTPIKDLTAHFRGDRCKTLLEKPKLFFIQACRGTELDDGIQAD	semi_Nterm	not_terminal	semi_specific	not_terminal	TMT-labelled	nterm	neo_termini	feature-specific	P97864_n[230]SGPINDIDANPR	SGPINDIDANPR	TELDDGIQAD	NKIPVEADFL	TELDDGIQADSGPINDIDANPRNKIPVEADFL	TELDDGIQADSGPINDIDAN	20	32	10	10	10	10	TELDDGIQAD | SGPINDIDAN	IQAD | SGPI
P26350_n[230]TSSEITTK	4.29561	11.0168	9.16066	1.80724e-05	0.0126627	3.30974	N - L	Frac17	n[230]TSSEITTK	TSSEITTK	P26350	8K(229.1629), N-term(229.1629)	P26350_n[230]TSSEITTK	Prothymosin alpha	111	8	15	K	D	D	DLKEKKEVVE	MSDAAVD	SDAAVD	semi_Nterm	not_terminal	semi_specific	not_terminal	TMT-labelled	nterm	neo_termini	feature-specific	P26350_n[230]TSSEITTK	TSSEITTK	XXXMSDAAVD	DLKEKKEVVE	XXXMSDAAVDTSSEITTKDLKEKKEVVE	XXXMSDAAVDTSSEITTKDL	20	28	10	7	10	10	XXXMSDAAVD | TSSEITTKDL	AAVD | TSSE
P20152_n[230]VDVSKPDLTAALR	2.91809	9.75245	7.54815	7.20694e-05	0.030298	2.12884	N - L	Frac17	n[230]VDVSKPDLTAALR	VDVSKPDLTAALR	P20152	5K(229.1629), N-term(229.1629)	P20152_n[230]VDVSKPDLTAALR	Vimentin	466	258	270	R	D	D	DVRQQYESVA	QIQEQHVQID	STRSVSSSSYRRMFGGSGTSSRPSSNRSYVTTSTRTYSLGSALRPSTSRSLYSSSPGGAYVTRSSAVRLRSSVPGVRLLQDSVDFSLADAINTEFKNTRTNEKVELQELNDRFANYIDKVRFLEQQNKILLAELEQLKGQGKSRLGDLYEEEMRELRRQVDQLTNDKARVEVERDNLAEDIMRLREKLQEEMLQREEAESTLQSFRQDVDNASLARLDLERKVESLQEEIAFLKKLHDEEIQELQAQIQEQHVQID	semi_Nterm	not_terminal	semi_specific	not_terminal	TMT-labelled	nterm	neo_termini	feature-specific	P20152_n[230]VDVSKPDLTAALR	VDVSKPDLTAALR	QIQEQHVQID	DVRQQYESVA	QIQEQHVQIDVDVSKPDLTAALRDVRQQYESVA	QIQEQHVQIDVDVSKPDLTA	20	33	10	10	10	10	QIQEQHVQID | VDVSKPDLTA	VQID | VDVS
Q3TIV5_n[230]YIQGTGGDEVD	1.38918	14.3457	7.18771	0.000101375	0.035515	1.77385	N - L	Frac17	n[230]YIQGTGGDEVD	YIQGTGGDEVD	Q3TIV5	N-term(229.1629)	Q3TIV5_n[230]YIQGTGGDEVD	Zinc finger CCCH domain-containing protein 15	426	314	324	D	D	R	DSMGVNDIDI	DDDEEADDTR	PPKKQAQAGGSKKAEQKKKEKIIEDKTFGLKNKKGAKQQKFIKAVTHQVKFGQQNPRQVAQSEAEKKLKKDDKKKELQELNELFKPVVAAQKISKGADPKSVVCAFFKQGQCTKGDKCKFSHDLTLERKCEKRSVYIDARDEELEKDTMDNWDEKKLEEVVNKKHGEAEKKKPKTQIVCRHFLEAIENNKYGWFWVCPGGGDNCMYRHALPPGFVLKKDKKKEEKEDEISLEDLIERERSALGPNVTKITLESFLAWKKRKRQEKIDKLEQDMERRKADFKAGKALVISGREVFEFRPELVNDDDEEADDTR	semi_Cterm	not_terminal	semi_specific	not_terminal	TMT-labelled	nterm	neo_termini	feature-specific	Q3TIV5_n[230]YIQGTGGDEVD	YIQGTGGDEVD	DDDEEADDTR	DSMGVNDIDI	DDDEEADDTRYIQGTGGDEVDDSMGVNDIDI	IQGTGGDEVDDSMGVNDIDI	20	31	10	10	10	10	IQGTGGDEVD | DSMGVNDIDI	DEVD | DSMG
P97864_n[230]SGPINDIDANPR	3.80778	10.7356	19.6629	5.65726e-08	0.000118916	7.68124	T - L	Frac17	n[230]SGPINDIDANPR	SGPINDIDANPR	P97864	N-term(229.1629)	P97864_n[230]SGPINDIDANPR	Caspase-7	303	199	210	R	N	D	NKIPVEADFL	TELDDGIQAD	TDDQDCAAELEKVDSSSEDGVDAKPDRSSIISSILLKKKRNASAGPVRTGRDRVPTYLYRMDFQKMGKCIIINNKNFDKATGMDVRNGTDKDAGALFKCFQNLGFEVTVHNDCSCAKMQDLLRKASEEDHSNSACFACVLLSHGEEDLIYGKDGVTPIKDLTAHFRGDRCKTLLEKPKLFFIQACRGTELDDGIQAD	semi_Nterm	not_terminal	semi_specific	not_terminal	TMT-labelled	nterm	neo_termini	feature-specific	P97864_n[230]SGPINDIDANPR	SGPINDIDANPR	TELDDGIQAD	NKIPVEADFL	TELDDGIQADSGPINDIDANPRNKIPVEADFL	TELDDGIQADSGPINDIDAN	20	32	10	10	10	10	TELDDGIQAD | SGPINDIDAN	IQAD | SGPI
P61982_n[230]DNLTLWTSDQQD	1.31664	10.8218	8.7535	2.51152e-05	0.0141213	3.1823	T - L	Frac17	n[230]DNLTLWTSDQQD	DNLTLWTSDQQD	P61982	N-term(229.1629)	P61982_n[230]DNLTLWTSDQQD	14-3-3 protein gamma	247	228	239	D	D	R	DDGGEGNN	DSTLIMQLLR	VDREQLVQKARLAEQAERYDDMAAAMKNVTELNEPLSNEERNLLSVAYKNVVGARRSSWRVISSIEQKTSADGNEKKIEMVRAYREKIEKELEAVCQDVLSLLDNYLIKNCSETQYESKVFYLKMKGDYYRYLAEVATGEKRATVVESSEKAYSEAHEISKEHMQPTHPIRLGLALNYSVFYYEIQNAPEQACHLAKTAFDDAIAELDTLNEDSYKDSTLIMQLLR	semi_Cterm	not_terminal	semi_specific	not_terminal	TMT-labelled	nterm	neo_termini	feature-specific	P61982_n[230]DNLTLWTSDQQD	DNLTLWTSDQQD	DSTLIMQLLR	DDGGEGNNXX	DSTLIMQLLRDNLTLWTSDQQDDDGGEGNNXX	LTLWTSDQQDDDGGEGNNXX	20	32	8	10	10	10	LTLWTSDQQD | DDGGEGNNXX	DQQD | DDGG
P26350_n[230]TSSEITTK	3.12624	11.0168	6.8544	0.000140638	0.0334994	1.56053	T - L	Frac17	n[230]TSSEITTK	TSSEITTK	P26350	8K(229.1629), N-term(229.1629)	P26350_n[230]TSSEITTK	Prothymosin alpha	111	8	15	K	D	D	DLKEKKEVVE	MSDAAVD	SDAAVD	semi_Nterm	not_terminal	semi_specific	not_terminal	TMT-labelled	nterm	neo_termini	feature-specific	P26350_n[230]TSSEITTK	TSSEITTK	XXXMSDAAVD	DLKEKKEVVE	XXXMSDAAVDTSSEITTKDLKEKKEVVE	XXXMSDAAVDTSSEITTKDL	20	28	10	7	10	10	XXXMSDAAVD | TSSEITTKDL	AAVD | TSSE
Q9WUK2_n[230]GFCYVEFDEVD	0.99914	4.31443	6.57755	0.00018628	0.0346236	1.28884	T - L	Frac17	n[230]GFCYVEFDEVD	GFCYVEFDEVD	Q9WUK2	3C(57.0214), N-term(229.1629)	Q9WUK2_n[230]GFCYVEFDEVD	Eukaryotic translation initiation factor 4H	248	83	93	D	S	K	SLKEALTYDG	VRDKDTDKFK	ADFDTYDDRAYSSFGGGRGSRGSAGGHGSRSQKELPTEPPYTAYVGNLPFNTVQGDIDAIFKDLSIRSVRLVRDKDTDKFK	semi_Cterm	not_terminal	semi_specific	not_terminal	TMT-labelled	nterm	neo_termini	feature-specific	Q9WUK2_n[230]GFCYVEFDEVD	GFCYVEFDEVD	VRDKDTDKFK	SLKEALTYDG	VRDKDTDKFKGFCYVEFDEVDSLKEALTYDG	FCYVEFDEVDSLKEALTYDG	20	31	10	10	10	10	FCYVEFDEVD | SLKEALTYDG	DEVD | SLKE
E9Q616_n[230]VNIEGPDTK	2.84507	8.84327	8.54418	3.03905e-05	0.0193486	3.0484	T - L	Frac18	n[230]VNIEGPDTK	VNIEGPDTK	E9Q616	9K(229.1629), N-term(229.1629)	E9Q616_n[230]VNIEGPDTK	AHNAK nucleoprotein (desmoyokin)	5656	1546	1554	K	L	D	LKGPKFKMPE	GPKVDIDVPD	EKEEETTRELLLPNWQGSGSHGLTIAQRDDGVFVQEVMQNSPAARTGVVKEGDQIVGATIYFDNLQSGEVTQLLNTMGHHTVGLKLHRKGDRSPEPGQTWTHEVFSSRSSEVVLSGDDEDYQRIYTTKIKPRLRSEDGVEGDLGETQSRTITVTRRVTAYTVDVTGREGVKDIDITSPEFMIKIPRHEVTEISNTDVETQPGKTVIRLPSGSGPASPTTGSAVDIRAGAISASGPELEGAGHSKFQVTVPGAKVGSLDVNVKAKGLDLGGKGGIRVPGVDVSSSLGAGSVEVQAPSLQSGDIGKIKIPTMKVPKFGVSAGLDGQIPEVGLSVSAPESSVGHKGDKPGLAIGGNIQAPHLEVNPSSVNIEGLEGKLKGPQITGPSLEGDLGLKGTKLQGN…	semi_Nterm	not_terminal	semi_specific	not_terminal	TMT-labelled	nterm	neo_termini	feature-specific	E9Q616_n[230]VNIEGPDTK	VNIEGPDTK	GPKVDIDVPD	LKGPKFKMPE	GPKVDIDVPDVNIEGPDTKLKGPKFKMPE	GPKVDIDVPDVNIEGPDTKL	20	29	10	10	10	10	GPKVDIDVPD | VNIEGPDTKL	DVPD | VNIE
P62259_n[230]DNLTLWTSDMQGD	1.89761	5.74539	7.01442	0.000121591	0.0261881	1.69009	T - L	Frac18	n[230]DNLTLWTSDMQGD	DNLTLWTSDMQGD	P62259	N-term(229.1629)	P62259_n[230]DNLTLWTSDMQGD	14-3-3 protein epsilon	255	226	238	D	G	R	GEEQNKEALQ	DSTLIMQLLR	DDREDLVYQAKLAEQAERYDEMVESMKKVAGMDVELTVEERNLLSVAYKNVIGARRASWRIISSIEQKEENKGGEDKLKMIREYRQMVETELKLICCDILDVLDKHLIPAANTGESKVFYYKMKGDYHRYLAEFATGNDRKEAAENSLVAYKAASDIAMTELPPTHPIRLGLALNFSVFYYEILNSPDRACRLAKAAFDDAIAELDTLSEESYKDSTLIMQLLR	semi_Cterm	not_terminal	semi_specific	not_terminal	TMT-labelled	nterm	neo_termini	feature-specific	P62259_n[230]DNLTLWTSDMQGD	DNLTLWTSDMQGD	DSTLIMQLLR	GEEQNKEALQ	DSTLIMQLLRDNLTLWTSDMQGDGEEQNKEALQ	TLWTSDMQGDGEEQNKEALQ	20	33	10	10	10	10	TLWTSDMQGD | GEEQNKEALQ	MQGD | GEEQ
Q8CIN4_n[230]SVIDPIPAPVGDSNVD	2.30607	10.3481	6.35597	0.000237463	0.0261881	0.997669	T - L	Frac18	n[230]SVIDPIPAPVGDSNVD	SVIDPIPAPVGDSNVD	Q8CIN4	N-term(229.1629)	Q8CIN4_n[230]SVIDPIPAPVGDSNVD	Serine/threonine-protein kinase PAK 2	524	197	212	D	S	R	SGAKSSDKQK	PDHTKSIYTR	SDNGELEDKPPAPPVRMSSTIFSTGGKDPLSANHSLKPLPSVPEEKKPRNKIISIFSGTEKGSKKKEKERPEISPPSDFEHTIHVGFDAVTGEFTGMPEQWARLLQTSNITKLEQKKNPQAVLDVLKFYDSNTVKQKYLSFTPPEKDGFPSGTPALNTKGSETSAVVTEEDDDDEDAAPPVIAPRPDHTKSIYTR	semi_Cterm	not_terminal	semi_specific	not_terminal	TMT-labelled	nterm	neo_termini	feature-specific	Q8CIN4_n[230]SVIDPIPAPVGDSNVD	SVIDPIPAPVGDSNVD	PDHTKSIYTR	SGAKSSDKQK	PDHTKSIYTRSVIDPIPAPVGDSNVDSGAKSSDKQK	PAPVGDSNVDSGAKSSDKQK	20	36	10	10	10	10	PAPVGDSNVD | SGAKSSDKQK	SNVD | SGAK
P60710_n[230]SYVGDEAQSK	2.05901	3.72058	6.25096	0.000265429	0.0261881	0.879028	T - L	Frac18	n[230]SYVGDEAQSK	SYVGDEAQSK	P60710	10K(229.1629), N-term(229.1629)	P60710_n[230]SYVGDEAQSK	Actin, cytoplasmic 1	375	52	61	K	R	D	RGILTLKYPI	GVMVGMGQKD	DDDIAALVVDNGSGMCKAGFAGDDAPRAVFPSIVGRPRHQGVMVGMGQKD	semi_Nterm	not_terminal	semi_specific	not_terminal	TMT-labelled	nterm	neo_termini	feature-specific	P60710_n[230]SYVGDEAQSK	SYVGDEAQSK	GVMVGMGQKD	RGILTLKYPI	GVMVGMGQKDSYVGDEAQSKRGILTLKYPI	GVMVGMGQKDSYVGDEAQSK	20	30	10	10	10	10	GVMVGMGQKD | SYVGDEAQSK	GQKD | SYVG
Q9CQV8_n[230]DNLTLWTSENQGDEGD	2.57138	10.5168	10.8699	5.66694e-06	0.00516825	2.81322	N - L	Frac19	n[230]DNLTLWTSENQGDEGD	DNLTLWTSENQGDEGD	Q9CQV8	N-term(229.1629)	Q9CQV8_n[230]DNLTLWTSENQGDEGD	14-3-3 protein beta/alpha	246	225	240	D	A	R	AGEGEN	DSTLIMQLLR	TMDKSELVQKAKLAEQAERYDDMAAAMKAVTEQGHELSNEERNLLSVAYKNVVGARRSSWRVISSIEQKTERNEKKQQMGKEYREKIEAELQDICNDVLELLDKYLILNATQAESKVFYLKMKGDYFRYLSEVASGENKQTTVSNSQQAYQEAFEISKKEMQPTHPIRLGLALNFSVFYYEILNSPEKACSLAKTAFDEAIAELDTLNEESYKDSTLIMQLLR	semi_Cterm	not_terminal	semi_specific	not_terminal	TMT-labelled	nterm	neo_termini	feature-specific	Q9CQV8_n[230]DNLTLWTSENQGDEGD	DNLTLWTSENQGDEGD	DSTLIMQLLR	AGEGENXXXX	DSTLIMQLLRDNLTLWTSENQGDEGDAGEGENXXXX	TSENQGDEGDAGEGENXXXX	20	36	6	10	10	10	TSENQGDEGD | AGEGENXXXX	DEGD | AGEG
Q61599_n[230]AQPQLEEADDDLDSK	3.75422	7.74638	7.89323	5.64538e-05	0.023845	2.05585	N - L	Frac19	n[230]AQPQLEEADDDLDSK	AQPQLEEADDDLDSK	Q61599	15K(229.1629), N-term(229.1629)	Q61599_n[230]AQPQLEEADDDLDSK	Rho GDP-dissociation inhibitor 2	200	6	20	K	L	D	LNYKPPPQKS	MTEKD	TEKD	semi_Nterm	not_terminal	semi_specific	not_terminal	TMT-labelled	nterm	neo_termini	feature-specific	Q61599_n[230]AQPQLEEADDDLDSK	AQPQLEEADDDLDSK	XXXXXMTEKD	LNYKPPPQKS	XXXXXMTEKDAQPQLEEADDDLDSKLNYKPPPQKS	XXXXXMTEKDAQPQLEEADD	20	35	10	5	10	10	XXXXXMTEKD | AQPQLEEADD	TEKD | AQPQ
P70335_n[230]GNLPESR	4.97761	18.6052	8.02372	5.03258e-05	0.028725	2.34068	T - L	Frac19	n[230]GNLPESR	GNLPESR	P70335	N-term(229.1629)	P70335_n[230]GNLPESR	Rho-associated protein kinase 1	1354	1114	1120	R	I	D	IEGWLSVPNR	ASFPSADETD	STGDSFETRFEKIDNLLRDPKSEVNSDCLLDGLDALVYDLDFPALRKNKNIDNFLSRYKDTINKIRDLRMKAEDYEVVKVIGRGAFGEVQLVRHKSTRKVYAMKLLSKFEMIKRSDSAFFWEERDIMAFANSPWVVQLFYAFQDDRYLYMVMEYMPGGDLVNLMSNYDVPEKWARFYTAEVVLALDAIHSMGFIHRDVKPDNMLLDKSGHLKLADFGTCMKMNKEGMVRCDTAVGTPDYISPEVLKSQGGDGYYGRECDWWSVGVFLYEMLVGDTPFYADSLVGTYSKIMNHKNSLTFPDDNDISKEAKNLICAFLTDREVRLGRNGVEEIKRHLFFKNDQWAWETLRDTVAPVVPDLSSDIDTSNFDDLEEDKGDEETFPIPKAFVGNQLPFVGFTYY…	semi_Nterm	not_terminal	semi_specific	not_terminal	TMT-labelled	nterm	neo_termini	feature-specific	P70335_n[230]GNLPESR	GNLPESR	ASFPSADETD	IEGWLSVPNR	ASFPSADETDGNLPESRIEGWLSVPNR	ASFPSADETDGNLPESRIEG	20	27	10	10	10	10	ASFPSADETD | GNLPESRIEG	DETD | GNLP
Q9CQV8_n[230]DNLTLWTSENQGDEGD	1.73153	10.5168	7.20553	0.000106184	0.0322799	1.46923	T - L	Frac19	n[230]DNLTLWTSENQGDEGD	DNLTLWTSENQGDEGD	Q9CQV8	N-term(229.1629)	Q9CQV8_n[230]DNLTLWTSENQGDEGD	14-3-3 protein beta/alpha	246	225	240	D	A	R	AGEGEN	DSTLIMQLLR	TMDKSELVQKAKLAEQAERYDDMAAAMKAVTEQGHELSNEERNLLSVAYKNVVGARRSSWRVISSIEQKTERNEKKQQMGKEYREKIEAELQDICNDVLELLDKYLILNATQAESKVFYLKMKGDYFRYLSEVASGENKQTTVSNSQQAYQEAFEISKKEMQPTHPIRLGLALNFSVFYYEILNSPEKACSLAKTAFDEAIAELDTLNEESYKDSTLIMQLLR	semi_Cterm	not_terminal	semi_specific	not_terminal	TMT-labelled	nterm	neo_termini	feature-specific	Q9CQV8_n[230]DNLTLWTSENQGDEGD	DNLTLWTSENQGDEGD	DSTLIMQLLR	AGEGENXXXX	DSTLIMQLLRDNLTLWTSENQGDEGDAGEGENXXXX	TSENQGDEGDAGEGENXXXX	20	36	6	10	10	10	TSENQGDEGD | AGEGENXXXX	DEGD | AGEG
Q7TSC1_n[230]GPVGNWGPPGDYPD	4.58742	11.7598	7.77319	5.71598e-05	0.0338957	2.24246	N - L	Frac20	n[230]GPVGNWGPPGDYPD	GPVGNWGPPGDYPD	Q7TSC1	N-term(229.1629)	Q7TSC1_n[230]GPVGNWGPPGDYPD	Protein PRRC2A	2158	416	429	D	R	R	RGGPPCKPPA	PKPPPPPPHR	SDRSGPTAKGKDGKKYSSLNLFDTYKGKSLEIQKPAVAPRHGLQSLGKVAIARRMPPPANLPSLKAENKGNDPNVSLVPKDGTGWASKQEQSDPKSSDASTAQPPESQPLPASQTPASNQPKRPPTAPENTPSVPSGVKSWAQASVTHGAHGDGGRASNLLSRFSREEFPTLQAAGDQDKAAKERESAEQSSGPGPSLRPQNSTTWRDGGGRGPDDLEGPDSKLHHGHDPRGGLQPSGPPQFPPYRGMMPPFMYPPYLPFPPPYGPQGPYRYPTPDGPSRFPRVAGPRGSGPPMRLVEPVGRPSILKEDNLKEFDQLDQENDDGWAGAHEEVDYTEKLKFSDEEDGRDSDEEGAEGHKDSQSAAAEEPETDGKKGTSPGSELPPPKTAWTENARPSETE…	semi_Cterm	not_terminal	semi_specific	not_terminal	TMT-labelled	nterm	neo_termini	feature-specific	Q7TSC1_n[230]GPVGNWGPPGDYPD	GPVGNWGPPGDYPD	PKPPPPPPHR	RGGPPCKPPA	PKPPPPPPHRGPVGNWGPPGDYPDRGGPPCKPPA	NWGPPGDYPDRGGPPCKPPA	20	34	10	10	10	10	NWGPPGDYPD | RGGPPCKPPA	DYPD | RGGP
Q7TSC1_n[230]GPVGNWGPPGDYPD	3.50821	12.15	13.8855	9.18099e-07	0.000746393	4.96686	N - L	Frac21	n[230]GPVGNWGPPGDYPD	GPVGNWGPPGDYPD	Q7TSC1	N-term(229.1629)	Q7TSC1_n[230]GPVGNWGPPGDYPD	Protein PRRC2A	2158	416	429	D	R	R	RGGPPCKPPA	PKPPPPPPHR	SDRSGPTAKGKDGKKYSSLNLFDTYKGKSLEIQKPAVAPRHGLQSLGKVAIARRMPPPANLPSLKAENKGNDPNVSLVPKDGTGWASKQEQSDPKSSDASTAQPPESQPLPASQTPASNQPKRPPTAPENTPSVPSGVKSWAQASVTHGAHGDGGRASNLLSRFSREEFPTLQAAGDQDKAAKERESAEQSSGPGPSLRPQNSTTWRDGGGRGPDDLEGPDSKLHHGHDPRGGLQPSGPPQFPPYRGMMPPFMYPPYLPFPPPYGPQGPYRYPTPDGPSRFPRVAGPRGSGPPMRLVEPVGRPSILKEDNLKEFDQLDQENDDGWAGAHEEVDYTEKLKFSDEEDGRDSDEEGAEGHKDSQSAAAEEPETDGKKGTSPGSELPPPKTAWTENARPSETE…	semi_Cterm	not_terminal	semi_specific	not_terminal	TMT-labelled	nterm	neo_termini	feature-specific	Q7TSC1_n[230]GPVGNWGPPGDYPD	GPVGNWGPPGDYPD	PKPPPPPPHR	RGGPPCKPPA	PKPPPPPPHRGPVGNWGPPGDYPDRGGPPCKPPA	NWGPPGDYPDRGGPPCKPPA	20	34	10	10	10	10	NWGPPGDYPD | RGGPPCKPPA	DYPD | RGGP
P17427_n[230]SASAVAPLAPGSEDNFAR	6.98828	13.0421	6.91199	0.000140933	0.048622	1.39996	N - L	Frac21	n[230]SASAVAPLAPGSEDNFAR	SASAVAPLAPGSEDNFAR	P17427	N-term(229.1629)	P17427_n[230]SASAVAPLAPGSEDNFAR	AP-2 complex subunit alpha-2	938	690	707	R	F	D	FVCKNNGVLF	GGLLVDVFSD	PAVSKGDGMRGLAVFISDIRNCKSKEAEIKRINKELANIRSKFKGDKALDGYSKKKYVCKLLFIFLLGHDIDFGHMEAVNLLSSNRYTEKQIGYLFISVLVNSNSELIRLINNAIKNDLASRNPTFMGLALHCIANVGSREMAEAFAGEIPKILVAGDTMDSVKQSAALCLLRLYRTSPDLVPMGDWTSRVVHLLNDQHLGVVTAATSLITTLAQKNPEEFKTSVSLAVSRLSRIVTSASTDLQDYTYYFVPAPWLSVKLLRLLQCYPPPDPAVRGRLTECLETILNKAQEPPKSKKVQHSNAKNAVLFEAISLIIHHDSEPNLLVRACNQLGQFLQHRETNLRYLALESMCTLASSEFSHEAVKTHIETVINALKTERDVSVRQRAVDLLYAMCDRSN…	semi_Nterm	not_terminal	semi_specific	not_terminal	TMT-labelled	nterm	neo_termini	feature-specific	P17427_n[230]SASAVAPLAPGSEDNFAR	SASAVAPLAPGSEDNFAR	GGLLVDVFSD	FVCKNNGVLF	GGLLVDVFSDSASAVAPLAPGSEDNFARFVCKNNGVLF	GGLLVDVFSDSASAVAPLAP	20	38	10	10	10	10	GGLLVDVFSD | SASAVAPLAP	VFSD | SASA
P97315_n[230]GYGYGQGAGTLSTD	3.4809	15.9295	13.0968	1.42237e-06	0.00180262	5.44362	T - L	Frac21	n[230]GYGYGQGAGTLSTD	GYGYGQGAGTLSTD	P97315	N-term(229.1629)	P97315_n[230]GYGYGQGAGTLSTD	Cysteine and glycine-rich protein 1	193	70	83	D	K	K	KGESLGIKHE	SCYGKKYGPK	PNWGGGKKCGVCQKTVYFAEEVQCEGNSFHKSCFLCMVCKKNLDSTTVAVHGEEIYCKSCYGKKYGPK	semi_Cterm	not_terminal	semi_specific	not_terminal	TMT-labelled	nterm	neo_termini	feature-specific	P97315_n[230]GYGYGQGAGTLSTD	GYGYGQGAGTLSTD	SCYGKKYGPK	KGESLGIKHE	SCYGKKYGPKGYGYGQGAGTLSTDKGESLGIKHE	GQGAGTLSTDKGESLGIKHE	20	34	10	10	10	10	GQGAGTLSTD | KGESLGIKHE	LSTD | KGES
E9PVX6_n[230]APGTPAPVQEEND	1.95498	12.4744	7.65156	7.006e-05	0.0201422	2.18298	T - L	Frac21	n[230]APGTPAPVQEEND	APGTPAPVQEEND	E9PVX6	N-term(229.1629)	E9PVX6_n[230]APGTPAPVQEEND	Proliferation marker protein Ki-67	3177	1156	1168	D	S	R	STAFMETPKQ	LGKRTKSPGR	ASSAHLVTIKRSGDDGAHFPLSLSSCLFGRSIECDIRIQLPVVSKRHCKIEVKEQEAILYNFSSTNPTQVNGVTIDEPVRLRHGDIITIIDRSFRYEDGNHEDGSKPTEFPGKSLGKEPSRRASRDSFCADPDGEGQDTKASKMTASRRSFVYAKGLSADSPASDGSKNSVSQDSSGHVEQHTGRNIVEPTSGDLFKKSRSTGSSYREPKSSPTQSLSNSNEKESPFEKLYQSMKEELDVKSQKSCRKSEPQPDRAAEESRETQLLVSGRARAKSSGSTPVTAASSPKVGKIWTERWRGGMVPVQTSTETAKMKTPVRHSQQLKDEDSRVTGRRHSVNLDEGESAQAVHKTVTPGKLATRNQAAVEAGDVASPADTPEHSSSKKRSIPAKVEAPSAETQ…	semi_Cterm	not_terminal	semi_specific	not_terminal	TMT-labelled	nterm	neo_termini	feature-specific	E9PVX6_n[230]APGTPAPVQEEND	APGTPAPVQEEND	LGKRTKSPGR	STAFMETPKQ	LGKRTKSPGRAPGTPAPVQEENDSTAFMETPKQ	TPAPVQEENDSTAFMETPKQ	20	33	10	10	10	10	TPAPVQEEND | STAFMETPKQ	EEND | STAF
P17427_n[230]SASAVAPLAPGSEDNFAR	7.36426	13.0421	7.28387	9.84932e-05	0.0242715	1.87018	T - L	Frac21	n[230]SASAVAPLAPGSEDNFAR	SASAVAPLAPGSEDNFAR	P17427	N-term(229.1629)	P17427_n[230]SASAVAPLAPGSEDNFAR	AP-2 complex subunit alpha-2	938	690	707	R	F	D	FVCKNNGVLF	GGLLVDVFSD	PAVSKGDGMRGLAVFISDIRNCKSKEAEIKRINKELANIRSKFKGDKALDGYSKKKYVCKLLFIFLLGHDIDFGHMEAVNLLSSNRYTEKQIGYLFISVLVNSNSELIRLINNAIKNDLASRNPTFMGLALHCIANVGSREMAEAFAGEIPKILVAGDTMDSVKQSAALCLLRLYRTSPDLVPMGDWTSRVVHLLNDQHLGVVTAATSLITTLAQKNPEEFKTSVSLAVSRLSRIVTSASTDLQDYTYYFVPAPWLSVKLLRLLQCYPPPDPAVRGRLTECLETILNKAQEPPKSKKVQHSNAKNAVLFEAISLIIHHDSEPNLLVRACNQLGQFLQHRETNLRYLALESMCTLASSEFSHEAVKTHIETVINALKTERDVSVRQRAVDLLYAMCDRSN…	semi_Nterm	not_terminal	semi_specific	not_terminal	TMT-labelled	nterm	neo_termini	feature-specific	P17427_n[230]SASAVAPLAPGSEDNFAR	SASAVAPLAPGSEDNFAR	GGLLVDVFSD	FVCKNNGVLF	GGLLVDVFSDSASAVAPLAPGSEDNFARFVCKNNGVLF	GGLLVDVFSDSASAVAPLAP	20	38	10	10	10	10	GGLLVDVFSD | SASAVAPLAP	VFSD | SASA
Q68FL4_n[230]GTVTEAPR	2.92192	24.0299	6.53225	0.000206319	0.0264504	1.2009	T - L	Frac21	n[230]GTVTEAPR	GTVTEAPR	Q68FL4	N-term(229.1629)	Q68FL4_n[230]GTVTEAPR	Putative adenosylhomocysteinase 3	613	112	119	R	T	D	TVKKQIQFAD	DGGEALVSPD	SVQVVSAAAAAKVPEVELKDLSPSEAEPQLGLSAAAVGAMVPPAGGGDPEAPAPAPAAERPPAPGPGSGPTAALSPAAGKVPQASAMKRSDPHHQHQRHRDGGEALVSPD	semi_Nterm	not_terminal	semi_specific	not_terminal	TMT-labelled	nterm	neo_termini	feature-specific	Q68FL4_n[230]GTVTEAPR	GTVTEAPR	DGGEALVSPD	TVKKQIQFAD	DGGEALVSPDGTVTEAPRTVKKQIQFAD	DGGEALVSPDGTVTEAPRTV	20	28	10	10	10	10	DGGEALVSPD | GTVTEAPRTV	VSPD | GTVT
Q7TSC1_n[230]GPVGNWGPPGDYPD	1.54911	12.15	6.33531	0.000253027	0.0290981	1.00526	T - L	Frac21	n[230]GPVGNWGPPGDYPD	GPVGNWGPPGDYPD	Q7TSC1	N-term(229.1629)	Q7TSC1_n[230]GPVGNWGPPGDYPD	Protein PRRC2A	2158	416	429	D	R	R	RGGPPCKPPA	PKPPPPPPHR	SDRSGPTAKGKDGKKYSSLNLFDTYKGKSLEIQKPAVAPRHGLQSLGKVAIARRMPPPANLPSLKAENKGNDPNVSLVPKDGTGWASKQEQSDPKSSDASTAQPPESQPLPASQTPASNQPKRPPTAPENTPSVPSGVKSWAQASVTHGAHGDGGRASNLLSRFSREEFPTLQAAGDQDKAAKERESAEQSSGPGPSLRPQNSTTWRDGGGRGPDDLEGPDSKLHHGHDPRGGLQPSGPPQFPPYRGMMPPFMYPPYLPFPPPYGPQGPYRYPTPDGPSRFPRVAGPRGSGPPMRLVEPVGRPSILKEDNLKEFDQLDQENDDGWAGAHEEVDYTEKLKFSDEEDGRDSDEEGAEGHKDSQSAAAEEPETDGKKGTSPGSELPPPKTAWTENARPSETE…	semi_Cterm	not_terminal	semi_specific	not_terminal	TMT-labelled	nterm	neo_termini	feature-specific	Q7TSC1_n[230]GPVGNWGPPGDYPD	GPVGNWGPPGDYPD	PKPPPPPPHR	RGGPPCKPPA	PKPPPPPPHRGPVGNWGPPGDYPDRGGPPCKPPA	NWGPPGDYPDRGGPPCKPPA	20	34	10	10	10	10	NWGPPGDYPD | RGGPPCKPPA	DYPD | RGGP

## Sheet: Supplementary Table S3
Supplementary Table S3: C-terminal caspase cleaved peptide (D1113↓GNLPESR) of Rho-associated protein kinase 1. In contrast column L stands for LPS, N for Nigericin and T for Talabostat / Val-boroPro treatment.
index	logFC	AveExpr	t	P.Value	adj.P.Val	B	contrast	modified_peptide	peptide	protein_id	assigned_modifications	protein_peptidemod	protein_description	protein_length	start_position	end_position	last_aa	aa_after	aa_before	following_10_resid	previous_10_resid	previous_all_resid	semi_type	general_position	specificity	is_terminal	nterm	tmt_tag	neo_termini_status	fdr_correction	protein_id_modif_pep	Peptide	prev_10_pad	following_10_pad	cleave_area	cleave_area20	len_20	len_clearea	len_follow	len_prev	len_followpad	len_prevpad	cleavage_site	short_cleavage_site
P70335_n[230]GNLPESR	3.97165	18.6052	6.01436	0.000356603	0.0813056	0.502648	N - L	n[230]GNLPESR	GNLPESR	P70335	N-term(229.1629)	P70335_n[230]GNLPESR	Rho-associated protein kinase 1	1354	1114	1120	R	I	D	IEGWLSVPNR	ASFPSADETD	STGDSFETRFEKIDNLLRDPKSEVNSDCLLDGLDALVYDLDFPALRKNKNIDNFLSRYKDTINKIRDLRMKAEDYEVVKVIGRGAFGEVQLVRHKSTRKVYAMKLLSKFEMIKRSDSAFFWEERDIMAFANSPWVVQLFYAFQDDRYLYMVMEYMPGGDLVNLMSNYDVPEKWARFYTAEVVLALDAIHSMGFIHRDVKPDNMLLDKSGHLKLADFGTCMKMNKEGMVRCDTAVGTPDYISPEVLKSQGGDGYYGRECDWWSVGVFLYEMLVGDTPFYADSLVGTYSKIMNHKNSLTFPDDNDISKEAKNLICAFLTDREVRLGRNGVEEIKRHLFFKNDQWAWETLRDTVAPVVPDLSSDIDTSNFDDLEEDKGDEETFPIPKAFVGNQLPFVGFTYY…	semi_Nterm	not_terminal	semi_specific	not_terminal	TMT-labelled	nterm	neo_termini	feature-specific	P70335_n[230]GNLPESR	GNLPESR	ASFPSADETD	IEGWLSVPNR	ASFPSADETDGNLPESRIEGWLSVPNR	ASFPSADETDGNLPESRIEG	20	27	10	10	10	10	ASFPSADETD | GNLPESRIEG	DETD | GNLP
P70335_n[230]GNLPESR	4.97761	18.6052	8.02372	5.03258e-05	0.028725	2.34068	T - L	n[230]GNLPESR	GNLPESR	P70335	N-term(229.1629)	P70335_n[230]GNLPESR	Rho-associated protein kinase 1	1354	1114	1120	R	I	D	IEGWLSVPNR	ASFPSADETD	STGDSFETRFEKIDNLLRDPKSEVNSDCLLDGLDALVYDLDFPALRKNKNIDNFLSRYKDTINKIRDLRMKAEDYEVVKVIGRGAFGEVQLVRHKSTRKVYAMKLLSKFEMIKRSDSAFFWEERDIMAFANSPWVVQLFYAFQDDRYLYMVMEYMPGGDLVNLMSNYDVPEKWARFYTAEVVLALDAIHSMGFIHRDVKPDNMLLDKSGHLKLADFGTCMKMNKEGMVRCDTAVGTPDYISPEVLKSQGGDGYYGRECDWWSVGVFLYEMLVGDTPFYADSLVGTYSKIMNHKNSLTFPDDNDISKEAKNLICAFLTDREVRLGRNGVEEIKRHLFFKNDQWAWETLRDTVAPVVPDLSSDIDTSNFDDLEEDKGDEETFPIPKAFVGNQLPFVGFTYY…	semi_Nterm	not_terminal	semi_specific	not_terminal	TMT-labelled	nterm	neo_termini	feature-specific	P70335_n[230]GNLPESR	GNLPESR	ASFPSADETD	IEGWLSVPNR	ASFPSADETDGNLPESRIEGWLSVPNR	ASFPSADETDGNLPESRIEG	20	27	10	10	10	10	ASFPSADETD | GNLPESRIEG	DETD | GNLP
P70335_n[230]GNLPESR	-1.00596	18.6052	-1.47729	0.178935	0.774983	-5.07574	N - T	n[230]GNLPESR	GNLPESR	P70335	N-term(229.1629)	P70335_n[230]GNLPESR	Rho-associated protein kinase 1	1354	1114	1120	R	I	D	IEGWLSVPNR	ASFPSADETD	STGDSFETRFEKIDNLLRDPKSEVNSDCLLDGLDALVYDLDFPALRKNKNIDNFLSRYKDTINKIRDLRMKAEDYEVVKVIGRGAFGEVQLVRHKSTRKVYAMKLLSKFEMIKRSDSAFFWEERDIMAFANSPWVVQLFYAFQDDRYLYMVMEYMPGGDLVNLMSNYDVPEKWARFYTAEVVLALDAIHSMGFIHRDVKPDNMLLDKSGHLKLADFGTCMKMNKEGMVRCDTAVGTPDYISPEVLKSQGGDGYYGRECDWWSVGVFLYEMLVGDTPFYADSLVGTYSKIMNHKNSLTFPDDNDISKEAKNLICAFLTDREVRLGRNGVEEIKRHLFFKNDQWAWETLRDTVAPVVPDLSSDIDTSNFDDLEEDKGDEETFPIPKAFVGNQLPFVGFTYY…	semi_Nterm	not_terminal	semi_specific	not_terminal	TMT-labelled	nterm	neo_termini	feature-specific	P70335_n[230]GNLPESR	GNLPESR	ASFPSADETD	IEGWLSVPNR	ASFPSADETDGNLPESRIEGWLSVPNR	ASFPSADETDGNLPESRIEG	20	27	10	10	10	10	ASFPSADETD | GNLPESRIEG	DETD | GNLP

## Sheet: Supplementary Table S4
Supplementary Table S4: Detected of three distinct peptides of Mmp14
Modified Peptide	Peptide	Protein ID	Gene	Assigned Modifications	protein_peptidemod	protein_description	protein_length	start_position	end_position	last_aa	aa_after	aa_before	following_10_resid	previous_10_resid	previous_all_resid	semi_type	general_position	specificity	is_terminal	Fraction 01	Fraction 02	Fraction 03	Fraction 04	Fraction 05	Fraction 06	Fraction 07	Fraction 08	Fraction 09	Fraction 10	Fraction 11	Fraction 12	Fraction 13	Fraction 14	Fraction 15	Fraction 16	Fraction 17	Fraction 18	Fraction 19	Fraction 20	Fraction 21
n[230]VWEGIPESPR	VWEGIPESPR	P53690	Mmp14	N-term(229.1629)	P53690_n[230]VWEGIPESPR	Matrix metalloproteinase-14	582	455	464	R	G	K	GSFMGSDEVF	VDSEYPKNIK	SPAPRPSRSLLLPLLTLGTALASLGWAQGSNFSPEAWLQQYGYLPPGDLRTHTQRSPQSLSAAIAAMQKFYGLQVTGKADLATMMAMRRPRCGVPDKFGTEIKANVRRKRYAIQGLKWQHNEITFCIQNYTPKVGEYATFEAIRKAFRVWESATPLRFREVPYAYIREGHEKQADIMILFAEGFHGDSTPFDGEGGFLAHAYFPGPNIGGDTHFDSAEPWTVQNEDLNGNDIFLVAVHELGHALGLEHSNDPSAIMAPFYQWMDTENFVLPDDDRRGIQQLYGSKSGSPTKMPPQPRTTSRPSVPDKPKNPAYGPNICDGNFDTVAMLRGEMFVFKERWFWRVRNNQVMDGYPMPIGQFWRGLPASINTAYERKDGKFVFFKGDKHWVFDEASLEPGYP…	specific	not_terminal	specific	not_terminal																	43327.9
n[230]GLPASINTAYER	GLPASINTAYER	P53690	Mmp14	N-term(229.1629)	P53690_n[230]GLPASINTAYER	Matrix metalloproteinase-14	582	363	374	R	K	R	KDGKFVFFKG	YPMPIGQFWR	SPAPRPSRSLLLPLLTLGTALASLGWAQGSNFSPEAWLQQYGYLPPGDLRTHTQRSPQSLSAAIAAMQKFYGLQVTGKADLATMMAMRRPRCGVPDKFGTEIKANVRRKRYAIQGLKWQHNEITFCIQNYTPKVGEYATFEAIRKAFRVWESATPLRFREVPYAYIREGHEKQADIMILFAEGFHGDSTPFDGEGGFLAHAYFPGPNIGGDTHFDSAEPWTVQNEDLNGNDIFLVAVHELGHALGLEHSNDPSAIMAPFYQWMDTENFVLPDDDRRGIQQLYGSKSGSPTKMPPQPRTTSRPSVPDKPKNPAYGPNICDGNFDTVAMLRGEMFVFKERWFWRVRNNQVMDGYPMPIGQFWR	specific	not_terminal	specific	not_terminal																		74083.9	109128	87214.2	102051
n[230]AVDSEYPK	AVDSEYPK	P53690	Mmp14	8K(229.1629), N-term(229.1629)	P53690_n[230]AVDSEYPK	Matrix metalloproteinase-14	582	444	451	K	N	R	NIKVWEGIPE	KYYRFNEEFR	SPAPRPSRSLLLPLLTLGTALASLGWAQGSNFSPEAWLQQYGYLPPGDLRTHTQRSPQSLSAAIAAMQKFYGLQVTGKADLATMMAMRRPRCGVPDKFGTEIKANVRRKRYAIQGLKWQHNEITFCIQNYTPKVGEYATFEAIRKAFRVWESATPLRFREVPYAYIREGHEKQADIMILFAEGFHGDSTPFDGEGGFLAHAYFPGPNIGGDTHFDSAEPWTVQNEDLNGNDIFLVAVHELGHALGLEHSNDPSAIMAPFYQWMDTENFVLPDDDRRGIQQLYGSKSGSPTKMPPQPRTTSRPSVPDKPKNPAYGPNICDGNFDTVAMLRGEMFVFKERWFWRVRNNQVMDGYPMPIGQFWRGLPASINTAYERKDGKFVFFKGDKHWVFDEASLEPGYP…	specific	not_terminal	specific	not_terminal																				45062
